# Supplementary material for: Multiple health behaviour change interventions for primary prevention of cardiovascular disease in primary care: systematic review and meta-analysis
Source: PubMed Central journal article supplement (PMC5734412; doi:10.1136/bmjopen-2016-015375), 2017-06-15
Supplement: bmjopen-2016-015375.draft_revisions.pdf [file bmjopen-2016-015375.draft_revisions.pdf]

# BMJ Open

## Multiple health behaviour change interventions for primary prevention of cardiovascular disease in primary care: systematic review and meta-analysis

|                                 |                                                                                                                                                                                                                                                                                      |
|---------------------------------|--------------------------------------------------------------------------------------------------------------------------------------------------------------------------------------------------------------------------------------------------------------------------------------|
| Journal:                        | <i>BMJ Open</i>                                                                                                                                                                                                                                                                      |
| Manuscript ID                   | bmjopen-2016-015375                                                                                                                                                                                                                                                                  |
| Article Type:                   | Research                                                                                                                                                                                                                                                                             |
| Date Submitted by the Author:   | 05-Dec-2016                                                                                                                                                                                                                                                                          |
| Complete List of Authors:       | Alageel, Samah; King's College London, Primary Care and Public Health<br>Wright, Alison; King's College London, Primary care and public health<br>McDermott, Lisa; King's College London, Primary Care and Public Health<br>Sciences<br>Gulliford, Martin; King's College London, UK |
| <b>Primary Subject Heading</b>: | Public health                                                                                                                                                                                                                                                                        |
| Secondary Subject Heading:      | Cardiovascular medicine                                                                                                                                                                                                                                                              |
| Keywords:                       | cardiovascular diseases, health behaviour, PRIMARY CARE, primary prevention, meta-analysis                                                                                                                                                                                           |
|                                 |                                                                                                                                                                                                                                                                                      |

SCHOLARONE™  
Manuscripts

1  
2  
3  
4 **Multiple health behaviour change interventions for primary prevention of cardiovascular**  
5 **disease in primary care: systematic review and meta-analysis**  
6  
7  
8  
9

10 **Samah Alageel MPH, Alison J. Wright PhD, Lisa McDermott PhD, Martin C Gulliford FFPH**  
11

12 **Department of Primary Care and Public Health Sciences, King's College London**  
13  
14

15  
16  
17  
18 **Correspondence: Samah Alageel**

19 **Department of Primary Care and Public Health Sciences,**  
20 **Faculty of Life Sciences and Medicine.**

21 **King's College London, Addison House, Guy's Campus,**  
22 **London SE1 1UL, United Kingdom**

23 **Email: [samah.alageel@kcl.ac.uk](mailto:samah.alageel@kcl.ac.uk)**

24 **Tel: 0207 848 6631**

25 **Fax: 0207 848 6620**  
26  
27  
28  
29  
30

31 **Word count:**

32 **Abstract 232**

33 **Text 4113**

34 **Tables 4**

35 **Figures 1**  
36  
37  
38  
39  
40  
41  
42  
43  
44  
45  
46  
47  
48  
49  
50  
51  
52  
53  
54  
55  
56  
57  
58  
59  
60

## ABSTRACT

**Objectives:** It is uncertain whether multiple health behaviour change interventions (MHBC) are effective at reducing cardiovascular disease (CVD) risk in primary care. A systematic review and meta-analysis were performed to evaluate the effectiveness of MHBC interventions on CVD-risk; the study also evaluated associations of theoretical frameworks and intervention components with intervention effectiveness.

**Methods:** The search included randomised controlled trials of MHBC interventions aimed at reducing CVD-risk in primary care up to 2015. Theoretical frameworks and intervention components were evaluated using standardised methods. Meta-analysis with stratification and meta-regression were used to evaluate intervention effects.

**Results:** We identified 27 trials (34,839 participants) with a minimum duration of 12 months follow-up. Pooled net change in systolic blood pressure (12 trials) was -1.45 (95% confidence interval -2.98 to 0.09,  $P=0.06$ ) mm Hg, diastolic blood pressure (11 trials) -1.01 (-1.91 to -0.11,  $P=0.03$ ) mm Hg, body mass index (10 trials) -0.11 (-0.25 to 0.02,  $P=0.10$ ) Kg/m<sup>2</sup> and serum total cholesterol (10 trials) -0.11 (-0.17 to -0.05,  $P<0.001$ ) mmol/L. There was no significant association between interventions with a reported theoretical basis and intervention outcomes, except for body weight ( $\beta$  1.14, 0.06 to 2.22,  $P=0.04$ ). No association was observed between intervention intensity (number of sessions and intervention duration) and intervention outcomes.

**Conclusions:** MHBC interventions delivered to participants in primary care did not appear to have quantitatively important effects on CVD-risk and CVD risk factors.

**Key words:** Cardiovascular Diseases, Health Behaviour, Primary Health Care, Meta-analysis, Primary Prevention, Risk Factors.

**Strengths and limitations:**

- The review includes all 27 published randomised controlled trials of MHBC interventions and cardiovascular risk with follow-up for 12 months or longer
- The study employed standardised instruments to evaluate the impact of theory use and behaviour change techniques in MHBC interventions.
- The majority of trials included were conducted in Europe and United States and only English language publications were included
- Not all studies evaluated all outcomes of interest and some lacked detail concerning intervention design and delivery

## INTRODUCTION

Cardiovascular disease (CVD) is the leading cause of death worldwide, accounting for over 30% of global mortality<sup>1</sup>. CVD is mediated by several antecedent behavioural risk factors, and its onset might be prevented or delayed by altering one or several risk factors<sup>1</sup>. Risk factors for CVD are inter-related and often coexist<sup>2-4</sup>. This observation has informed the development of multiple health behaviour change (MHBC) interventions for reduction of CVD-risk. Identifying individuals at high-risk of CVD in primary care, and encouraging lifestyle change to reduce risk factors, represents a widely used strategy for CVD prevention. Randomised controlled trials have been conducted in primary care to evaluate the effectiveness of MHBC interventions using lifestyle modification techniques instead of, or in addition to, pharmacological treatment to modify CVD risk factors. These trials have generally provided only equivocal evidence for reduction of CVD incidence through MHBC but the degree of effectiveness might be associated with level of risk<sup>5-7</sup>. Results from Ebrahim et al.'s<sup>5</sup> systematic review suggested that MHBC interventions have negligible effect on mortality in unselected populations, with a pooled odds ratio for coronary heart disease mortality of 0.99 (95% CI 0.92 to 1.07). Evidence of benefit was found in studies in high-risk populations including people with hypertension (OR 0.78, 0.68 to 0.89) or diabetes (OR 0.71, 0.61 to 0.83)<sup>5</sup>. However, general health checks were not found to reduce all cause-mortality, nor CVD- or cancer-related morbidity and mortality<sup>8</sup>.

Previous reviews have assessed the effectiveness of MHBC interventions in reducing CVD morbidity and mortality<sup>5,6,8</sup>, less is known about the effectiveness of these interventions in reducing CVD-risk and risk factor values in primary care.

1  
2  
3 In recent years, there has been growing appreciation of the role of employing psychological  
4 theory in behaviour change intervention design, and studying the impact of specific  
5 behaviour change techniques (BCT) on intervention outcomes<sup>9</sup>. Theories of the  
6 psychological determinants of behaviour can inform the development and evaluation of  
7 behaviour change interventions<sup>10</sup>. Interventions that systematically target psychological  
8 constructs, that evidence shows are more predictive of behaviour, are likely to be more  
9 effective<sup>11</sup>. A review of internet-based interventions suggested that more intensive use of  
10 theory was associated with greater behaviour change<sup>12</sup>, but another review found little  
11 evidence of an association between theory use and intervention effects on healthy eating or  
12 physical activity<sup>13</sup>. This equivocal evidence could arise if a high proportion of behaviour  
13 change interventions are not based on a theory or the theory is not applied extensively<sup>14</sup>.  
14  
15  
16  
17  
18  
19  
20  
21  
22  
23  
24  
25  
26  
27

28 Behaviour change techniques (BCT) are 'the active components of an intervention designed  
29 to change behaviour'<sup>15</sup>. Identifying specific BCTs associated with greater impact on  
30 intervention effectiveness is essential for future intervention design<sup>16</sup>. Previous reviews  
31 suggested that interventions using the BCTs "provision of instructions," "self-monitoring of  
32 behaviour," "relapse prevention," and "prompt practice" led to greater reductions in weight  
33 among obese individuals<sup>17</sup>, while interventions designed to modify physical activity and/or  
34 diet were more effective when they included self-monitoring and particularly when they  
35 combined self-monitoring with another BCT associated with control theory<sup>18</sup>. Identifying  
36 BCTs associated with greater intervention effectiveness and exploring the impact of applying  
37 theory will contribute to the design of future MHBC interventions targeting CVD risk in  
38 primary care.  
39  
40  
41  
42  
43  
44  
45  
46  
47  
48  
49  
50  
51  
52  
53  
54  
55  
56  
57  
58  
59  
60

## Objectives

This systematic review had three objectives: first, to assess the effectiveness of MHBC interventions, directed at changing two or more behaviours, at reducing CVD-risk and CVD risk factors in adults without existing cardiovascular conditions; secondly, to evaluate whether using theory to develop interventions is associated with intervention effectiveness; and thirdly, to evaluate the association between behaviour change techniques employed and intervention effects.

For peer review only

## METHODS

Studies were selected according to the following criteria:

### Participants

Trials that recruited an adult population free of CVD were included. Following previous reviews <sup>5</sup>, we included trials with less than 20% participants with CVD. Studies of patient populations with established disease, such as diabetes, were excluded.

### Interventions

We included studies that evaluated behaviour change interventions aimed at reducing CVD-risk by intervening on two or more risk behaviours at the same time. Risk behaviours included: physical activity, diet, alcohol consumption, use of stress management and smoking. Comparators were usual care or less intensive interventions.

### Settings

Interventions where participants were recruited, and interventions were delivered by trained healthcare professionals or primary care staff, in primary care premises (including general practice, family practice or primary care clinic).

### Study design

Controlled trials, with individual or cluster randomisation, providing  $\geq 12$  month follow-up for outcome evaluation.



### Outcome measures

Long term outcomes of MHBC interventions including CVD mortality and clinical events have been reported previously<sup>5 6</sup> and were not included in this systematic review. Primary outcomes were changes in CVD-risk scores, body mass index (BMI) or body weight, blood pressure, and serum total cholesterol levels. Secondary outcomes were changes in physical activity, diet, smoking and alcohol consumption.

### Language

Studies reported in English.

### Search strategy

Multiple sources of ascertainment were used, including electronic databases (Medline, EMBASE, PsycINFO and CENTRAL) and searching reference lists of included papers. The search results and search terms of the previous review<sup>5</sup> were used with searching extended from 2006 until May 2015. Search strategies are displayed in appendix A. Titles were screened by one reviewer (SA) and a second reviewer (MG) checked a random set of studies, approximately 10% of the search results. The selection process is displayed in Figure 1.

### Methodologic quality

Studies were evaluated using the Cochrane risk of bias tool<sup>19</sup>. This assesses six domains of bias including selection bias, performance bias, detection bias, attrition bias, reporting bias and other biases<sup>19</sup>.

### Data extraction

Interventions were coded by country, target behaviours, participant and intervention characteristics, mode of delivery and intervention outcomes. In addition, Michie and Prestwich's<sup>20</sup> method of assessing the application of theory in the development and evaluation of behaviour change interventions was used. The Theory Coding Scheme (TCS) consists of 19 items that cover different aspects that may be informed by theory<sup>20</sup>. We used three measures to reflect the extent of theory use as reported in previous reviews<sup>12 13</sup>: whether the theory was used to develop intervention's BCTs (item 5 of TCS ); the degree to which BCTs were linked to a theory-relevant construct (items 7-9); and the extent to which theory-relevant constructs were explicitly targeted by BCTs (items 9-11).

The theory-based taxonomy of 93 behaviour change techniques developed by Michie, Richardson et al.<sup>9</sup> was used to identify intervention techniques. The assessment was completed by two researchers (LM and SA) with good agreement for intervention groups (77.8% agreement) and control groups (92.6% agreement). Discrepancies were discussed and resolved to reach full agreement. Intervention characteristics and BCTs were also extracted from descriptions of the control group, because the chosen nature of the control group can influence the apparent effectiveness of interventions<sup>21</sup>. We attempted to contact study authors to provide additional information where necessary. However, when information was not available, we assumed missing outcome data to occur at random.

### Data analysis

Outcome data were combined in random effects meta-analyses using 'metan' commands in STATA. We quantified statistical heterogeneity using  $I^2$  statistic. Random effects models were chosen due to the considerable heterogeneity for certain outcomes. For continuous outcomes we used mean changes in each trial arm to calculate net effects. We expressed

1  
2  
3 effects for binary variables as risk differences. Meta-regression were used to examine the  
4 effect of number of interventions' sessions, intervention duration, types of BCTs used on  
5 intervention outcomes. Intervention duration was calculated by multiplying the number of  
6 sessions and the sessions' duration. Publication bias was assessed using Egger's  
7 regression test<sup>22</sup> using 'metabias' and 'metafunnel' commands in STATA. Mendis et al<sup>23</sup>  
8 Nigeria site's study had unusually high summary estimates, and heterogeneity diminished  
9 substantially after this study was excluded. This study was therefore treated as an outlier  
10 and results were reported with the exclusion of this study.  
11  
12  
13  
14  
15  
16  
17  
18  
19  
20  
21  
22  
23  
24  
25  
26  
27  
28  
29  
30  
31  
32  
33  
34  
35  
36  
37  
38  
39  
40  
41  
42  
43  
44  
45  
46  
47  
48  
49  
50  
51  
52  
53  
54  
55  
56  
57  
58  
59  
60

1  
2  
3 **RESULTS**  
4

5 The initial search identified 21,290 references, with 55 relevant trials identified from the  
6 previous systematic review<sup>5</sup>. After removing duplicates, 16,793 titles were screened. A total  
7 of 27 trials were included in this review (Figure 1).  
8  
9  
10  
11  
12  
13  
14  
15  
16  
17  
18  
19  
20  
21  
22  
23  
24  
25  
26  
27  
28  
29  
30  
31  
32  
33  
34  
35  
36  
37  
38  
39  
40  
41  
42  
43  
44  
45  
46  
47  
48  
49  
50  
51  
52  
53  
54  
55  
56  
57  
58  
59  
60

For peer review only

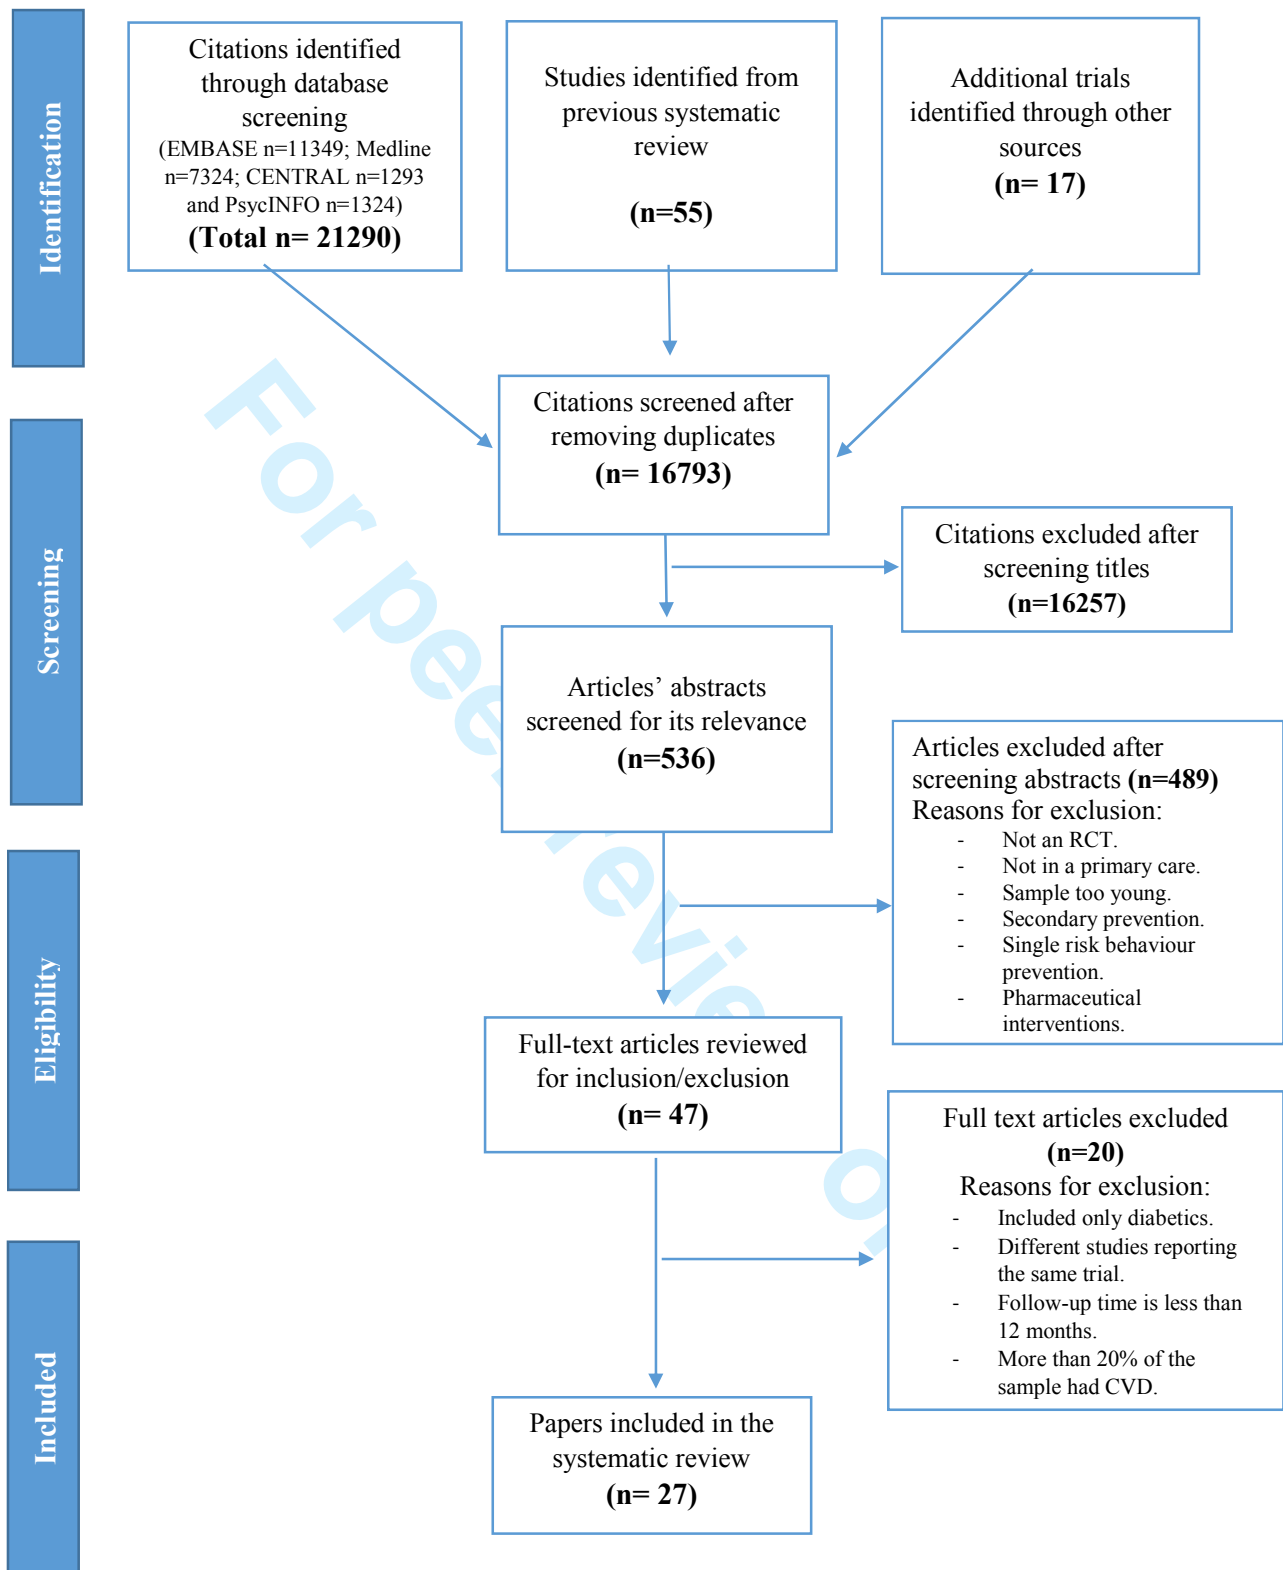

**Figure 1:** PRISMA flow diagram outlining the systematic review process.

**Included studies**

We identified a total of 27 trials of MHBC intervention in primary care with 34839 participants. The duration of follow-up ranged from 12 months to 6 years (median 12 months). Intervention duration ranged from three months up to three years (median 12 months). Summary of included studies characteristics are presented in table 1 and supplementary table 1.

For peer review only

**Table 1: Summary of characteristics of 27 trials included in the review. Figures are frequencies (column percent).**

| Characteristics                      |                           | Freq. (%)      |
|--------------------------------------|---------------------------|----------------|
| <b>Total</b>                         |                           | 27 (100)       |
| <b>Country</b>                       | UK                        | 5 (18.5)       |
|                                      | USA                       | 4 (14.8)       |
|                                      | Europe                    | 14 (51.8)      |
|                                      | Others                    | 4 (14.8)       |
| <b>Number of participants</b>        | Median (IQR)              | 419 (224-1200) |
| <b>Gender</b>                        | Male only                 | 1 (3.7)        |
|                                      | Female only               | 1 (3.7)        |
|                                      | Both                      | 25 (92.6)      |
| <b>Age</b>                           | Minimum age, median (IQR) | 30 (21-40)     |
|                                      | Maximum age, median (IQR) | 65 (59-70)     |
| <b>Intervention outcomes</b>         | CVD risk                  | 12 (44.4)      |
|                                      | Body weight               | 21 (77.7)      |
|                                      | Blood pressure            | 22 (81.5)      |
|                                      | Serum cholesterol         | 22 (81.5)      |
|                                      | Diet                      | 15 (55.5)      |
|                                      | Physical activity         | 18 (66.7)      |
|                                      | Alcohol                   | 6 (22.2)       |
|                                      | Smoking                   | 14 (51.8)      |
| <b>Number of targeted behaviours</b> | 2 behaviours              | 8 (29.6)       |
|                                      | 3 behaviours              | 12 (44.4)      |
|                                      | 4 behaviours              | 6 (22.2)       |
|                                      | 5 behaviours              | 1 (3.7)        |
| <b>Follow-up duration</b>            | 12 months                 | 15 (55.5)      |
|                                      | >12 months                | 12 (44.4)      |

CVD, cardiovascular disease; IQR, interquartile range

### Study characteristics

Diet and physical activity were targeted in eight trials, with nine trials targeting diet, physical activity and smoking. Diet, physical activity, smoking and alcohol consumption were targeted in six interventions and two interventions targeted diet, physical activity and stress management. Only one intervention targeted diet, physical activity, stress and alcohol consumption and one intervention targeted all five behaviours. A wide range of intervention modalities was investigated (Table 2 and supplementary table 2), including individual and group sessions, telephone conversations and provision of written materials. The majority of the included trials reported offering “usual care” to the control group, with few details provided. Six trials offered face-to-face sessions and six trials offered face-to-face sessions and written materials. Written materials alone were offered in three trials and no intervention was offered to the control group in three interventions.



**Table 2: Summary of interventions characteristics for 27 trials included in the review. Figures are frequencies (column percents).**

|                                                    |                                                 | Intervention<br>N (%) | Control<br>N (%) |
|----------------------------------------------------|-------------------------------------------------|-----------------------|------------------|
| <b>Type of staff delivering intervention</b>       | GPs and physicians                              | 7 (25.9)              |                  |
|                                                    | Nurses                                          | 13 (48.1)             |                  |
|                                                    | Dietitian                                       | 6 (22.2)              |                  |
|                                                    | Others                                          | 10 (37.0)             |                  |
| <b>Mode of intervention delivery</b>               | Face to face sessions                           | 27 (100)              | 11 (40.7)        |
|                                                    | Group sessions                                  | 6 (22.2)              | 1 (3.7)          |
|                                                    | Written materials                               | 12 (44.4)             | 6 (22.2)         |
|                                                    | Telephone sessions                              | 7 (25.9)              | -                |
|                                                    | Unclear                                         | -                     | 11 (40.7)        |
| <b>Number of intervention sessions</b>             | 1-4 sessions                                    | 5 (18.5)              | 9 (33.3)         |
|                                                    | 5-9 sessions                                    | 10 (37.0)             | 2 (7.4)          |
|                                                    | 10-15 sessions                                  | 3 (11.1)              | 1 (3.7)          |
|                                                    | >15 sessions                                    | 3 (11.1)              | -                |
|                                                    | Unclear                                         | 6 (22.2)              | 15 (55.5)        |
| <b>Number of behaviour change techniques (BCT)</b> | 1-2 BCTs                                        | 5 (18.5)              | 12 (44.4)        |
|                                                    | 3-4 BCTs                                        | 10 (37.0)             | 1 (3.7)          |
|                                                    | 5-6 BCTs                                        | 9 (33.3)              | -                |
|                                                    | 7-9 BCTs                                        | 2 (7.4)               | -                |
|                                                    | 10 BCTs                                         | 1 (3.7)               | -                |
|                                                    | Unclear                                         | -                     | 14 (51.8)        |
| <b>Frequently used behaviour change techniques</b> | Credible source (9.1)                           | 19 (70.4)             | 5 (18.5)         |
|                                                    | Goal setting (behaviour) (1.1)                  | 17 (62.9)             | 2 (7.4)          |
|                                                    | Information about health consequences (5.1)     | 8 (29.6)              | 5 (18.5)         |
|                                                    | Self-monitoring of behaviour (2.3)              | 7 (25.9)              | -                |
|                                                    | Instruction on how to perform a behaviour (4.1) | 7 (25.9)              | 1 (3.7)          |
|                                                    | Action planning (1.4)                           | 6 (22.2)              | -                |

### **Risk of bias in included studies**

Risk of bias assessment is presented in supplementary table 3. Almost half of the included trials (n=13) reported using intention-to-treat (ITT) analysis, while 14 studies did not state ITT procedures. Loss to follow-up ranged from 1.5% to 43%. Not all trials reported sufficient detail to assess risk of bias and these were rated as 'unclear'.

### **Treatment fidelity**

Few studies reported using fidelity checks<sup>24-28</sup> to confirm that interventions were delivered as intended and this raises a question of whether the interventions were delivered as planned, and in a consistent manner.

### **Effect of interventions**

Pooled effect sizes for all outcomes are presented in Table 3 and forest plots are presented in Appendix B.

**Table 3: Pooled effects from meta-analysis of multiple health behaviour interventions on CVD-risk and CVD risk factors.**

| Outcome                                            | N  |            | Pooled effect size | 95% confidence interval | P value | I <sup>2</sup> (%) |
|----------------------------------------------------|----|------------|--------------------|-------------------------|---------|--------------------|
| Systolic blood pressure (mmHg)                     | 12 |            | -1.45              | -2.98, 0.09             | 0.06    | 68.3               |
| Systolic blood pressure (mmHg) by medication use   | 6  | Medication | -2.03              | -4.84, 0.77             | 0.16    | 79.9               |
|                                                    | 6  | None       | -0.55              | -1.69, 0.59             | 0.35    | 3.4                |
| Diastolic blood pressure (mmHg)                    | 11 |            | -1.01              | -1.91, -0.11            | 0.03    | 62.4               |
| Diastolic blood pressure (mmHg) by medication use  | 6  | Medication | -1.34              | -1.95, -0.73            | <0.001  | 0.0                |
|                                                    | 5  | None       | -0.78              | -2.50, 0.93             | 0.37    | 73.0               |
| Serum total cholesterol (mmol/L)                   | 10 |            | -0.11              | -0.17, -0.05            | <0.001  | 0.0                |
| Serum total cholesterol (mmol/L) by medication use | 4  | Medication | -0.11              | -0.21, -0.02            | 0.01    | 0.0                |
|                                                    | 6  | None       | -0.11              | -0.18, -0.03            | 0.01    | 0.0                |
| Smoking (%)                                        | 10 |            | -0.01              | -0.02, 0.01             | 0.57    | 20.2               |
| Body mass index (Kg/m <sup>2</sup> )               | 10 |            | -0.11              | -0.25, 0.02             | 0.10    | 0.0                |
| Body weight (Kg)                                   | 8  |            | -0.87              | -1.50, -0.24            | 0.01    | 35.4               |
| CVD-risk using SCORE (%)                           | 2  |            | 0.12               | -0.37, 0.61             | 0.62    | 0.0                |
| Systolic blood pressure (mmHg) by theory use       | 5  | Theory     | -2.18              | -5.92, 1.56             | 0.25    | 72.3               |
|                                                    | 7  | None       | -1.07              | -2.77, 0.63             | 0.22    | 69.2               |
| Diastolic blood pressure (mmHg) by theory use      | 5  | Theory     | -1.25              | -2.43, -0.06            | 0.04    | 0.4                |
|                                                    | 6  | None       | -0.94              | -2.17, 0.29             | 0.13    | 75.7               |
| Serum total cholesterol (mmol/L) by theory use     | 4  | Theory     | -0.03              | -0.15, 0.10             | 0.68    | 0.0                |
|                                                    | 6  | None       | -0.13              | -0.20, -0.07            | <0.001  | 0.0                |
| Body mass index(Kg/m <sup>2</sup> ) by theory use  | 5  | Theory     | -0.15              | -0.41, 0.10             | 0.24    | 0.0                |
|                                                    | 5  | None       | -0.12              | -0.30, 0.07             | 0.22    | 13.1               |
| Body weight by (Kg) theory use                     | 4  | Theory     | -0.24              | -0.94, 0.45             | 0.49    | 0.0                |
|                                                    | 4  | None       | -1.33              | -2.08, -0.59            | <0.001  | 23.9               |

N, number of trials; I<sup>2</sup>, index of heterogeneity

## Changes in CVD risk factors

**Blood pressure:** twelve trials<sup>23 25 29-38</sup> reported changes in participants' systolic blood pressure (SBP) with no evidence of publication bias (Egger's test,  $P=0.82$ ). The weighted mean difference in SBP was  $-1.45$  mm Hg (95% CI  $-2.98$  to  $0.09$  mm Hg;  $P=0.06$ ). Diastolic blood pressure (DBP) was reported in 11 trials<sup>23 25 29-31 33-38</sup>, with no evidence of publication bias (Egger's test,  $P=0.38$ ). Weighted mean difference in DBP was  $-1.01$  mmHg ( $-1.91$  to  $-0.11$  mm Hg;  $P=0.03$ ). Out of the 12 interventions that evaluated blood pressure, four reported that participants in all study groups were taking antihypertensive medications and two reported they were taking unspecified medications. In the subgroup of trials that reported use of medications there was a greater effect on SBP ( $-2.03$  vs.  $-0.55$  mmHg) and DBP ( $-1.34$  vs.  $-0.78$  mmHg) compared to trials that did not report using medications.

**Serum total cholesterol:** Ten trials<sup>25 29-31 33-35 37-39</sup> evaluated serum total cholesterol and provided sufficient data for analysis (Egger's test,  $P=0.53$ ). Serum total cholesterol levels showed a small decrease in favour of intervention ( $-0.11$  mmol/L; 95%  $-0.17$  to  $-0.05$ ;  $P<0.001$ ). Three of the trials included in the analysis reported the use of lipid lowering medication and one reported the use of unspecified medication by all study groups. The weighted mean difference for total cholesterol was not different between trials that reported using medication and trials that have not stated using medications (Table 3).

**Smoking:** Ten studies<sup>23 24 27-30 32 35 40 41</sup> reported smoking prevalence following the intervention. The pooled analysis showed no evidence of reductions in smoking behaviour (RD  $-0.01$  %; 95% CI  $-0.02$  to  $0.01$ ;  $P=0.57$ ). All studies included in the analysis relied on self-reported smoking status and only one<sup>27</sup> reported using smoking cessation medication. There was no evidence of publication bias ( $P=0.55$ ).

1  
2  
3  
4  
5  
6 **Weight and body mass index (BMI):** Ten studies<sup>23 25 29 31 33-38</sup> reported on BMI as an  
7  
8 outcome. Egger's test suggested possible publication bias (P=0.049). The weighted mean  
9  
10 change was -0.11 kg/m<sup>2</sup> (95% CI -0.25 to 0.02; P=0.10). Fewer studies (n=8)<sup>25 31 33-35 38 41 42</sup>  
11  
12 reported on weight changes, showing a reduction of -0.87 kg (CI -1.50 to -0.24 kg; P= 0.01)  
13  
14 with no evidence of publication bias (P=0.62).  
15

16  
17  
18 **Dietary behaviour:** Thirteen trials<sup>23-28 31 32 39 41-44</sup> reported dietary behaviours as an outcome  
19  
20 of the interventions. Outcomes of dietary interventions were measured using diverse  
21  
22 methods, therefore, a meta-analysis was not conducted. Trials used a range of dietary self-  
23  
24 report instruments to assess dietary behaviour, and none have used additional objective  
25  
26 measures. Fruit and vegetable consumption was reported either as portions per day<sup>23-25 41</sup>  
27  
28<sup>44</sup>, or proportion of participants who met the recommendation for fruits and vegetable intake  
29  
30<sup>24 31 32</sup>. There was no positive effect of the intervention on fruits and vegetable consumption  
31  
32 in most of the trials<sup>24 25 32 41</sup>, and some trials did report improvement following the  
33  
34 intervention<sup>31 44</sup>. Fat intake was commonly measured as a dietary outcome either in terms of  
35  
36 fat intake per day,<sup>25 31 42 43</sup> or as a fat score<sup>27 32</sup>. All the trials reported reductions in fat intake  
37  
38 after the intervention, except Koelewijn-van Loon et al.<sup>32</sup> trial, where there was no significant  
39  
40 difference between the intervention and control group.  
41  
42  
43  
44

45  
46 **Physical activity behaviour:** Seventeen trials reported changes in physical activity<sup>24-32 34 35</sup>  
47  
48<sup>37 38 40 41 44 45</sup>. Physical activity was assessed via self-report. Due to the variety of  
49  
50 measurements used, meta-analysis was not feasible. Some trials reported physical activity  
51  
52 as the proportion of participants who are physically active<sup>27 29 37 40 44</sup>. Other studies  
53  
54 measured physical activity as the number of minutes per week,<sup>25 32</sup> or classified participants  
55  
56 based on their weekly exercise<sup>24 26 44</sup>. Eight of these trials<sup>25 27 28 34 35 38 41 44</sup> resulted in an  
57  
58  
59  
60

1  
2  
3 increase in reported physical activity following the intervention, and nine<sup>24 26 29-31 37 40 42 45</sup>  
4  
5 trials concluded that the intervention had no impact on physical activity.  
6  
7  
8  
9

10 **Alcohol consumption:** Alcohol consumption was reported as an outcome in seven trials<sup>28</sup>  
11  
12<sup>32 38 40-42 44</sup>. However, it was measured differently, which did not allow for pooled effect  
13  
14 analysis. Two trials<sup>38 40</sup> reported reductions in alcohol consumption following the  
15  
16 interventions, whereas the majority of the studies<sup>28 32 41 42 44</sup> did not find significant reductions  
17  
18 in alcohol intake.  
19

20  
21  
22  
23  
24 **Cardiovascular disease risk:** Studies used different risk scores to examine the effect of  
25  
26 interventions on CVD-risk. Two studies<sup>36 45</sup> used the Framingham risk equation<sup>46</sup> and two  
27  
28 studies<sup>28 47</sup> used the Dundee risk score<sup>48</sup>. These trials reported larger CVD-risk reductions  
29  
30 in the intervention group compared to the control group. All of these trials had missing data  
31  
32 making it not possible to analyse the pooled effect. Four studies<sup>24 32 37 40</sup> used the SCORE  
33  
34 risk equation<sup>49</sup>, however because of missing data we only included two studies<sup>24 32</sup> in the  
35  
36 analysis, both conducted in the Netherlands. There was a non-significant increase in  
37  
38 weighted mean difference of 0.12% CVD-risk (95% CI -0.37 to 0.61; P= 0.62).  
39  
40  
41  
42  
43

#### 44 **Study characteristics:**

45  
46  
47 **Intervention time and number of sessions:** The number of sessions was reported in 20  
48  
49 trials, ranging from three to 56 sessions (median=6 sessions). No significant associations  
50  
51 were detected between the number of sessions and SBP ( $\beta = -0.16$ , P=0.67), DBP ( $\beta = 0.15$ ,  
52  
53 P= 0.59), serum total cholesterol ( $\beta = -0.01$ , P= 0.59), BMI ( $\beta = -0.01$ , P=0.72) and weight ( $\beta =$   
54  
55 -0.13, P=0.72). Ten of the included trials provided enough details to calculate intervention  
56  
57 delivery duration, which ranged from 45 to 630 mins (median=285 mins). No significant  
58  
59  
60

1  
2  
3 associations were detected between intervention duration and SBP ( $\beta=-0.02$ ,  $P=0.17$ ), DBP  
4 ( $\beta=-0.01$ ,  $P= 0.36$ ), BMI ( $\beta= -0.00$ ,  $P= 0.79$ ) and weight ( $\beta= 0.00$ ,  $P=0.75$ ). Hence, more  
5  
6 sessions and longer intervention duration were not necessarily associated with greater  
7  
8 intervention effectiveness.  
9

10  
11 **Theory use:** Of the 27 trials included, nine reported using psychological theory (or a  
12 combination of two theories) to underpin the intervention. The Transtheoretical Model (TTM)  
13  
14 <sup>50</sup> was used in eight trials <sup>25 26 34-38 41</sup>, while Social Cognitive Theory (SCT) <sup>51</sup> was used in four  
15  
16 <sup>25 26 36 52</sup> interventions.  
17  
18

19  
20 We tested the extent of theory use using Theory Coding Scheme (TCS) <sup>20</sup> in three ways  
21 (supplementary table 4). The first method was based on the use of theory in developing  
22 intervention techniques (item 5 in TCS). Only four of nine trials were coded yes for this item.  
23  
24 The second method was used to reflect the extent to which each BCT was linked to a  
25 theory-relevant construct (items 7 to 9). Only four out of nine trials were coded yes to at least  
26 one of these items. The third method was used to reflect the extent to which theory-relevant  
27 constructs were targeted by BCTs (items 9 to 11). Only four out of nine trials were coded yes  
28 to at least one of these items. We were not able to examine the impact of differing levels of  
29 theory use on intervention outcomes due to the small number of trials using theory  
30 extensively. However, we were able to test whether studies that merely reported using a  
31 theory had greater impact on outcomes using meta-regression. There was no significant  
32 association between studies which stated using a theory and SBP ( $\beta= -1.15$ ,  $P= 0.54$ ), DBP  
33 ( $\beta= -0.37$ ,  $P= 0.73$ ), serum total cholesterol ( $\beta= 0.11$ ,  $P= 0.17$ ) and BMI ( $\beta= -0.06$ ,  $P= 0.72$ ).  
34  
35 Studies that reported using a theory had increased weight outcomes ( $\beta= 1.14$ ,  $P= 0.04$ , CI=  
36  
37 0.06, 2.22) compared to studies that did not report using a theory.  
38  
39  
40  
41  
42  
43  
44  
45  
46  
47  
48  
49  
50  
51  
52  
53

54 **Effectiveness of specific behaviour change techniques:** The number of behaviour  
55 change techniques (BCTs) in the intervention group varied, ranging from two to ten BCTs  
56  
57  
58  
59  
60

1  
2  
3 (median= 4). Behaviour change techniques in the control group were generally poorly  
4 described as the majority of trials (n= 14) did not appear to offer any BCTs.  
5  
6

7 Twenty nine different BCTs were identified from the included trials (supplementary table 2).  
8  
9 The most commonly used BCTs in the intervention group were 'credible source' and 'Goal  
10 setting (behaviour)', which were used in 19 and 17 trials respectively. In the control group,  
11  
12 'Information about health consequences' and 'Credible source' were most commonly used,  
13  
14 which were each used in five interventions.  
15  
16

17  
18 We tested the potential impact of using specific BCTs on intervention outcomes (table 4).  
19  
20 For SBP, one BCT had a significant influence on effect sizes. Interventions employing  
21  
22 'Review of behaviour goal(s)' resulted in an increase in SBP ( $\beta=3.96$ ,  $P= 0.05$ ) than those  
23  
24 not using this BCT. For DBP, using 'Information about health consequences' was associated  
25  
26 with less change in DBP ( $\beta=1.87$ ,  $P= 0.04$ ). For total cholesterol, there were no BCTs  
27  
28 significantly associated with the effectiveness of the interventions. The same was the case  
29  
30 for BMI, but for weight, interventions that included 'Action planning' resulted in greater  
31  
32 reductions than those that did not ( $\beta= -1.22$ ,  $P= 0.04$ ).  
33  
34  
35  
36  
37  
38  
39  
40  
41  
42  
43  
44  
45  
46  
47  
48  
49  
50  
51  
52  
53  
54  
55  
56  
57  
58  
59  
60



Table 4: Meta-regression results of intervention effects for studies using or not using particular behaviour change techniques.

| Outcome                                    | BCT                                               | BCT included                  |                       |                | BCT not included |                       |               | $\beta$      | CI                    | P             |
|--------------------------------------------|---------------------------------------------------|-------------------------------|-----------------------|----------------|------------------|-----------------------|---------------|--------------|-----------------------|---------------|
|                                            |                                                   | MD                            | CI                    | N              | MD               | CI                    | N             |              |                       |               |
| Systolic blood pressure                    | 1.1 Goal setting (behaviour).                     | -0.98                         | -2.58 to 0.63         | 9              | -3.63            | -4.93 to -2.34        | 3             | 2.16         | -2.03 to 6.36         | 0.28          |
|                                            | 1.2 Problem solving.                              | -3.19                         | -9.21 to 2.83         | 3              | -1.14            | -2.70 to 0.42         | 9             | -1.63        | -6.16 to 2.90         | 0.45          |
|                                            | 1.4 Action planning.                              | -1.99                         | -5.38 to 1.39         | 4              | -1.29            | -3.12 to 0.53         | 8             | -0.60        | -4.83 to 3.62         | 0.76          |
|                                            | <b>1.5 Review behaviour goal(s)</b>               | <b>1.76</b>                   | <b>-1.66 to 5.19</b>  | <b>3</b>       | <b>-2.19</b>     | <b>-3.73 to -0.66</b> | <b>9</b>      | <b>3.96</b>  | <b>0.02 to 7.90</b>   | <b>0.05</b>   |
|                                            | 5.1 Info. about consequences.                     | -0.38                         | -1.99 to 1.23         | 4              | -2.08            | -4.31 to 0.14         | 8             | 1.54         | -2.09 to 5.16         | 0.37          |
|                                            | 9.1 Credible source.                              | -2.37                         | -4.28 to -0.46        | 6              | -0.19            | -2.85 to 2.47         | 6             | -2.37        | -6.10 to 1.35         | 0.19          |
|                                            | 9.2 Pros and cons.                                | 0.16                          | -3.89 to 4.20         | 4              | -1.98            | -3.56 to -0.40        | 8             | 2.31         | -1.68 to 6.31         | 0.23          |
|                                            | 11.2 Reduce negative emotions.                    | -1.65                         | -9.80 to 6.51         | 3              | -1.38            | -2.84 to 0.08         | 9             | -0.22        | -5.48 to 5.03         | 0.93          |
| Diastolic blood pressure                   | 1.1 Goal setting (behaviour).                     | -0.88                         | -2.04 to 0.28         | 8              | -1.54            | -2.33 to -0.74        | 3             | 0.77         | -1.71 to 3.25         | 0.50          |
|                                            | 1.4 Action planning.                              | -1.33                         | -3.99 to 1.33         | 3              | -0.97            | -1.98 to 0.03         | 8             | -0.21        | -3.02 to 2.59         | 0.87          |
|                                            | 4.1 Instruction on how to perform the behaviour.  | -0.15                         | -1.78 to 1.49         | 3              | -1.53            | -2.48 to -0.58        | 8             | 1.54         | -0.49 to 3.58         | 0.12          |
|                                            | <b>5.1 Information about health consequences.</b> | <b>0.15</b>                   | <b>-1.32 to 1.63</b>  | <b>3</b>       | <b>-1.53</b>     | <b>-2.29 to -0.78</b> | <b>8</b>      | <b>1.87</b>  | <b>0.11 to 3.63</b>   | <b>0.04</b>   |
|                                            | 9.1 Credible source.                              | -0.91                         | -2.51 to 0.70         | 6              | -1.32            | -1.94 to -0.69        | 5             | 0.70         | -1.44 to 2.84         | 0.48          |
|                                            | 9.2 Pros and cons.                                | -1.46                         | -3.05 to 0.13         | 3              | -0.93            | -2.01 to 0.15         | 8             | -0.58        | -3.31 to 2.16         | 0.65          |
|                                            | 11.2 Reduced negative emotions.                   | -2.79                         | -4.60 to -0.97        | 3              | -0.68            | -1.66 to 0.30         | 8             | -2.10        | -4.81 to 0.61         | 0.12          |
|                                            | Serum total cholesterol                           | 1.1 Goal setting (behaviour). | -0.11                 | -0.18 to -0.05 | 7                | -0.10                 | -0.23 to 0.04 | 3            | -0.02                 | -0.19 to 0.15 |
| 1.4 Action planning.                       |                                                   | -0.02                         | -0.18 to 0.14         | 3              | -0.12            | -0.19 to -0.06        | 7             | 0.10         | -0.09 to 0.29         | 0.27          |
| 5.1 Information about health consequences. |                                                   | -0.11                         | -0.19 to -0.02        | 4              | -0.11            | -0.21 to -0.01        | 6             | 0.01         | -0.13 to 0.14         | 0.94          |
| 9.1 Credible source.                       |                                                   | -0.09                         | -0.16 to -0.01        | 6              | -0.14            | -0.25 to -0.03        | 4             | 0.06         | -0.08 to 0.19         | 0.39          |
| 9.2 Pros and cons.                         |                                                   | -0.07                         | -0.31 to 0.16         | 3              | -0.11            | -0.18 to -0.05        | 7             | 0.03         | -0.18 to 0.24         | 0.77          |
| Body mass index                            |                                                   | 1.4 Action planning.          | -0.33                 | -0.68 to 0.01  | 3                | -0.07                 | -0.22 to 0.07 | 7            | -0.26                 | -0.67 to 0.16 |
|                                            | 5.1 Information about health consequences.        | -0.10                         | -0.33 to 0.14         | 3              | -0.12            | -0.28 to 0.04         | 7             | 0.03         | -0.30 to 0.35         | 0.86          |
|                                            | 9.1 Credible source.                              | -0.23                         | -0.43 to -0.02        | 5              | -0.02            | -0.20 to 0.16         | 5             | -0.20        | -0.51 to 0.10         | 0.17          |
|                                            | 9.2 Pros and cons.                                | -0.47                         | -1.29 to 0.34         | 3              | -0.10            | -0.24 to 0.03         | 7             | -0.37        | -1.31 to 0.57         | 0.39          |
| Weight                                     | 1.3 Goal setting (outcome)                        | -0.97                         | -2.06 to 0.12         | 3              | -0.78            | -1.67 to 0.10         | 5             | -0.18        | -1.95 to 1.59         | 0.81          |
|                                            | <b>1.4 Action planning.</b>                       | <b>-1.30</b>                  | <b>-1.92 to -0.67</b> | <b>4</b>       | <b>-0.10</b>     | <b>-0.88 to 0.68</b>  | <b>4</b>      | <b>-1.22</b> | <b>-2.37 to -0.07</b> | <b>0.04</b>   |
|                                            | 4.1 Instruction on how to perform the behaviour.  | -0.81                         | -1.91 to 0.30         | 3              | -0.89            | -1.86 to 0.08         | 5             | 0.06         | -1.77 to 1.89         | 0.94          |
|                                            | 9.1 Credible source.                              | -0.97                         | -1.73 to -0.21        | 5              | -0.02            | -1.70 to 1.65         | 3             | -0.91        | -3.35 to 1.53         | 0.40          |
|                                            | 9.2 Pros and cons.                                | -0.91                         | -3.91 to 2.09         | 3              | -0.84            | -1.61 to -0.07        | 5             | -0.05        | -3.98 to 3.88         | 0.98          |

Note: BCT, behaviour change technique; MD, mean difference; CI, 95% confidence interval; N, number of trials;  $\beta$ , meta-regression coefficient

For peer review only - <http://bmjopen.bmj.com/site/about/guidelines.xhtml>

## DISCUSSION

This systematic review is among the first to evaluate the impact of theory use and BCTs in MHBC interventions for reducing CVD-risk. The results of this systematic review suggest that MHBC interventions evaluated to date for the primary prevention of CVD may generally have very limited effects in reducing CVD-risk and CVD risk factors in primary care populations.

Previous systematic reviews have investigated the effectiveness of interventions aimed at individual risk factors including diet, physical activity and body weight<sup>6 53</sup>. These reviews generally find that behaviour change interventions in primary care have minor impact on risk factors values. The Cochrane review up to 2011 reported modest reductions in CVD risk factors following MHBC interventions that were wlightly greater than we report<sup>5</sup>. However, the Cochrane review did not restrict the intervention setting to primary care.

Estimated changes in CVD risk factors should be viewed with caution. The observed effects were heterogeneous, therefore pooled estimates might be questionable. In the present set of trials, the average duration of follow-up was 12 months and changes in risk factors observed may be unlikely to reflect changes occurring over a longer periods. This review found reductions in blood pressure and total cholesterol following intervention, but in some instances this might be mediated by pharmacological treatment. There are clear benefits of drug treatments in lowering blood pressure and cholesterol in primary prevention populations

54 55

Although this review focused on interventions for the primary prevention population, we also included trials that recruited a small minority of participants with some evidence of CVD.

1  
2  
3 Including these trials might have biased the results, as health promotion interventions might  
4 have more positive effects in people with established cardiovascular disease <sup>56-58</sup>.  
5  
6  
7  
8  
9

10 In order to account for heterogeneity, we focused on trial level covariates and identified  
11 characteristics that might be associated with more favourable outcomes. When coding  
12 BCTs, we were limited by the lack of detail provided in reports. We only coded what was  
13 explicitly referred to in intervention descriptions and could be fitted to BCT taxonomy  
14 definitions.  
15  
16  
17  
18  
19

20  
21  
22  
23  
24 This review suggested no association between the number of intervention sessions or  
25 intervention duration and improved outcomes. Quantity of sessions would not necessarily  
26 have a beneficial impact on outcomes unless additional sessions deliver BCTs that  
27 effectively influence behaviours. Fewer reports provided sufficient information to permit  
28 calculating duration for analysis. Increasing use of the TIDieR checklist <sup>59</sup>, requiring  
29 intervention reports to detail the number and duration of sessions offered to participants, will  
30 be helpful for future reviews.  
31  
32  
33  
34  
35  
36  
37  
38  
39

40  
41 Our analyses suggested that using certain BCTs has a moderator effect on intervention  
42 outcomes. In terms of biomarkers of CVD risk, no BCTs were identified as being particularly  
43 likely to influence cholesterol levels, while including review of behaviour goals or information  
44 about health consequences appeared to be associated with slightly worse blood pressure  
45 outcomes.  
46  
47  
48  
49  
50

51  
52 “Action planning” was associated with greater weight loss, while “instruction on how to  
53 perform the behaviour” was not. Both of these findings differ to those of a previous review <sup>17</sup>,  
54 perhaps because it focused only on interventions for obese individuals. The previous review  
55  
56  
57  
58  
59  
60

1  
2  
3 also identified the BCTs of self-monitoring, relapse prevention/problem solving and prompt  
4 practice as beneficial to weight loss, but too few of the interventions included in the present  
5 review incorporated these BCTs for it to be possible to test their influence. A review of  
6 interventions promoting healthy eating and exercise also found that including the BCT of  
7 self-monitoring was associated with bigger changes in these behaviours<sup>18</sup>. Therefore, one  
8 explanation for the relatively limited effectiveness of the interventions reviewed in the  
9 present review is that they failed to include BCTs that were more likely to lead to health-  
10 promoting changes. A second possibility is that not all BCTs were delivered as the  
11 intervention designers intended. This cannot be ruled out as monitoring of treatment fidelity  
12 was rarely described in the included studies.  
13  
14  
15  
16  
17  
18  
19  
20  
21  
22  
23  
24  
25  
26

27 This review showed no association between the use of psychological theory and improved  
28 intervention outcomes. However, only a limited range of theories were employed – mostly  
29 TTM and SCT. A previous review also found that interventions based on these theories  
30 were not significantly more effective than interventions not explicitly based on theory<sup>13</sup>. A  
31 second issue is that the links between the psychological determinants specified by a theory  
32 and the BCTs employed in interventions were sometimes poorly articulated, with little  
33 evidence cited to justify choice of BCTs to change specific constructs. Furthermore, it was  
34 not always clear which BCTs were being used to target which behaviours as part of the  
35 MHBC interventions. Both this and previous reviews<sup>13 60</sup> found that reported theory use in  
36 intervention design was not as extensive as it could be. It is possible that interventions  
37 based on other theories or that more explicitly link theoretical constructs to select BCTs  
38 might be more effective.  
39  
40  
41  
42  
43  
44  
45  
46  
47  
48  
49  
50  
51  
52  
53  
54  
55  
56  
57  
58  
59  
60

## Limitations

The results of this review must be viewed with caution because of several limitations. First, the majority of trials included were undertaken in Europe (70%) and the United States (14.8%). Declines in CVD mortality and CVD-risk have been observed in these countries, and the results should be considered in the context of these trends. Groups of BCTs may have synergistic effects on behaviour<sup>16</sup>. However, due to the relatively small numbers of studies and under-description of the BCTs used in interventions, it was not possible to explore the impact of clusters of BCTs on CVD risk factors, as too few studies used the same clusters of BCTs and measured the same outcome. Behavioural risk factors were assessed by self-report and so values were subject to social desirability and recall biases. Finally, as this review involved testing for the impact of MHBC interventions and intervention characteristics on intervention outcomes, we are aware of the need to adjust p-values based on the number of tests being made<sup>61</sup>. However, tests were examining independent hypotheses, therefore the p-values were not adjusted.

## CONCLUSION

Existing multiple health behaviour change interventions delivered to individual participants in primary care appear to have limited effectiveness at reducing CVD-risk and CVD risk factors over twelve months or longer. Trial reports need to provide explicit explanation of the intervention theory, content and delivery, including fidelity, in order to understand why an intervention may or may not prove effective. This is essential for future development of effective CVD prevention interventions.

**Funding:**

MG was supported by the National Institute for Health Research (NIHR) Biomedical Research Centre at Guy's and St Thomas' NHS Foundation Trust and King's College London. SA was supported by the Government of Saudi Arabia.

**Contributorship statement:**

SA, AW and MG conceptualised and designed the study. SA and MG performed the paper search. SA and LM performed the coding. SA wrote the first draft and all authors have read and made improvements of the contents and the wording.

**Competing interests:**

There are no competing interests.

**Data sharing statement:**

No additional data are available.

## References

1. WHO. Cardiovascular diseases (CVDs). Accessed August 15, 2016.  
<http://www.who.int/mediacentre/factsheets/fs317/en/>.
2. Poortinga W. The prevalence and clustering of four major lifestyle risk factors in an English adult population. *Preventive medicine* 2007;44(2):124-28.  
doi.org/10.1016/j.ypmed.2006.10.006.
3. Cairney J, Leatherdale ST, Faulkner GE. A longitudinal examination of the interrelationship of multiple health behaviors. *American journal of preventive medicine* 2014;47(3):283-89. doi.org/10.1016/j.amepre.2014.04.019.
4. Khaw K-T, Wareham N, Bingham S, et al. Combined impact of health behaviours and mortality in men and women: the EPIC-Norfolk prospective population study. *PLoS medicine* 2008;5(1):e12. doi.org/10.1371/journal.pmed.0050012.
5. Ebrahim S, Taylor F, Ward K, et al. Multiple risk factor interventions for primary prevention of coronary heart disease. *The Cochrane Library* 2011.  
doi.org/10.1002/14651858.CD001561.pub3.
6. Fleming P, Godwin M. Lifestyle interventions in primary care Systematic review of randomized controlled trials. *Canadian family physician* 2008;54(12):1706-13.
7. Álvarez-Bueno C, Cavero-Redondo I, Martínez-Andrés M, et al. Effectiveness of multifactorial interventions in primary health care settings for primary prevention of cardiovascular disease: a systematic review of systematic reviews. *Preventive medicine* 2015;76:S68-S75. doi.org/10.1016/j.ypmed.2014.11.028.
8. Krogsbøll LT, Jørgensen KJ, Larsen CG, et al. General health checks in adults for reducing morbidity and mortality from disease: Cochrane systematic review and meta-analysis. *BMJ* 2012;345:e7191. doi.org/10.1136/bmj.e7191.
9. Michie S, Richardson M, Johnston M, et al. The behavior change technique taxonomy (v1) of 93 hierarchically clustered techniques: building an international consensus for the reporting of behavior change interventions. *Annals of behavioral medicine* 2013;46(1):81-95. doi.org/10.1007/s12160-013-9486-6.

- 1  
2  
3 10. Campbell M, Fitzpatrick R, Haines A, et al. Framework for design and evaluation of  
4 complex interventions to improve health. *BMJ* 2000;321(7262):694-96.  
5 doi.org/10.1136/bmj.321.7262.694.  
6  
7
- 8  
9 11. Michie S, Johnston M, Francis J, et al. From theory to intervention: mapping theoretically  
10 derived behavioural determinants to behaviour change techniques. *Applied*  
11 *psychology* 2008;57(4):660-80. doi.org/10.1111/j.1464-0597.2008.00341.x.  
12  
13
- 14 12. Webb T, Joseph J, Yardley L, et al. Using the internet to promote health behavior  
15 change: a systematic review and meta-analysis of the impact of theoretical basis, use  
16 of behavior change techniques, and mode of delivery on efficacy. *Journal of medical*  
17 *Internet research* 2010;12(1):e4. doi.org/10.2196/jmir.1376.  
18  
19
- 20  
21 13. Prestwich A, Sniehotta FF, Whittington C, et al. Does theory influence the effectiveness  
22 of health behavior interventions? Meta-analysis. *Health Psychology* 2014;33(5):465.  
23 doi.org/10.1037/a0032853.  
24  
25
- 26  
27 14. Prestwich A, Webb TL, Conner M. Using theory to develop and test interventions to  
28 promote changes in health behaviour: evidence, issues, and recommendations.  
29 *Current Opinion in Psychology* 2015;5:1-5. doi.org/10.1016/j.copsyc.2015.02.011.  
30  
31
- 32 15. Michie S, Atkins L, West R. The behaviour change wheel: a guide to designing  
33 interventions. Great Britain: Silverback Publishing 2015.  
34  
35
- 36  
37 16. Michie S, Fixsen D, Grimshaw JM, et al. Specifying and reporting complex behaviour  
38 change interventions: the need for a scientific method. *Implement Sci* 2009;4(40):1-6.  
39 doi.org/10.1186/1748-5908-4-40.  
40  
41
- 42 17. Dombrowski SU, Sniehotta FF, Avenell A, et al. Identifying active ingredients in complex  
43 behavioural interventions for obese adults with obesity-related co-morbidities or  
44 additional risk factors for co-morbidities: a systematic review. *Health Psychology*  
45 *Review* 2012;6(1):7-32. doi.org/10.1080/17437199.2010.513298.  
46 doi.org/10.1080/17437199.2010.513298.  
47  
48
- 49  
50 18. Michie S, Abraham C, Whittington C, et al. Effective techniques in healthy eating and  
51 physical activity interventions: a meta-regression. *Health Psychology* 2009;28(6):690.  
52 doi.org/10.1037/a0016136.  
53  
54  
55  
56  
57  
58  
59  
60



- 1  
2  
3 19. Higgins JP, Altman DG, Gøtzsche PC, et al. The Cochrane Collaboration's tool for  
4 assessing risk of bias in randomised trials. *BMJ* 2011;343.  
5 doi.org/10.1136/bmj.d5928.  
6  
7  
8  
9 20. Michie S, Prestwich A. Are interventions theory-based? Development of a theory coding  
10 scheme. *Health Psychology* 2010;29(1):1. doi.org/10.1037/a0016939.  
11  
12  
13 21. Bishop FL, Fenge-Davies AL, Kirby S, et al. Context effects and behaviour change  
14 techniques in randomised trials: A systematic review using the example of trials to  
15 increase adherence to physical activity in musculoskeletal pain. *Psychology & health*  
16 2015;30(1):104-21. doi.org/10.1080/08870446.2014.953529.  
17  
18  
19 22. Egger M, Smith GD, Schneider M, et al. Bias in meta-analysis detected by a simple,  
20 graphical test. *BMJ* 1997;315(7109):629-34.  
21  
22  
23 23. Mendis S, Johnston SC, Fan W, et al. Cardiovascular risk management and its impact  
24 on hypertension control in primary care in low-resource settings: a cluster-  
25 randomized trial. *Bulletin of the World Health Organization* 2010;88(6):412-19.  
26  
27  
28  
29 24. Lakerveld J, Bot SD, Chinapaw MJ, et al. Motivational interviewing and problem solving  
30 treatment to reduce type 2 diabetes and cardiovascular disease risk in real life: a  
31 randomized controlled trial. *Int J Behav Nutr Phys Act* 2013;10(47):10.1186.  
32 doi.org/10.1186/1479-5868-10-47.  
33  
34  
35  
36 25. Hardcastle SJ, Taylor AH, Bailey MP, et al. Effectiveness of a motivational interviewing  
37 intervention on weight loss, physical activity and cardiovascular disease risk factors:  
38 a randomised controlled trial with a 12-month post-intervention follow-up. *Int J Behav*  
39 *Nutr Phys Act* 2013;10(40):1-16. doi.org/10.1186/1479-5868-10-40.  
40  
41  
42  
43 26. Parra-Medina D, Wilcox S, Salinas J, et al. Results of the Heart Healthy and Ethnically  
44 Relevant Lifestyle trial: a cardiovascular risk reduction intervention for African  
45 American women attending community health centers. *American journal of public*  
46 *health* 2011;101(10):1914-21. doi.org/ 10.2105/AJPH.2011.300151.  
47  
48  
49  
50 27. Harting J, van Assema P, van Limpt P, et al. Cardiovascular prevention in the Hartslag  
51 Limburg project: effects of a high-risk approach on behavioral risk factors in a general  
52 practice population. *Preventive medicine* 2006;43(5):372-78.  
53 doi.org/10.1016/j.ypmed.2006.06.016.  
54  
55  
56  
57  
58  
59  
60

- 1  
2  
3 28. OXCHECK. Effectiveness of health checks conducted by nurses in primary care: final  
4 results of the OXCHECK study. *BMJ* 1995;1099-104.  
5 doi.org/10.1136/bmj.310.6987.1099.  
6  
7  
8  
9 29. Knutsen SF, Knutsen R. The Tromsø Survey: the Family Intervention study—the effect  
10 of intervention on some coronary risk factors and dietary habits, a 6-year follow-up.  
11 *Preventive medicine* 1991;20(2):197-212. doi.org/10.1016/0091-7435(91)90020-5.  
12  
13  
14 30. Meland E, Lærum E, Ulvik RJ. Effectiveness of two preventive interventions for coronary  
15 heart disease in primary care. *Scandinavian journal of primary health care*  
16 1997;15(1):57-63. doi.org/10.3109/02813439709043432.  
17  
18  
19  
20 31. Sartorelli DS, Sciarra EC, Franco LJ, et al. Beneficial effects of short-term nutritional  
21 counselling at the primary health-care level among Brazilian adults. *Public health*  
22 *nutrition* 2005;8(07):820-25. doi.org/10.1079/PHN2005737  
23  
24  
25 32. Koelewijn-van Loon MS, van der Weijden T, van Steenkiste B, et al. Involving patients in  
26 cardiovascular risk management with nurse-led clinics: a cluster randomized  
27 controlled trial. *Canadian Medical Association Journal* 2009;181(12):E267-E74.  
28 doi.org/10.1503/cmaj.081591.  
29  
30  
31  
32 33. Brett T, Arnold-Reed D, Phan C, et al. The Fremantle Primary Prevention Study: a  
33 multicentre randomised trial of absolute cardiovascular risk reduction. *Br J Gen Pract*  
34 2012;62(594):e22-e28. doi.org/ 10.3399/bjgp12X616337.  
35  
36  
37  
38 34. Steptoe A, Day S, Doherty S, et al. Behavioural counselling in general practice for the  
39 promotion of healthy behaviour among adults at increased risk of coronary heart  
40 disease: randomised trial  
41 Commentary: Treatment allocation by the method of  
42 minimisation. *BMJ* 1999;319(7215):943-48.  
43  
44  
45 35. Eriksson MK, Franks PW, Eliasson M. A 3-year randomized trial of lifestyle intervention  
46 for cardiovascular risk reduction in the primary care setting: the Swedish Björknäs  
47 study. *PloS one* 2009;4(4):e5195. doi.org/10.1371/journal.pone.0005195.  
48  
49  
50 36. Ma J, Berra K, Haskell WL, et al. Case management to reduce risk of cardiovascular  
51 disease in a county health care system. *Archives of internal medicine*  
52 2009;169(21):1988-95. doi.org//10.1001\_archinternmed.2009.381.  
53  
54  
55  
56  
57  
58  
59  
60

- 1  
2  
3 37. Tiessen AH, Smit AJ, Broer J, et al. Randomized controlled trial on cardiovascular risk  
4 management by practice nurses supported by self-monitoring in primary care. *BMC*  
5 *family practice* 2012;13(1):1. doi.org/10.1186/1471-2296-13-90.  
6  
7  
8  
9 38. Drevenhorn E, Bengtson A, Nilsson PM, et al. Consultation training of nurses for  
10 cardiovascular prevention—a randomized study of 2 years duration. *Blood pressure*  
11 2012;21(5):293-99. doi.org/10.3109/08037051.2012.680734.  
12  
13  
14 39. Baron JA, Gleason R, Crowe B, et al. Preliminary trial of the effect of general practice  
15 based nutritional advice. *Br J Gen Pract* 1990;40(333):137-41.  
16  
17  
18 40. Kranjčević K, Marković BB, Lalić DI, et al. Is a targeted and planned GP intervention  
19 effective in cardiovascular disease prevention? A randomized controlled trial. *Medical*  
20 *science monitor: international medical journal of experimental and clinical research*  
21 2014;20:1180. doi.org/10.12659/MSM.890242.  
22  
23  
24  
25 41. Harris MF, Fanaian M, Jayasinghe UW, et al. A cluster randomised controlled trial of  
26 vascular risk factor management in general practice. *Med J Aust* 2012;197(7):387-  
27 93. doi.org/10.5694/mja12.10313.  
28  
29  
30  
31 42. Korhonen M, Kastarinen M, Uusitupa M, et al. The effect of intensified diet counseling on  
32 the diet of hypertensive subjects in primary health care: a 2-year open randomized  
33 controlled trial of lifestyle intervention against hypertension in eastern Finland.  
34 *Preventive medicine* 2003;36(1):8-16. doi.org/10.1006/pmed.2002.1120.  
35  
36  
37  
38 43. Nilsson PM, Lindholm LH, Scherstén BF. Life style changes improve insulin resistance in  
39 hyperinsulinaemic subjects: a one-year intervention study of hypertensives and  
40 normotensives in Dalby. *Journal of hypertension* 1992;10(9):1071-78.  
41  
42  
43  
44 44. Avram C, Iurciuc M, Craciun L, et al. Dietary and physical activity counseling in high-risk  
45 asymptomatic patients with metabolic syndrome—A primary care intervention. *Journal*  
46 *of Food, Agriculture & Environment* 2011;9(3&4):16-19.  
47  
48  
49 45. Lindholm LH, Ekblom T, Dash C, et al. The impact of health care advice given in primary  
50 care on cardiovascular risk. *BMJ* 1995;310(6987):1105-09.  
51  
52  
53 46. Kannel WB, McGee D, Gordon T. A general cardiovascular risk profile: the Framingham  
54 Study. *The American journal of cardiology* 1976;38(1):46-51.  
55  
56  
57  
58  
59  
60

- 1  
2  
3 47. Wood D, Kinmonth A, Davies G, et al. Randomised controlled trial evaluating  
4 cardiovascular screening and intervention in general practice: principal results of  
5 British family heart study. *BMJ* 1994;308(6924):313-20.  
6 doi.org/10.1136/bmj.308.6924.313  
7  
8  
9  
10 48. Tunstall-Pedoe H. The Dundee coronary risk-disk for management of change in risk  
11 factors. *BMJ* 1991;303(6805):744-47.  
12  
13  
14 49. Conroy R, Pyörälä K, Fitzgerald Ae, et al. Estimation of ten-year risk of fatal  
15 cardiovascular disease in Europe: the SCORE project. *European heart journal*  
16 2003;24(11):987-1003. [http://dx.doi.org/10.1016/S0195-668X\(03\)00114-3](http://dx.doi.org/10.1016/S0195-668X(03)00114-3).  
17  
18  
19 50. Prochaska JO, Norcross JC. Stages of change. *Psychotherapy: Theory, research,*  
20 *practice, training* 2001;38(4):443.  
21  
22  
23 51. Bandura A. *Social foundations of thought and action: A social cognitive theory*: Prentice-  
24 Hall, Inc, 1986.  
25  
26  
27 52. Vetter ML, Wadden TA, Chittams J, et al. Effect of lifestyle intervention on  
28 cardiometabolic risk factors: results of the POWER-UP trial. *International Journal of*  
29 *Obesity* 2013;37:S19-S24. doi.org/10.1038/ijo.2013.92.  
30  
31  
32 53. Booth HP, Prevost TA, Wright AJ, et al. Effectiveness of behavioural weight loss  
33 interventions delivered in a primary care setting: a systematic review and meta-  
34 analysis. *Family practice* 2014;31(6):643-53. doi.org/10.1093/fampra/cmu064.  
35  
36  
37 54. Trialists CT. Efficacy and safety of cholesterol-lowering treatment: prospective meta-  
38 analysis of data from 90 056 participants in 14 randomised trials of statins. *The*  
39 *Lancet* 2005;366(9493):1267-78. doi.org/10.1016/S0140-6736(05)67394-1.  
40  
41  
42 55. Taylor F, Huffman MD, Macedo AF, et al. Statins for the primary prevention of  
43 cardiovascular disease. *The Cochrane Library* 2013.  
44 doi.org/10.1002/14651858.CD004816.pub4.  
45  
46  
47 56. Oldridge NB, Guyatt GH, Fischer ME, et al. Cardiac rehabilitation after myocardial  
48 infarction: combined experience of randomized clinical trials. *JAMA* 1988;260(7):945-  
49 50. doi.org/10.1001/jama.1988.03410070073031.  
50  
51  
52 57. Taylor RS, Brown A, Ebrahim S, et al. Exercise-based rehabilitation for patients with  
53 coronary heart disease: systematic review and meta-analysis of randomized  
54  
55  
56  
57  
58  
59  
60

- 1  
2  
3 controlled trials. *The American journal of medicine* 2004;116(10):682-92.  
4 doi.org/10.1016/j.amjmed.2004.01.009.  
5  
6  
7 58. Mullen PD, Mains DA, Velez R. A meta-analysis of controlled trials of cardiac patient  
8 education. *Patient education and counseling* 1992;19(2):143-62.  
9 .doi.org/10.1016/0738-3991(92)90194-N.  
10  
11  
12 59. Hoffmann TC, Glasziou PP, Boutron I, et al. Better reporting of interventions: template  
13 for intervention description and replication (TIDieR) checklist and guide. *BMJ*  
14 2014;348:g1687. doi.org/10.1136/bmj.g1687.  
15  
16  
17  
18 60. Michie S, Jochelson K, Markham WA, et al. Low income groups and behaviour change  
19 interventions: a review of intervention content, effectiveness and theoretical  
20 frameworks. *Journal of Epidemiology and Community Health* 2009;jech.  
21 2008.078725. doi.org/10.1136/jech.2008.078725.  
22  
23  
24  
25 61. Bland JM, Altman DG. Multiple significance tests: the Bonferroni method. *BMJ*  
26 1995;310(6973):170. doi.org/10.1136/bmj.310.6973.170.  
27  
28  
29  
30  
31  
32  
33  
34  
35  
36  
37  
38  
39  
40  
41  
42  
43  
44  
45  
46  
47  
48  
49  
50  
51  
52  
53  
54  
55  
56  
57  
58  
59  
60

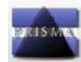

## PRISMA 2009 Checklist

| Section/topic                      | #  | Checklist item                                                                                                                                                                                                                                                                                              | Reported on page # |
|------------------------------------|----|-------------------------------------------------------------------------------------------------------------------------------------------------------------------------------------------------------------------------------------------------------------------------------------------------------------|--------------------|
| <b>TITLE</b>                       |    |                                                                                                                                                                                                                                                                                                             |                    |
| Title                              | 1  | Identify the report as a systematic review, meta-analysis, or both.                                                                                                                                                                                                                                         | 1                  |
| <b>ABSTRACT</b>                    |    |                                                                                                                                                                                                                                                                                                             |                    |
| Structured summary                 | 2  | Provide a structured summary including, as applicable: background; objectives; data sources; study eligibility criteria, participants, and interventions; study appraisal and synthesis methods; results; limitations; conclusions and implications of key findings; systematic review registration number. | 2                  |
| <b>INTRODUCTION</b>                |    |                                                                                                                                                                                                                                                                                                             |                    |
| Rationale                          | 3  | Describe the rationale for the review in the context of what is already known.                                                                                                                                                                                                                              | 3 & 4              |
| Objectives                         | 4  | Provide an explicit statement of questions being addressed with reference to participants, interventions, comparisons, outcomes, and study design (PICOS).                                                                                                                                                  | 4 - 6              |
| <b>METHODS</b>                     |    |                                                                                                                                                                                                                                                                                                             |                    |
| Protocol and registration          | 5  | Indicate if a review protocol exists, if and where it can be accessed (e.g., Web address), and, if available, provide registration information including registration number.                                                                                                                               | N/A                |
| Eligibility criteria               | 6  | Specify study characteristics (e.g., PICOS, length of follow-up) and report characteristics (e.g., years considered, language, publication status) used as criteria for eligibility, giving rationale.                                                                                                      | 6 & 7              |
| Information sources                | 7  | Describe all information sources (e.g., databases with dates of coverage, contact with study authors to identify additional studies) in the search and date last searched.                                                                                                                                  | 7                  |
| Search                             | 8  | Present full electronic search strategy for at least one database, including any limits used, such that it could be repeated.                                                                                                                                                                               | Appendix A         |
| Study selection                    | 9  | State the process for selecting studies (i.e., screening, eligibility, included in systematic review, and, if applicable, included in the meta-analysis).                                                                                                                                                   | 7                  |
| Data collection process            | 10 | Describe method of data extraction from reports (e.g., piloted forms, independently, in duplicate) and any processes for obtaining and confirming data from investigators.                                                                                                                                  | 7 & 8              |
| Data items                         | 11 | List and define all variables for which data were sought (e.g., PICOS, funding sources) and any assumptions and simplifications made.                                                                                                                                                                       | 7 & 8              |
| Risk of bias in individual studies | 12 | Describe methods used for assessing risk of bias of individual studies (including specification of whether this was done at the study or outcome level), and how this information is to be used in any data synthesis.                                                                                      | 7 & 14             |

|                               |    |                                                                                                                                                                                                          |                         |
|-------------------------------|----|----------------------------------------------------------------------------------------------------------------------------------------------------------------------------------------------------------|-------------------------|
| Summary measures              | 13 | State the principal summary measures (e.g., risk ratio, difference in means).                                                                                                                            | 8 & 9                   |
| Synthesis of results          | 14 | Describe the methods of handling data and combining results of studies, if done, including measures of consistency (e.g., $I^2$ ) for each meta-analysis.                                                | 8 & 9                   |
| Risk of bias across studies   | 15 | Specify any assessment of risk of bias that may affect the cumulative evidence (e.g., publication bias, selective reporting within studies).                                                             | 9                       |
| Additional analyses           | 16 | Describe methods of additional analyses (e.g., sensitivity or subgroup analyses, meta-regression), if done, indicating which were pre-specified.                                                         | 8 & 9                   |
| <b>RESULTS</b>                |    |                                                                                                                                                                                                          |                         |
| Study selection               | 17 | Give numbers of studies screened, assessed for eligibility, and included in the review, with reasons for exclusions at each stage, ideally with a flow diagram.                                          | 10 and figure 1         |
| Study characteristics         | 18 | For each study, present characteristics for which data were extracted (e.g., study size, PICOS, follow-up period) and provide the citations.                                                             | Supplementary table 1&2 |
| Risk of bias within studies   | 19 | Present data on risk of bias of each study and, if available, any outcome level assessment (see item 12).                                                                                                | Supplementary table 3   |
| Results of individual studies | 20 | For all outcomes considered (benefits or harms), present, for each study: (a) simple summary data for each intervention group (b) effect estimates and confidence intervals, ideally with a forest plot. | Appendix B              |
| Synthesis of results          | 21 | Present results of each meta-analysis done, including confidence intervals and measures of consistency.                                                                                                  | 15                      |
| Risk of bias across studies   | 22 | Present results of any assessment of risk of bias across studies (see Item 15).                                                                                                                          | 16-20                   |
| Additional analysis           | 23 | Give results of additional analyses, if done (e.g., sensitivity or subgroup analyses, meta-regression [see Item 16]).                                                                                    | 19 - 21                 |
| <b>DISCUSSION</b>             |    |                                                                                                                                                                                                          |                         |
| Summary of evidence           | 24 | Summarize the main findings including the strength of evidence for each main outcome; consider their relevance to key groups (e.g., healthcare providers, users, and policy makers).                     | 22                      |
| Limitations                   | 25 | Discuss limitations at study and outcome level (e.g., risk of bias), and at review-level (e.g., incomplete retrieval of identified research, reporting bias).                                            | 25                      |
| Conclusions                   | 26 | Provide a general interpretation of the results in the context of other evidence, and implications for future research.                                                                                  | 25                      |
| <b>FUNDING</b>                |    |                                                                                                                                                                                                          |                         |
| Funding                       | 27 | Describe sources of funding for the systematic review and other support (e.g., supply of data); role of funders for the systematic review.                                                               | 25                      |

1  
2  
3  
4  
5  
6  
7  
8  
9  
10  
11  
12  
13  
14  
15  
16  
17  
18  
19  
20  
21  
22  
23  
24  
25  
26  
27  
28  
29  
30  
31  
32  
33  
34  
35  
36  
37  
38  
39  
40  
41  
42  
43  
44  
45  
46  
47  
48  
49

*From:* Moher D, Liberati A, Tetzlaff J, Altman DG, The PRISMA Group (2009). Preferred Reporting Items for Systematic Reviews and Meta-Analyses: The PRISMA Statement. PLoS Med 6(7): e1000097. doi:10.1371/journal.pmed100009

For peer review only



1  
2  
3  
4  
5  
6  
7  
8  
9  
10  
11  
12  
13  
14  
15  
16  
17  
18  
19  
20  
21  
22  
23  
24  
25  
26  
27  
28  
29  
30  
31  
32  
33  
34  
35  
36  
37  
38  
39  
40  
41  
42  
43  
44  
45  
46  
47  
48  
49

For peer review only

1  
2  
3 **Appendix A**  
4  
5

6 Search strategy  
7  
8

9 **CENTRAL search strategy**

| ID  | Search Hits                                                       |      |
|-----|-------------------------------------------------------------------|------|
| #1  | MeSH descriptor CARDIOVASCULAR DISEASES this term only            | 480  |
| #2  | MeSH descriptor CORONARY DISEASE explode all trees                | 356  |
| #3  | cardiovascular in All Text                                        | 2052 |
| #4  | (coronary in All Text near/3 disease* in All Text)                | 9    |
| #5  | (heart in All Text near/3 disease* in All Text)                   | 11   |
| #6  | MeSH descriptor HYPERTENSION this term only                       | 643  |
| #7  | hypertension in All Text                                          | 1781 |
| #8  | (atherosclerosis in All Text or arteriosclerosis in All Text)     | 258  |
| #9  | (hyperlipidaemia in All Text or hyperlipidemia in All Text)       | 224  |
| #10 | MeSH descriptor ARTERIOSCLEROSIS explode all trees                | 79   |
| #11 | MeSH descriptor CHOLESTEROL explode trees all trees               | 209  |
| #12 | MeSH descriptor HYPERLIPIDEMIA explode all trees                  | 33   |
| #13 | cholesterol in All Text                                           | 630  |
| #14 | multiple next risk next factor* in All Text                       | 51   |
| #15 | coronary next risk next factor* in All Text                       | 30   |
| #16 | (#1 or #2 or #3 or #4 or #5 or #6 or #7 or #8 or #9 or #10)       | 3105 |
| #17 | (#11 or #12 or #13 or #14 or #15)                                 | 682  |
| #18 | (#16 or #17)                                                      | 3234 |
| #19 | MeSH descriptor HEALTH EDUCATION explode all trees                | 630  |
| #20 | MeSH descriptor HEALTH PROMOTION explode all trees                | 191  |
| #21 | MeSH descriptor HEALTH BEHAVIOR explode all trees                 | 215  |
| #22 | MeSH descriptor PRIMARY PREVENTION this term only                 | 1021 |
| #23 | MeSH descriptor COUNSELLING this term only                        | 237  |
| #24 | counsel* in All Text                                              | 1186 |
| #25 | (health in All Text near/3 educat* in All Text)                   | 31   |
| #26 | (patient in All Text near/3 educat* in All Text)                  | 20   |
| #27 | (education* in All Text near/3 program* in All Text)              | 23   |
| #28 | (health in All Text near/3 promotion* in All Text)                | 2    |
| #29 | (health in All Text near/3 behaviour* in All Text)                | 11   |
| #30 | (health in All Text near/3 behavior* in All Text)                 | 9    |
| #31 | primary next prevention in All Text                               | 379  |
| #32 | (multiple next risk in All Text near/3 intervention* in All Text) | 6    |
| #33 | (multifactor* in All Text near/3 intervention* in All Text)       | 9    |
| #34 | (multifactor* in All Text near/3 prevention in All Text)          | 1    |
| #35 | (risk next factor* in All Text near/3 reduc* in All Text)         | 10   |
| #36 | (risk next factor* in All Text near/3 manag* in All Text)         | 20   |
| #37 | (risk next factor* in All Text near/3 intervent* in All Text)     | 49   |

|    |             |                                                                                      |
|----|-------------|--------------------------------------------------------------------------------------|
| 1  |             |                                                                                      |
| 2  |             |                                                                                      |
| 3  | #38         | (lifestyle in All Text near/3 intervention* in All Text) 34                          |
| 4  | #39         | (lifestyle in All Text near/3 advice in All Text) 6                                  |
| 5  | #40         | (life-style in All Text near/3 intervention* in All Text) 12                         |
| 6  | #41         | (life-style in All Text near/3 advice in All Text) 2                                 |
| 7  | #42         | (life-style in All Text near/3 alter* in All Text) 1                                 |
| 8  | #43         | (lifestyle in All Text near/3 alter* in All Text) 5                                  |
| 9  | #44         | (lifestyle in All Text near/3 educat* in All Text) 15                                |
| 10 | #45         | (life-style in All Text near/3 educat* in All Text) 5                                |
| 11 | #46         | (life-style in All Text near/3 chang* in All Text) 8                                 |
| 12 | #47         | (lifestyle in All Text near/3 chang* in All Text) 18                                 |
| 13 | #48         | (behavior* in All Text near/3 chang* in All Text) 24                                 |
| 14 | #49         | (behaviour* in All Text near/3 chang* in All Text) 37                                |
| 15 | #50         | (health next care in All Text near/3 advice in All Text) 7                           |
| 16 | #51         | (healthcare in All Text near/3 advice in All Text) 8                                 |
| 17 | #52         | nonpharmacologic* in All Text 46                                                     |
| 18 | #53         | non-pharmacologic* in All Text 562                                                   |
| 19 | #54         | (#19 or #20 or #21 or #22 or #23 or #24 or #25 or #26 or #27 or #28 or #29)          |
| 20 |             | 2311                                                                                 |
| 21 | #55         | (#30 or #31 or #32 or #33 or #34 or #35 or #36 or #37 or #38 or #39) 451             |
| 22 | #56         | (#40 or #41 or #42 or #43 or #44 or #45 or #46 or #47 or #48 or #49 or #50 or #51 or |
| 23 | #52 or #53) | 646                                                                                  |
| 24 | #57         | (#54 or #55 or #56) 2915                                                             |
| 25 | #58         | (#18 and #57) 1293                                                                   |

### Embase search strategy

1. cardiovascular disease/
2. exp ischemic heart disease/
3. (Coronary adj3 disease\$.tw.
4. heart disease\$.tw.
5. Hypertension/
6. hypertension.tw.
7. (cardiovascular adj3 (disease\$ or fit of fitness)).tw.
8. exp arteriosclerosis/
9. exp hyperlipidemia/
10. hyperlipid?emia.tw.
11. cholesterol.tw.
12. arteriosclero\$.tw.
13. atherosclero\$.tw.
14. coronary risk factor\$.tw.
15. multiple risk factor\$.tw.
16. cardiovascular risk factor\$.tw.
17. or/1-16
18. exp health education/
19. exp health behavior/

- 1
- 2
- 3 20. primary prevention/
- 4 21. exp counseling/
- 5 22. (multifactor\$ adj5 (intervent\$ or prevent\$)).tw.
- 6 23. ((life-style or life style or lifestyle or healthcare or health care) adj3 (intervention\$ or
- 7 educat\$ or advice or alter\$ or change\$)).tw.
- 8
- 9 24. primary prevention.tw.
- 10 25. (risk factor\$ adj3 (reduc\$ or manage\$ or managing or intervent\$ or program\$)).tw.
- 11 26. (educat\$ adj3 (program\$ or patient\$)).tw.
- 12 27. (non pharmacologic\$ or nonpharmacologic\$).tw.
- 13 28. (risk factor\$ adj3 modif\$).tw.
- 14 29. ((lifestyle or life-style or life style) adj3 modif\$).tw.
- 15 30. exp behavior therapy/
- 16 31. (behavi?r\$ adj3 (intervention\$ or program\$ or modif\$ or change\$ or alter\$)).tw.
- 17 32. (promot\$ adj3 (health or healthcare or health care)).tw.
- 18 33. or/18-32
- 19 34. 17 and 33
- 20 35. random\$.ti,ab.
- 21 36. factorial\$.ti,ab.
- 22 37. (crossover\$ or cross over\$ or cross-over\$).ti,ab.
- 23 38. placebo\$.ti,ab.
- 24 39. (double\$ adj blind\$).ti,ab.
- 25 40. (singl\$ adj blind\$).ti,ab.
- 26 41. assign\$.ti,ab.
- 27 42. allocat\$.ti,ab.
- 28 43. volunteer\$.ti,ab.
- 29 44. Crossover Procedure/
- 30 45. Double Blind Procedure/
- 31 46. Randomized Controlled Trial/
- 32 47. Single Blind Procedure/
- 33 48. or/35-47
- 34 49. exp animal/
- 35 50. nonhuman/
- 36 51. exp animal experiment/
- 37 52. or/49-51
- 38 53. exp human/
- 39 54. 52 not 53
- 40 55. 48 not 54
- 41 56. 55 and 34
- 42 57. limit 56 to yr="2006 -Current"
- 43
- 44
- 45
- 46
- 47
- 48
- 49
- 50
- 51
- 52
- 53

#### Medline search strategy

- 54 1. Cardiovascular Diseases/
- 55 2. exp coronary disease/
- 56 3. Hypertension/
- 57
- 58
- 59
- 60

- 1
- 2
- 3 4. exp Arteriosclerosis/
- 4 5. exp Hyperlipidemia/
- 5 6. (cardiovascular adj3 disease\$.tw.
- 6 7. (cardiovascular adj3 (fit or fitness)).tw.
- 7 8. (Coronary adj3 disease\$.tw.
- 8 9. heart disease\$.tw.
- 9 10. hypertension.tw.
- 10 11. hyperlipid?emia.tw.
- 11 12. cholesterol.tw.
- 12 13. atherosclerosis.tw.
- 13 14. arteriosclerosis.tw.
- 14 15. coronary risk factor\$.tw.
- 15 16. multiple risk factor\$.tw.
- 16 17. cardiovascular risk factor\$.tw.
- 17 18. or/1-17
- 18 19. health promotion/
- 19 20. exp health education/
- 20 21. exp health behavior/
- 21 22. exp counseling/
- 22 23. Primary Prevention/
- 23 24. (multifactor\$ adj5 (intervent\$ or prevent\$)).tw.
- 24 25. ((lifestyle or life-style) adj3 (intervention\$ or educat\$ or advice\$ or alter\$ or
- 25 26. change\$)).tw.
- 26 27. ((lifestye or life-style or behavior?r\$) adj3 (intervention\$ or educat\$ or advice\$ or alter\$
- 27 28. or change\$)).tw.
- 28 29. ((healthcare or health care) adj3 advice).tw.
- 29 30. primary prevention.tw.
- 30 31. (risk factor\$ adj3 (reduc\$ or manage\$ or managing or intervent\$ or program\$)).tw.
- 31 32. (educat\$ adj3 (program\$ or patient\$)).tw.
- 32 33. ((health or healthcare or health care) adj3 (educat\$ or advice\$ or promot\$)).tw.
- 33 34. (nonpharmacologic\$ or non-pharmacologic\$).tw.
- 34 35. ((lifestyle or life style or life-style or behavio?r\$ or risk factor\$) adj3 modif\$).tw.
- 35 36. or/19-33
- 36 37. 18 and 34
- 37 38. randomized controlled trial.pt.
- 38 39. controlled clinical trial.pt.
- 39 40. Randomized controlled trials/
- 40 41. random allocation.sh.
- 41 42. double blind method.sh.
- 42 43. single-blind method.sh.
- 43 44. or/36-41
- 44 45. clinical trial.pt.
- 45 46. exp Clinical trial/
- 46 47. (clin\$ adj25 trial\$.ti,ab.
- 47
- 48
- 49
- 50
- 51
- 52
- 53
- 54
- 55
- 56
- 57
- 58
- 59
- 60

1  
2  
3 46. ((singl\$ or doubl\$ or trebl\$ or tripl\$) adj (blind\$ or mask\$)).ti,ab.

4 47. placebos.sh.

5 48. placebo\$.ti,ab.

6 49. random\$.ti,ab.

7 50. research design.sh.

8 51. or/43-50

9 52. exp animal/ not humans/

10 53. 42 or 51

11 54. 53 not 52

12 55. 54 and 35

13  
14  
15 **PsycINFO search strategy:**

16 1. cardiovascular disease.mp.

17 2. hypertension.mp.

18 3. (Coronary adj3 disease\$.mp.

19 4. heart disease\$.mp.

20 5. (cardiovascular adj3 (disease\$ or fit of fitness)).mp. [mp=title, abstract, heading word,  
21 table of contents, key concepts, original title, tests & measures]

22 6. exp Arteriosclerosis/

23 7. hyperlipid?emia.mp.

24 8. cholesterol.mp.

25 9. arteriosclero\$.mp.

26 10. atherosclero\$.mp.

27 11. coronary risk factor\$.mp.

28 12. multiple risk factor\$.mp.

29 13. cardiovascular risk factor\$.mp.

30 14. or/1-13

31 15. exp health education/

32 16. exp health education/

33 17. exp health promotion/

34 18. exp preventive medicine/

35 19. exp counseling/

36 20. primary prevention.mp.

37 21. (multifactor\$ adj5 (intervent\$ or prevent\$)).mp.

38 22. behavior change.mp.

39 23. exp Obesity/ or exp Food Intake/ or diet intervention.mp. or exp Weight Loss/ or exp  
40 Diets/ or exp Overweight/ or exp Weight Control/ or exp Nutrition/

41 24. exp Nicotine/ or exp Tobacco Smoking/ or exp Smoking Cessation/ or cigarette.mp. or  
42 exp Drug Dependency/

43 25. exp Alcohol Drinking Patterns/ or exp Drinking Behavior/ or exp Alcohol Drinking  
44 Attitudes/ or exp Binge Drinking/ or drinking.mp.

45 26. exp Physical Activity/ or exp Intervention/ or exp Exercise/ or exp Physical Fitness/ or  
46 exp Motor Performance/ or physical training.mp.

47 27. 23 and 24

48 28. 23 and 25

- 1  
2  
3 29. 23 and 26  
4 30. 24 and 25  
5 31. 24 and 26  
6 32. 25 and 26  
7  
8 33. ((life-style or life style or lifestyle or healthcare or health care) adj3 (intervention\$ or  
9 educat\$ or advice or alter\$ or change\$)).mp.  
10  
11 34. primary prevention.mp.  
12 35. (risk factor\$ adj3 (reduc\$ or manage\$ or managing or intervent\$ or program\$)).sh.  
13 36. (educat\$ adj3 (program\$ or patient\$)).mp.  
14 37. (non pharmacologic\$ or nonpharmacologic\$).mp.  
15 38. (risk factor\$ adj3 modif\$).mp.  
16 39. ((lifestyle or life-style or life style) adj3 modif\$).mp.  
17 40. (behavi?r\$ adj3 (intervention\$ or program\$ or modif\$ or change\$ or alter\$)).mp.  
18 41. (promot\$ adj3 (health or healthcare or health care)).mp.  
19 42. 15 or 16 or 17 or 18 or 19 or 20 or 21 or 22 or 27 or 28 or 29 or 30 or 31 or 32 or 33 or 34  
20 or 35 or 36 or 37 or 38 or 39 or 40 or 41  
21 43. 14 and 42  
22 44. random\$.ti,ab.  
23 45. factorial\$.ti,ab.  
24 46. (crossover\$ or cross over\$ or cross-over\$).ti,ab.  
25 47. placebo\$.ti,ab.  
26 48. (double\$ adj blind\$).ti,ab.  
27 49. (singl\$ adj blind\$).ti,ab.  
28 50. assign\$.ti,ab.  
29 51. allocat\$.ti,ab.  
30 52. volunteer\$.ti,ab.  
31 53. ("double-blind" or "random\* assigned" or control).mp.  
32 54. treatment effectiveness evaluation.mp.  
33 55. treatment outcome clinical trial\$.mp.  
34 56. (controlled trial\$ and clinical trial\$).mp. [mp=title, abstract, heading word, table of  
35 contents, key concepts, original title, tests & measures]  
36 57. 44 or 45 or 46 or 47 or 48 or 49 or 50 or 51 or 52 or 53 or 54 or 55 or 56  
37 58. 43 and 57  
38  
39  
40  
41  
42  
43  
44  
45  
46  
47  
48  
49  
50  
51  
52  
53  
54  
55  
56  
57  
58  
59  
60

## Appendix B

Forest plots of pooled effect of multiple behaviour interventions on intervention outcomes.

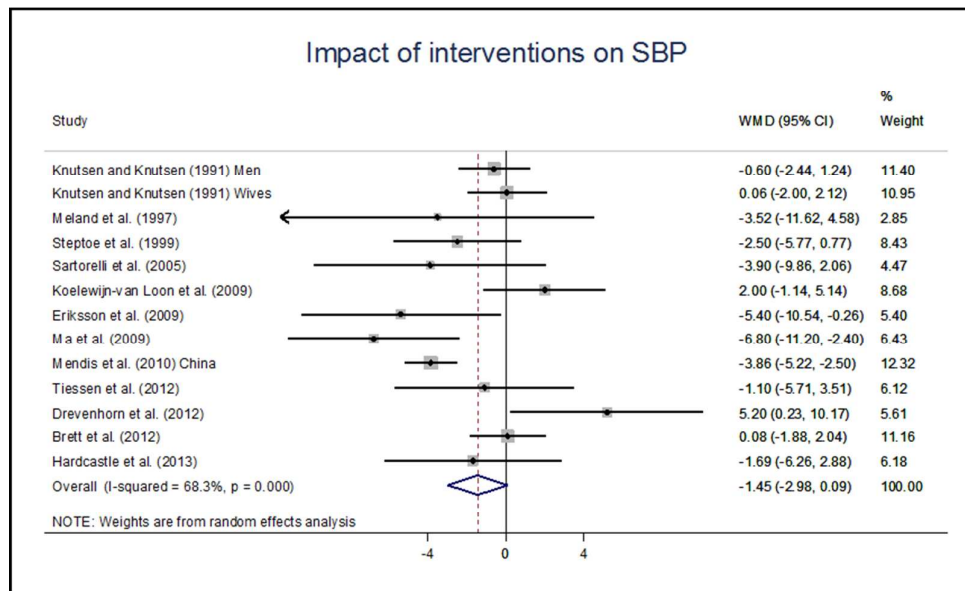

Pooled effect of multiple behaviour interventions on systolic blood pressure (mmHg). Random effects model used. MWD= mean weighted difference. 95% CI = 95% confidence intervals.

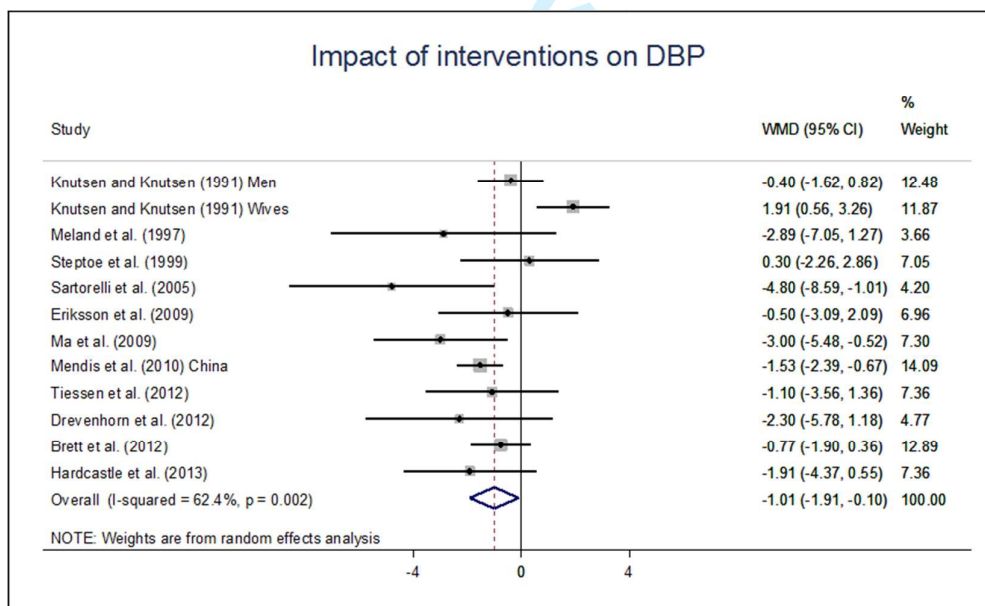

Pooled effect of multiple behaviour interventions on diastolic blood pressure (mmHg). Random effects model used. MWD= mean weighted difference. 95% CI = 95% confidence intervals.



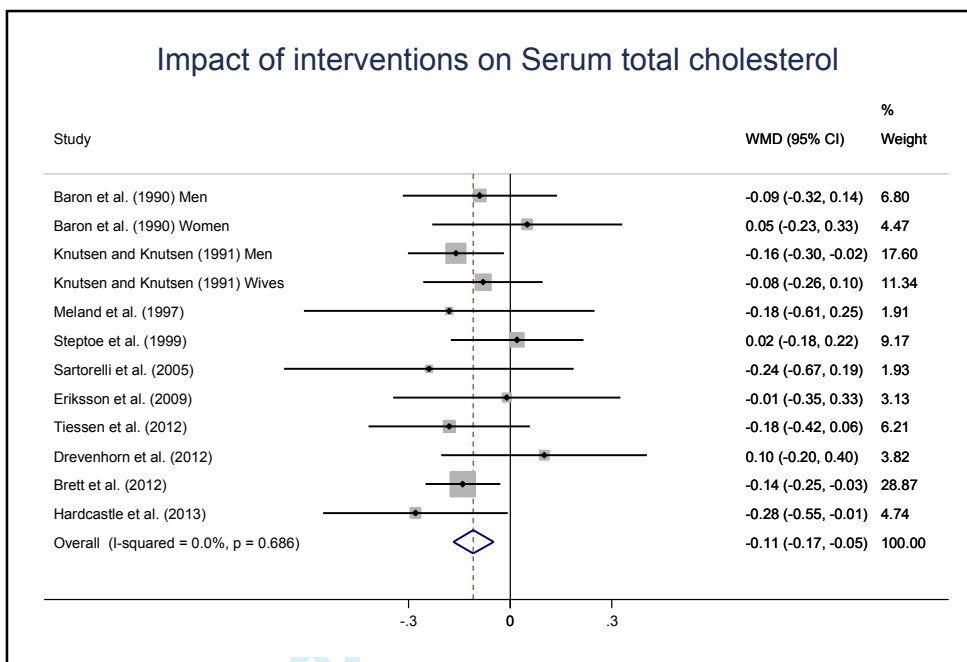

Pooled effect of multiple behaviour interventions on serum total cholesterol (mmol/L). Random effects model used. MWD= mean weighted difference. 95% CI = 95% confidence intervals.

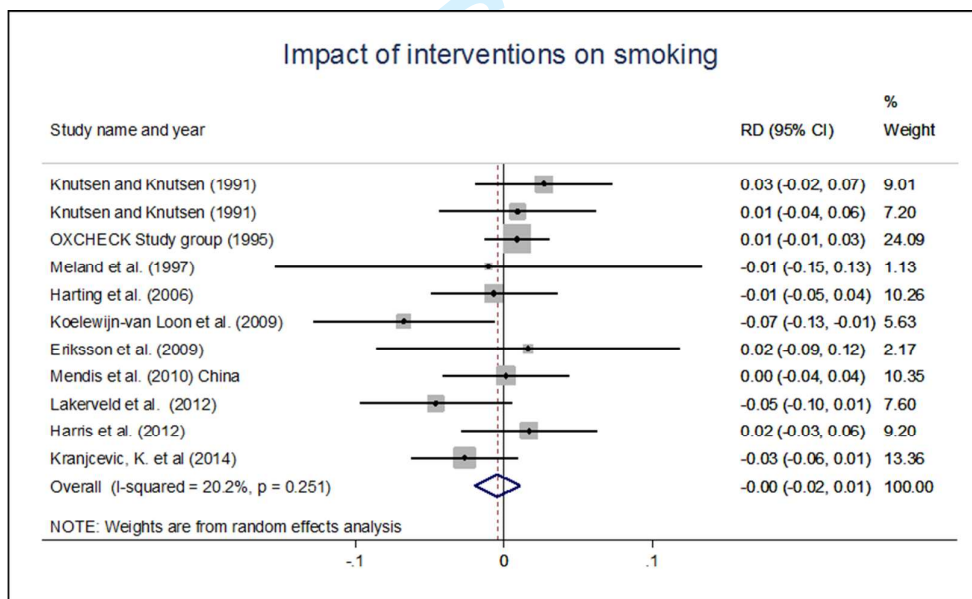

Pooled effect of multiple behaviour interventions on smoking prevalence. Random effects models used. RD= risk difference. 95% CI = 95% confidence intervals.

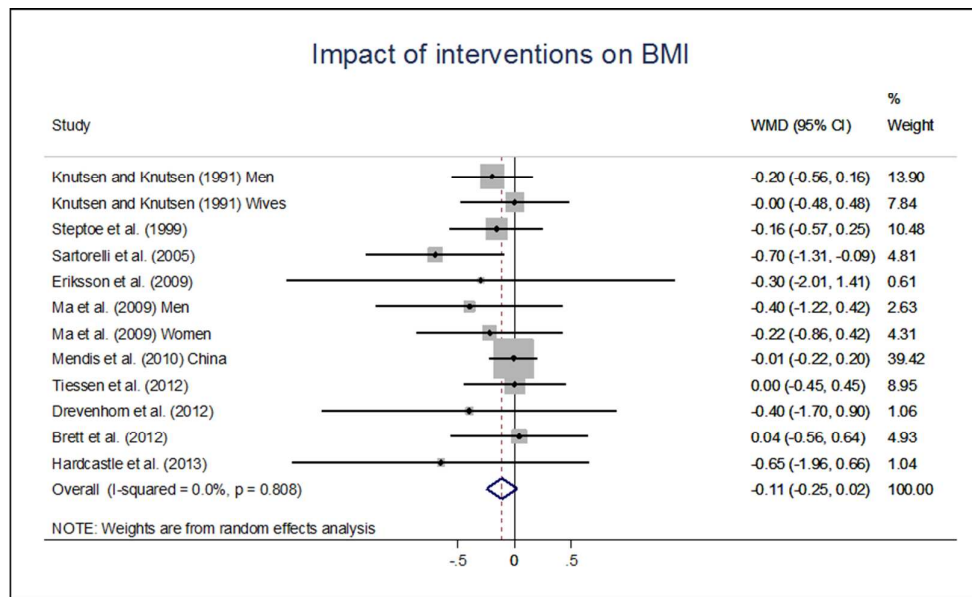

Pooled effect of multiple behaviour interventions on body mass index ( $\text{Kg}/\text{m}^2$ ). Random effects model used. MWD= mean weighted difference. 95% CI = 95% confidence intervals.

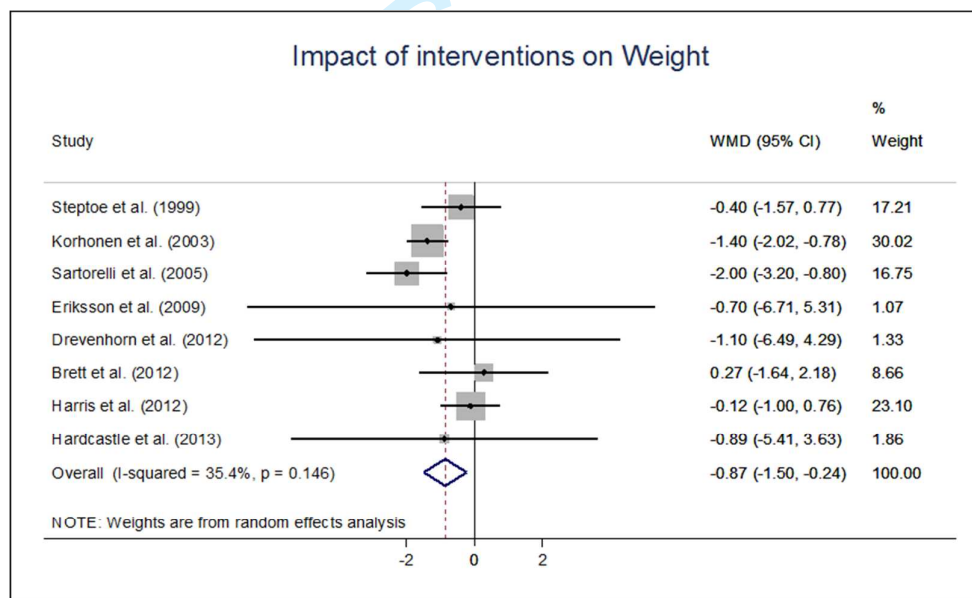

Pooled effect of multiple behaviour interventions on weight (Kg). Random effects model used. MWD= mean weighted difference. 95% CI = 95% confidence intervals.

1  
2  
3  
4  
5  
6  
7  
8  
9  
10  
11  
12  
13  
14  
15  
16  
17  
18  
19  
20  
21  
22  
23  
24  
25  
26  
27  
28  
29  
30  
31  
32  
33  
34  
35  
36  
37  
38  
39  
40  
41  
42  
43  
44  
45  
46  
47  
48  
49  
50  
51  
52  
53  
54  
55  
56  
57  
58  
59  
60

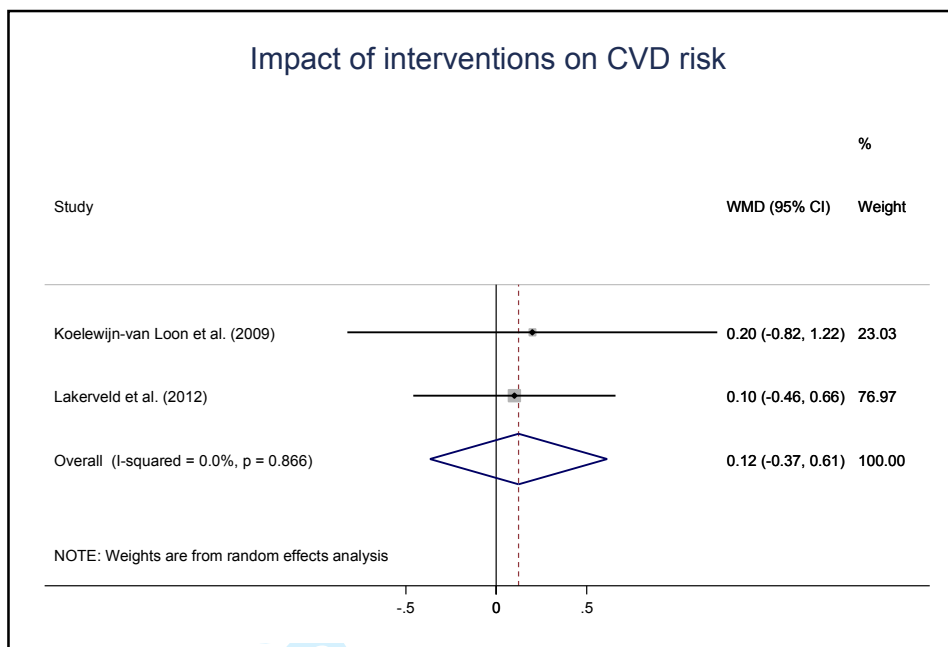

Pooled effect of multiple behaviour interventions on cardiovascular risk (SCORE). Random effect models used. MWD= mean weighted difference. 95% CI = 95% confidence intervals.

Supplementary table 1: Trial characteristics of included studies.

| Study (Year)                             | Country          | Number of Participants | Selection criteria                                                                                                                                                                                                                  | Targeted behaviours                       | Follow-up duration | Intervention reported outcomes                                    |
|------------------------------------------|------------------|------------------------|-------------------------------------------------------------------------------------------------------------------------------------------------------------------------------------------------------------------------------------|-------------------------------------------|--------------------|-------------------------------------------------------------------|
| Kranjčević, et al. <sup>1</sup>          | Croatia          | 1957                   | Men and women, aged ≥40.                                                                                                                                                                                                            | Diet and PA.                              | 18 months          | CVD-risk, weight, BP, cholesterol, smoking, alcohol and PA.       |
| Vetter, et al. <sup>2</sup>              | United States    | 390                    | Men and women, aged ≥21 years, BMI= 30-50kg/m <sup>2</sup> , elevated waist circumference.                                                                                                                                          | Diet and PA.                              | 2 years            | Weight, BP and cholesterol.                                       |
| Lakerveld, et al. <sup>3</sup>           | Netherlands      | 622                    | Men and women, aged: 30-50 years.                                                                                                                                                                                                   | Diet, PA and smoking.                     | 12 months          | CVD-risk, smoking, diet and PA.                                   |
| Hardcastle, et al. <sup>4</sup>          | United Kingdom   | 334                    | Men and women, aged 18-65 years and have at least one CVD risk factor.                                                                                                                                                              | Diet and PA.                              | 18 months          | Weight, BP, cholesterol, diet and PA.                             |
| Tiessen, et al. <sup>5</sup>             | Netherlands      | 201                    | Men aged: 50-75 years old and women aged: 55-75 years and CVD-risk (SCORE) ≥ 5%.                                                                                                                                                    | PA, diet and smoking.                     | 12 months          | CVD-risk, weight, BP, cholesterol, smoking and PA.                |
| Parra-Medina, et al. <sup>6</sup>        | United States    | 266                    | African-American women, aged ≥35 years, baseline BP <160/95.                                                                                                                                                                        | PA and diet.                              | 12 months          | Diet and PA.                                                      |
| Drevenhorn, et al. <sup>7</sup>          | Sweden           | 153                    | Hypertensive patients, men and women aged <75 years, elevated BP, BMI ≥ 25, serum cholesterol ≥ 6.5 and/or serum triglycerides ≥ 2.3 and not reporting regular PA.                                                                  | Smoking, alcohol, weight, PA and stress   | 2 years            | Weight, BP, cholesterol, alcohol and PA.                          |
| Brett, et al. <sup>8</sup>               | Australia        | 1200                   | Men and women aged 40-80 years, without a history of CVD.                                                                                                                                                                           | Diet, PA and smoking.                     | 12 months          | CVD-risk, weight, BP and cholesterol.                             |
| Harris, et al. <sup>9</sup>              | Australia        | 814                    | Men and women, aged 40-55 years with recorded diagnosis of hypertension and/or hyperlipidaemia or aged 56-64 years.                                                                                                                 | Diet, PA, smoking and alcohol.            | 12 months          | CVD-risk, weight, BP, cholesterol, smoking, alcohol, diet and PA. |
| Mendis, et al. <sup>10</sup>             | China<br>Nigeria | 1209<br>1188           | Men and women aged 30-70 years with SBP in the range (140-179 mmHg).                                                                                                                                                                | Smoking cessation, PA and diet.           | 12 months          | Weight, BP, smoking and diet.                                     |
| Koelewijn-van Loon, et al. <sup>11</sup> | Netherlands      | 615                    | One or more of the following: BP ≥ 140 or on treatment for high BP; total cholesterol ≥ 6.5 or on treatment for high cholesterol; smoker aged ≥ 50 years (men) or ≥ 55 years (women); diabetes; a family history of CVD; and obese. | Smoking status, diet, PA and alcohol use. | 12 months          | CVD-risk, BP, cholesterol, smoking, diet and PA.                  |
| Eriksson, et al. <sup>12</sup>           | Sweden           | 151                    | Men and women aged 18-65 years with hypertension, dyslipidaemia, type 2 diabetes or obesity.                                                                                                                                        | Diet and PA.                              | 3 years            | Weight, BP, cholesterol, smoking and PA.                          |
| Phelan, et al. <sup>13</sup>             | United States    | 224                    | Men and women aged 18-65 years and BMI of 30-45 kg/m <sup>2</sup> .                                                                                                                                                                 | Diet and PA.                              | 12 months          | Weight, BP, cholesterol and diet.                                 |

|    |                                          |                |                      |                                                                                                                           |                                                                          |           |                                                                   |
|----|------------------------------------------|----------------|----------------------|---------------------------------------------------------------------------------------------------------------------------|--------------------------------------------------------------------------|-----------|-------------------------------------------------------------------|
| 1  |                                          |                |                      |                                                                                                                           |                                                                          |           |                                                                   |
| 2  |                                          |                |                      |                                                                                                                           |                                                                          |           |                                                                   |
| 3  |                                          |                |                      |                                                                                                                           |                                                                          |           |                                                                   |
| 4  |                                          |                |                      |                                                                                                                           |                                                                          |           |                                                                   |
| 5  | <b>Harting, et al.</b> <sup>14</sup>     | Netherlands    | 1300                 | Men and women who have a greater than 20% risk (Framingham) of incurring a CVD event within 10 years.                     | Diet, PA and smoking.                                                    | 18 months | Smoking, diet and PA.                                             |
| 6  |                                          |                |                      |                                                                                                                           |                                                                          |           |                                                                   |
| 7  |                                          |                |                      |                                                                                                                           |                                                                          |           |                                                                   |
| 8  | <b>Korhonen, et al.</b> <sup>15</sup>    | Finland        | 715                  | Men and women aged 25–74 years, with systolic BP 140–179 and/or diastolic BP 90–109 and/or on treatment for hypertension. | Diet and alcohol (also PA and smoking).                                  | 24 months | Weight, BP, cholesterol, alcohol, diet and PA.                    |
| 9  |                                          |                |                      |                                                                                                                           |                                                                          |           |                                                                   |
| 10 |                                          |                |                      |                                                                                                                           |                                                                          |           |                                                                   |
| 11 | <b>Baron, et al.</b> <sup>16</sup>       | United Kingdom | 368                  | Men and women aged 25 – 60 years.                                                                                         | Diet mainly, but changes in PA, alcohol and smoking were also mentioned. | 12 months | Cholesterol and diet.                                             |
| 12 |                                          |                |                      |                                                                                                                           |                                                                          |           |                                                                   |
| 13 |                                          |                |                      |                                                                                                                           |                                                                          |           |                                                                   |
| 14 |                                          |                |                      |                                                                                                                           |                                                                          |           |                                                                   |
| 15 | <b>Knutsen and Knutsen</b> <sup>17</sup> | Norway         | 1373 men, 1143 wives | Men aged 20 – 54 years and women aged 20-49 years, with no known CHD at baseline.                                         | Diet changes, PA and smoking cessation.                                  | 6 years   | CVD-risk, weight, BP, cholesterol, smoking and PA.                |
| 16 |                                          |                |                      |                                                                                                                           |                                                                          |           |                                                                   |
| 17 |                                          |                |                      |                                                                                                                           |                                                                          |           |                                                                   |
| 18 | <b>Nilsson, et al.</b> <sup>18</sup>     | Sweden         | 86                   | Men and women, born during the period 1925 – 1952, treated hypertensives.                                                 | Diet, smoking, PA and alcohol.                                           | 12 months | Weight, BP, cholesterol, smoking and diet.                        |
| 19 |                                          |                |                      |                                                                                                                           |                                                                          |           |                                                                   |
| 20 | <b>Wood, et al.</b> <sup>19</sup>        | United Kingdom | 7460 men, 5012 women | Men aged 40-59 and their families.                                                                                        | Smoking, weight, diet, alcohol, and PA.                                  | 12 months | CVD-risk, weight, BP, cholesterol and smoking.                    |
| 21 |                                          |                |                      |                                                                                                                           |                                                                          |           |                                                                   |
| 22 |                                          |                |                      |                                                                                                                           |                                                                          |           |                                                                   |
| 23 | <b>OXCHECK Study Group</b> <sup>20</sup> | United Kingdom | 5559                 | Men and women aged 35-64.                                                                                                 | Diet, smoking and PA.                                                    | 3 years   | CVD-risk, weight, BP, cholesterol, alcohol, diet, PA and smoking. |
| 24 |                                          |                |                      |                                                                                                                           |                                                                          |           |                                                                   |
| 25 |                                          |                |                      |                                                                                                                           |                                                                          |           |                                                                   |
| 26 | <b>Lindholm, et al.</b> <sup>21</sup>    | Sweden         | 681                  | Men and women aged 30-59 years, had a moderate hyperlipidaemia, and at least two CVD risk factors.                        | Diet, smoking and PA.                                                    | 18 months | CVD-risk, weight, BP, cholesterol, PA and smoking.                |
| 27 |                                          |                |                      |                                                                                                                           |                                                                          |           |                                                                   |
| 28 | <b>Meland, et al.</b> <sup>22</sup>      | Norway         | 127                  | Men aged 30 to 59 years.                                                                                                  | Diet, smoking and PA.                                                    | 12 months | CVD-risk, BP, cholesterol, PA and smoking.                        |
| 29 |                                          |                |                      |                                                                                                                           |                                                                          |           |                                                                   |
| 30 | <b>Avram, et al.</b> <sup>23</sup>       | Romania        | 253                  | Men and women under 80 years, without history of CVD but defined as high risk individuals.                                | Diet and PA.                                                             | 18 months | Weight, alcohol, diet and PA.                                     |
| 31 |                                          |                |                      |                                                                                                                           |                                                                          |           |                                                                   |
| 32 | <b>Stephoe, et al.</b> <sup>24</sup>     | United Kingdom | 883                  | Men and women aged 18 – 69, total cholesterol of 6.5-9; smoker, BMI of 25-35 and lack of regular PA.                      | Smoking, diet and PA.                                                    | 12 months | Weight, BP, cholesterol, diet and PA.                             |
| 33 |                                          |                |                      |                                                                                                                           |                                                                          |           |                                                                   |
| 34 | <b>Sartorelli, et al.</b> <sup>25</sup>  | Brazil         | 104                  | Men and women aged 30-65 years, body mass index of 24-35 kg/m <sup>2</sup> , and non-diabetic.                            | Diet and PA.                                                             | 12 months | Weight, BP, cholesterol, diet and PA.                             |
| 35 |                                          |                |                      |                                                                                                                           |                                                                          |           |                                                                   |
| 36 | <b>Ma, et al.</b> <sup>26</sup>          | United States  | 419                  | Men and women aged 35 to 85 years, had moderately to severely elevated levels of major modifiable CVD risk factors.       | PA, diet and stress reduction.                                           | 15 months | CVD-risk, weight, BP and cholesterol.                             |
| 37 |                                          |                |                      |                                                                                                                           |                                                                          |           |                                                                   |
| 38 | <b>Tibblin and Åberg</b> <sup>27</sup>   | Sweden         | 400                  | Men and women aged 30 - 69 years, on hypertensive drugs                                                                   | Diet, PA and stress management.                                          | 12 months | Weight, BP and cholesterol.                                       |
| 39 |                                          |                |                      |                                                                                                                           |                                                                          |           |                                                                   |
| 40 |                                          |                |                      |                                                                                                                           |                                                                          |           |                                                                   |

Note: BMI: body mass index, PA: physical activity, BP: blood pressure, CVD: cardiovascular disease

## References:

1. Kranjčević K, Marković BB, Lalić DI, et al. Is a targeted and planned GP intervention effective in cardiovascular disease prevention? A randomized controlled trial. *Medical science monitor: international medical journal of experimental and clinical research* 2014;**20**:1180.
2. Vetter ML, Wadden TA, Chittams J, et al. Effect of lifestyle intervention on cardiometabolic risk factors: results of the POWER-UP trial. *International Journal of Obesity* 2013;**37**:S19-S24.
3. Lakerveld J, Bot SD, Chinapaw MJ, et al. Motivational interviewing and problem solving treatment to reduce type 2 diabetes and cardiovascular disease risk in real life: a randomized controlled trial. *Int J Behav Nutr Phys Act* 2013;**10**(47):10.1186.
4. Hardcastle SJ, Taylor AH, Bailey MP, et al. Effectiveness of a motivational interviewing intervention on weight loss, physical activity and cardiovascular disease risk factors: a randomised controlled trial with a 12-month post-intervention follow-up. *Int J Behav Nutr Phys Act* 2013;**10**(40):1-16.
5. Tiessen AH, Smit AJ, Broer J, et al. Randomized controlled trial on cardiovascular risk management by practice nurses supported by self-monitoring in primary care. *BMC family practice* 2012;**13**(1):1.
6. Parra-Medina D, Wilcox S, Salinas J, et al. Results of the Heart Healthy and Ethnically Relevant Lifestyle trial: a cardiovascular risk reduction intervention for African American women attending community health centers. *American journal of public health* 2011;**101**(10):1914-21.
7. Drevenhorn E, Bengtson A, Nilsson PM, et al. Consultation training of nurses for cardiovascular prevention—a randomized study of 2 years duration. *Blood pressure* 2012;**21**(5):293-99.
8. Brett T, Arnold-Reed D, Phan C, et al. The Fremantle Primary Prevention Study: a multicentre randomised trial of absolute cardiovascular risk reduction. *Br J Gen Pract* 2012;**62**(594):e22-e28.
9. Harris MF, Fanaian M, Jayasinghe UW, et al. A cluster randomised controlled trial of vascular risk factor management in general practice. *Med J Aust* 2012;**197**(7):387-93.
10. Mendis S, Johnston SC, Fan W, et al. Cardiovascular risk management and its impact on hypertension control in primary care in low-resource settings: a cluster-randomized trial. *Bulletin of the World Health Organization* 2010;**88**(6):412-19.

11. Koelewijn-van Loon MS, van der Weijden T, van Steenkiste B, et al. Involving patients in cardiovascular risk management with nurse-led clinics: a cluster randomized controlled trial. *Canadian Medical Association Journal* 2009;**181**(12):E267-E74.
12. Eriksson MK, Franks PW, Eliasson M. A 3-year randomized trial of lifestyle intervention for cardiovascular risk reduction in the primary care setting: the Swedish Björknäs study. *PloS one* 2009;**4**(4):e5195.
13. Phelan S, Wadden T, Berkowitz R, et al. Impact of weight loss on the metabolic syndrome. *International journal of obesity* 2007;**31**(9):1442-48.
14. Harting J, van Assema P, van Limpt P, et al. Cardiovascular prevention in the Hartslag Limburg project: effects of a high-risk approach on behavioral risk factors in a general practice population. *Preventive medicine* 2006;**43**(5):372-78.
15. Korhonen M, Kastarinen M, Uusitupa M, et al. The effect of intensified diet counseling on the diet of hypertensive subjects in primary health care: a 2-year open randomized controlled trial of lifestyle intervention against hypertension in eastern Finland. *Preventive medicine* 2003;**36**(1):8-16.
16. Baron JA, Gleason R, Crowe B, et al. Preliminary trial of the effect of general practice based nutritional advice. *Br J Gen Pract* 1990;**40**(333):137-41.
17. Knutsen SF, Knutsen R. The Tromsø Survey: the Family Intervention study—the effect of intervention on some coronary risk factors and dietary habits, a 6-year follow-up. *Preventive medicine* 1991;**20**(2):197-212.
18. Nilsson PM, Lindholm LH, Scherstén BF. Life style changes improve insulin resistance in hyperinsulinaemic subjects: a one-year intervention study of hypertensives and normotensives in Dalby. *Journal of hypertension* 1992;**10**(9):1071-78.
19. Wood D, Kinmonth A, Davies G, et al. Randomised controlled trial evaluating cardiovascular screening and intervention in general practice: principal results of British family heart study. *Bmj* 1994;**308**(6924):313-20.
20. OXCHECK. Effectiveness of health checks conducted by nurses in primary care: final results of the OXCHECK study. *BMJ: British Medical Journal* 1995:1099-104.
21. Lindholm LH, Ekblom T, Dash C, et al. The impact of health care advice given in primary care on cardiovascular risk. *BMJ* 1995;**310**(6987):1105-09.

- 1  
2  
3  
4  
5 22. Meland E, Lærum E, Ulvik RJ. Effectiveness of two preventive interventions for coronary heart disease in primary care. *Scandinavian*  
6 *journal of primary health care* 1997;**15**(1):57-63.  
7  
8 23. Avram C, Iurciuc M, Craciun L, et al. Dietary and physical activity counseling in high-risk asymptomatic patients with metabolic syndrome—A  
9 primary care intervention. *Journal of Food, Agriculture & Environment* 2011;**9**(3&4):16-19.  
10  
11 24. Steptoe A, Day S, Doherty S, et al. Behavioural counselling in general practice for the promotion of healthy behaviour among adults at  
12 increased risk of coronary heart disease: randomised trial  
13 Commentary: Treatment allocation by the method of minimisation. *Bmj*  
14 1999;**319**(7215):943-48.  
15  
16 25. Sartorelli DS, Sciarra EC, Franco LJ, et al. Beneficial effects of short-term nutritional counselling at the primary health-care level among  
17 Brazilian adults. *Public health nutrition* 2005;**8**(07):820-25.  
18  
19 26. Ma J, Berra K, Haskell WL, et al. Case management to reduce risk of cardiovascular disease in a county health care system. *Archives of*  
20 *internal medicine* 2009;**169**(21):1988-95.  
21  
22 27. Tibblin G, Åberg H. NON-PHARMACOLOGICAL TREATMENT OF HYPERTENSION IN TWO STEPS-1 YEAR REPORT FROM EIGHT  
23 HEALTH CENTRES. *Acta Medica Scandinavica* 1986;**220**(S714):105-12.  
24  
25  
26  
27  
28  
29  
30  
31  
32  
33  
34  
35  
36  
37  
38  
39  
40  
41  
42  
43  
44  
45  
46  
47  
48  
49



**Supplementary table 2:** Intervention components and behaviour change techniques employed.

| Study (Year)                             | Study groups   | Who delivered it                     | BCTs <sup>1</sup>                                | Mode of delivery                                           | No. of sessions | Duration of sessions (in mins)                                     |
|------------------------------------------|----------------|--------------------------------------|--------------------------------------------------|------------------------------------------------------------|-----------------|--------------------------------------------------------------------|
| Kranjčević, et al. <sup>1</sup>          | Intervention   | GPs                                  | 1.3, 2.1, 9.1                                    | Face to face and written materials                         | 5               | Unclear                                                            |
|                                          | Control        |                                      | Unclear                                          | Unclear                                                    | Unclear         | Unclear                                                            |
| Vetter, et al. <sup>2</sup>              | Intervention 1 | PCP and lifestyle coach.             | 1.1, 1.5, 2.3, 8.7, 9.1                          | Face to face and written materials                         | 32              | Visits: 5-7, counselling: 10-15.                                   |
|                                          | Intervention 2 |                                      | 1.1, 1.5, 2.3, 8.7, 9.1, 11.1                    | Face to face and written materials                         | 32              | Visits: 5-7, counselling: 10-15.                                   |
|                                          | Control        |                                      | 1.7                                              | Face to face                                               | 8               | Visits: 5-7.                                                       |
| Lakerveld, et al. <sup>3</sup>           | Intervention   |                                      | 1.2, 1.6                                         | Face to face and phone sessions.                           | 9               | Face to face sessions: 30.                                         |
|                                          | Control        | Nurse                                | 4.1, 5.1                                         | Written materials.                                         | Unclear         | Unclear                                                            |
| Hardcastle, et al. <sup>4</sup>          | Intervention   | PA specialist and dietician          | 1.1, 1.5, 9.2                                    | Face to face.                                              | 5               | 20-30.                                                             |
|                                          | Control        |                                      | 5.1                                              | Written materials.                                         | Unclear         | Unclear                                                            |
| Tiessen, et al. <sup>5</sup>             | Intervention   | Practice nurses.                     | 2.2, 2.3, 2.4, 5.1                               | Face to face.                                              | 7               | First session: 20 min, other sessions based on patient preference. |
|                                          | Control        |                                      | 5.1                                              | Face to face and written materials.                        | One             | Unclear.                                                           |
| Parra-Medina, et al. <sup>6</sup>        | Intervention   | PCP, health educators and nurses     | 1.1, 1.2.                                        | Face to face and telephone sessions and written materials. | Up to 15        | First session: 60. Following sessions: 20.                         |
|                                          | Control        |                                      | 1.1                                              | Face to face and written materials.                        | One             | 5-10 mins.                                                         |
| Drevenhorn, et al. <sup>7</sup>          | Intervention   | Nurses                               | 1.1, 1.5, 5.3, 9.2, 10.4, 11.2                   | Face to face                                               | Unclear         | Unclear                                                            |
|                                          | Control        |                                      | Unclear                                          | Unclear                                                    | Unclear         | Unclear                                                            |
| Brett, et al. <sup>8</sup>               | Intervention   |                                      | 1.1, 1.3, 2.7                                    | Face to face                                               | 5               | Unclear                                                            |
|                                          | Control        | GPs                                  | 1.1, 1.3, 2.7                                    | Face to face                                               | 2               | Unclear                                                            |
| Harris, et al. <sup>9</sup>              | Intervention   | Health practitioner, dietitian or PT | 1.1, 1.2, 2.3, 4.1, 6.1, 9.1                     | Face to face                                               | 6               | 90 mins/ session.                                                  |
|                                          | Control        |                                      | Unclear                                          | Unclear                                                    | Unclear         | Unclear                                                            |
| Mendis, et al. <sup>10</sup>             | Intervention   | Health-care workers                  | 2.6, 4.1                                         | Face to face and written materials                         | 4               | Unclear                                                            |
|                                          | Control        |                                      | Unclear                                          | Unclear                                                    | Unclear         | Unclear                                                            |
| Koelewijn-van Loon, et al. <sup>11</sup> | Intervention   | Nurses                               | 1.1, 1.2, 1.4, 1.5, 5.1, 9.2                     | Face to face and telephone sessions                        | 3               | Face to face: 10-20, telephone: 10.                                |
|                                          | Control        |                                      | 5.1                                              | Face to face                                               | One             | Unclear                                                            |
| Eriksson, et al. <sup>12</sup>           | Intervention   | Dietician, PT and assistants.        | 1.1, 1.2, 1.3, 1.4, 4.1, 5.1, 8.1, 8.7, 9.1, 9.2 | Face to face                                               | 56              | Unclear.                                                           |
|                                          | Control        |                                      | 9.1                                              | Face to face and written materials.                        | One             | Unclear                                                            |

|    |                                          |                |                                   |                                    |                                                         |         |                                                      |
|----|------------------------------------------|----------------|-----------------------------------|------------------------------------|---------------------------------------------------------|---------|------------------------------------------------------|
| 5  | <b>Phelan, et al.</b> <sup>13</sup>      | Intervention 1 | PCP                               | 2.3, 11.1.                         | Face to face and written materials.                     | 8       | 5-10.                                                |
| 7  |                                          | Intervention 2 | Psychologist                      | 1.5, 2.3, 9.1                      | Group sessions.                                         | 29      | 90                                                   |
| 9  |                                          | Intervention 3 | Psychologist, PCP                 | 1.5, 2.3, 9.1, 11.1                | Face to face, group sessions and written material.      | 37      | Face to face: 5-10, group sessions: 90.              |
| 11 |                                          | Intervention 4 | PCP                               | 1.5, 2.3, 9.1, 11.1                | Face to face and written materials.                     | 8       | 5-10.                                                |
| 13 | <b>Harting, et al.</b> <sup>14</sup>     | Intervention   | Practice assistant and dietician. | 1.1, 1.4, 9.1, 11.1                | Face to face, telephone sessions and written materials. | Unclear | Unclear                                              |
| 14 |                                          | Control        |                                   | Unclear                            | Unclear                                                 | Unclear | Unclear                                              |
| 16 | <b>Korhonen, et al.</b> <sup>15</sup>    | Intervention   | Healthcare centre personnel.      | 1.1, 1.3, 1.4, 2.3, 2.5, 4.1, 9.1  | Face to face.                                           | 7       | Unclear                                              |
| 17 |                                          | Control        |                                   | Unclear                            | Unclear                                                 | Unclear | Unclear                                              |
| 18 | <b>Baron, et al.</b> <sup>16</sup>       | Intervention   | Nurse                             | 5.1, 9.1                           | Face to face, group sessions and written material.      | Unclear | 30.                                                  |
| 20 |                                          | Control        |                                   | Unclear                            | Unclear                                                 | Unclear | Unclear                                              |
| 21 | <b>Knutsen and Knutsen</b> <sup>17</sup> | Intervention   | Physicians and dieticians         | 1.1, 4.1, 5.1, 6.1, 9.1            | Face to face and telephone sessions.                    | 8       | Unclear                                              |
| 22 |                                          | Control        |                                   | Unclear                            | Unclear                                                 | Unclear | Unclear                                              |
| 23 | <b>Nilsson, et al.</b> <sup>18</sup>     | Intervention   | Nurse, dietician or PT.           | 1.1, 2.2, 3.1, 4.1, 6.1, 9.1, 12.5 | Face to face, group sessions and videotapes.            | Unclear | Unclear                                              |
| 25 |                                          | Control        |                                   | 2.2, 5.1                           | Face to face                                            | One     | Unclear                                              |
| 26 | <b>Wood, et al.</b> <sup>19</sup>        | Intervention   | Nurses                            | 1.1, 2.7, 5.1, 6.2, 9.1            | Face to face and written materials                      | Unclear | First session: 90.                                   |
| 27 |                                          | Control        |                                   | 9.1                                | Face to face                                            | One     | 45 mins                                              |
| 28 | <b>OXCHECK Study Group</b> <sup>20</sup> | Intervention   | Nurses                            | 1.3, 2.7, 9.1,                     | Face to face                                            | Unclear | Initial session: 45-60, following sessions: 10-20.   |
| 30 |                                          | Control        |                                   | Unclear                            | None                                                    | None    | None                                                 |
| 31 | <b>Lindholm, et al.</b> <sup>21</sup>    | Intervention   | Doctors and nurses                | 2.3, 4.1, 5.1, 6.2, 9.1            | Face to face, group sessions and written materials      | 11      | Five group sessions: 90, one group session: all day. |
| 33 |                                          | Control        |                                   | 9.1                                | Face to face and written materials                      | 5       | Unclear                                              |
| 34 | <b>Meland, et al.</b> <sup>22</sup>      | Intervention   | GPs                               | 1.8, 2.3, 8.7, 9.1, 11.2           | Face to face and written materials                      | 4       | Unclear                                              |
| 35 |                                          | Control        |                                   | 9.1                                | Face to face and written materials                      | 4       | Unclear                                              |
| 36 | <b>Avram, et al.</b> <sup>23</sup>       | Intervention   | GPs                               | 1.1, 9.1                           | Face to face and telephone sessions                     | 21      | Face to face sessions: 30.                           |
| 37 |                                          | Control        |                                   | Unclear                            | Written materials                                       | None    | None                                                 |
| 38 | <b>Step toe, et al.</b> <sup>24</sup>    | Intervention   | Nurses                            | 1.1, 1.4, 9.1, 11.1                | Face to face and telephone sessions                     | 2-3     | Face to face sessions: 20.                           |
| 39 |                                          | Control        |                                   | Unclear                            | Unclear                                                 | Unclear | Unclear                                              |
| 40 | <b>Sartorelli, et al.</b>                | Intervention   | Nutritionist                      | 1.1, 1.4, 9.1                      | Face to face and group sessions and                     | 4       | Unclear                                              |

|    |                                        |              |                       |                                |                                                             |         |         |
|----|----------------------------------------|--------------|-----------------------|--------------------------------|-------------------------------------------------------------|---------|---------|
| 5  | <sup>25</sup>                          |              |                       |                                | written materials.                                          |         |         |
| 6  |                                        | Control      |                       | Unclear                        | Group session and written materials                         | 1       | Unclear |
| 7  | <b>Ma, et al.</b> <sup>26</sup>        | Intervention | Nurses and dietitians | 1.1, 1.2, 1.7, 9.1, 11.1, 11.2 | Face to face                                                | 8-10    | 30-60   |
| 9  |                                        | Control      |                       | Unclear                        | Unclear                                                     | Unclear | Unclear |
| 10 | <b>Tibblin and Aberg</b> <sup>27</sup> | Intervention | Nurses and physicians | 2.5, 6.1, 9.1                  | Face to face, group sessions and videotapes and audiotapes. | 15      | Unclear |
| 12 |                                        | Control      |                       | 2.5, 9.1                       | Face to face                                                | 15      | Unclear |

<sup>1</sup> as coded in Michie, Richardson et al.<sup>28</sup> taxonomy of behaviour change technique

Note: 1.1 Goal setting (behaviour); 1.2 Problem solving; 1.3 Goal setting (outcome); 1.4 Action planning; 1.5 Review behaviour goals(s); 1.6 Discrepancy between current behaviour and goal; 2.1 Monitoring of behaviour by others without feedback; 2.2 Feedback on behaviour; 2.3 self-monitoring of behaviour; 2.4 Self-monitoring of outcome(s) of behaviour; 2.5 Monitoring of outcomes of behaviour without feedback; 2.6 Biofeedback; 2.7 Feedback on outcome(s) of behaviour; 3.1 Social support (unspecified); 4.1 Instructions on how to perform a behaviour; 5.1 Information about health consequences; 5.3 Information about social and environmental consequences; 6.1 Demonstration of the behaviour; 6.2 Social comparison; 8.1 Behavioural practice/rehearsal; 8.7 Graded tasks; 9.1 Credible source; 9.2 Pros and cons; 10.4 Social reward; 11.1 Pharmacological support; 11.2 Reduce negative emotions; 12.5 Adding objects to the environment; PT Physiotherapist, PA Physical activity

## References:

1. Kranjčević K, Marković BB, Lalić DI, et al. Is a targeted and planned GP intervention effective in cardiovascular disease prevention? A randomized controlled trial. *Medical science monitor: international medical journal of experimental and clinical research* 2014;**20**:1180.
2. Vetter ML, Wadden TA, Chittams J, et al. Effect of lifestyle intervention on cardiometabolic risk factors: results of the POWER-UP trial. *International Journal of Obesity* 2013;**37**:S19-S24.
3. Lakerveld J, Bot SD, Chinapaw MJ, et al. Motivational interviewing and problem solving treatment to reduce type 2 diabetes and cardiovascular disease risk in real life: a randomized controlled trial. *Int J Behav Nutr Phys Act* 2013;**10**(47):10.1186.
4. Hardcastle SJ, Taylor AH, Bailey MP, et al. Effectiveness of a motivational interviewing intervention on weight loss, physical activity and cardiovascular disease risk factors: a randomised controlled trial with a 12-month post-intervention follow-up. *Int J Behav Nutr Phys Act* 2013;**10**(40):1-16.
5. Tiessen AH, Smit AJ, Broer J, et al. Randomized controlled trial on cardiovascular risk management by practice nurses supported by self-monitoring in primary care. *BMC family practice* 2012;**13**(1):1.
6. Parra-Medina D, Wilcox S, Salinas J, et al. Results of the Heart Healthy and Ethnically Relevant Lifestyle trial: a cardiovascular risk reduction intervention for African American women attending community health centers. *American journal of public health* 2011;**101**(10):1914-21.
7. Drevenhorn E, Bengtson A, Nilsson PM, et al. Consultation training of nurses for cardiovascular prevention—a randomized study of 2 years duration. *Blood pressure* 2012;**21**(5):293-99.
8. Brett T, Arnold-Reed D, Phan C, et al. The Fremantle Primary Prevention Study: a multicentre randomised trial of absolute cardiovascular risk reduction. *Br J Gen Pract* 2012;**62**(594):e22-e28.
9. Harris MF, Fanaian M, Jayasinghe UW, et al. A cluster randomised controlled trial of vascular risk factor management in general practice. *Med J Aust* 2012;**197**(7):387-93.
10. Mendis S, Johnston SC, Fan W, et al. Cardiovascular risk management and its impact on hypertension control in primary care in low-resource settings: a cluster-randomized trial. *Bulletin of the World Health Organization* 2010;**88**(6):412-19.
11. Koelewijn-van Loon MS, van der Weijden T, van Steenkiste B, et al. Involving patients in cardiovascular risk management with nurse-led clinics: a cluster randomized controlled trial. *Canadian Medical Association Journal* 2009;**181**(12):E267-E74.
12. Eriksson MK, Franks PW, Eliasson M. A 3-year randomized trial of lifestyle intervention for cardiovascular risk reduction in the primary care setting: the Swedish Björknäs study. *PloS one* 2009;**4**(4):e5195.
13. Phelan S, Wadden T, Berkowitz R, et al. Impact of weight loss on the metabolic syndrome. *International journal of obesity* 2007;**31**(9):1442-48.
14. Harting J, van Assema P, van Limpt P, et al. Cardiovascular prevention in the Hartsлаг Limburg project: effects of a high-risk approach on behavioral risk factors in a general practice population. *Preventive medicine* 2006;**43**(5):372-78.
15. Korhonen M, Kastarinen M, Uusitupa M, et al. The effect of intensified diet counseling on the diet of hypertensive subjects in primary health care: a 2-year open randomized controlled trial of lifestyle intervention against hypertension in eastern Finland. *Preventive medicine* 2003;**36**(1):8-16.
16. Baron JA, Gleason R, Crowe B, et al. Preliminary trial of the effect of general practice based nutritional advice. *Br J Gen Pract* 1990;**40**(333):137-41.

17. Knutsen SF, Knutsen R. The Tromsø Survey: the Family Intervention study—the effect of intervention on some coronary risk factors and dietary habits, a 6-year follow-up. *Preventive medicine* 1991;**20**(2):197-212.
18. Nilsson PM, Lindholm LH, Scherstén BF. Life style changes improve insulin resistance in hyperinsulinaemic subjects: a one-year intervention study of hypertensives and normotensives in Dalby. *Journal of hypertension* 1992;**10**(9):1071-78.
19. Wood D, Kinmonth A, Davies G, et al. Randomised controlled trial evaluating cardiovascular screening and intervention in general practice: principal results of British family heart study. *Bmj* 1994;**308**(6924):313-20.
20. OXCHECK. Effectiveness of health checks conducted by nurses in primary care: final results of the OXCHECK study. *BMJ: British Medical Journal* 1995:1099-104.
21. Lindholm LH, Ekblom T, Dash C, et al. The impact of health care advice given in primary care on cardiovascular risk. *BMJ* 1995;**310**(6987):1105-09.
22. Meland E, Lærum E, Ulvik RJ. Effectiveness of two preventive interventions for coronary heart disease in primary care. *Scandinavian journal of primary health care* 1997;**15**(1):57-63.
23. Avram C, Iurciuc M, Craciun L, et al. Dietary and physical activity counseling in high-risk asymptomatic patients with metabolic syndrome—A primary care intervention. *Journal of Food, Agriculture & Environment* 2011;**9**(3&4):16-19.
24. Steptoe A, Day S, Doherty S, et al. Behavioural counselling in general practice for the promotion of healthy behaviour among adults at increased risk of coronary heart disease: randomised trialCommentary: Treatment allocation by the method of minimisation. *Bmj* 1999;**319**(7215):943-48.
25. Sartorelli DS, Sciarra EC, Franco LJ, et al. Beneficial effects of short-term nutritional counselling at the primary health-care level among Brazilian adults. *Public health nutrition* 2005;**8**(07):820-25.
26. Ma J, Berra K, Haskell WL, et al. Case management to reduce risk of cardiovascular disease in a county health care system. *Archives of internal medicine* 2009;**169**(21):1988-95.
27. Tibblin G, Åberg H. NON-PHARMACOLOGICAL TREATMENT OF HYPERTENSION IN TWO STEPS-1 YEAR REPORT FROM EIGHT HEALTH CENTRES. *Acta Medica Scandinavica* 1986;**220**(S714):105-12.
28. Michie S, Richardson M, Johnston M, et al. The behavior change technique taxonomy (v1) of 93 hierarchically clustered techniques: building an international consensus for the reporting of behavior change interventions. *Annals of behavioral medicine* 2013;**46**(1):81-95.

**Supplementary table 3:** Risk of bias assessment.

| Study<br>(Year)                     | Risk of bias                                                   |                                        |                                                                    |                                                                     |                                            |                                     |
|-------------------------------------|----------------------------------------------------------------|----------------------------------------|--------------------------------------------------------------------|---------------------------------------------------------------------|--------------------------------------------|-------------------------------------|
|                                     | Sequence generation<br>(randomisation<br>methods) <sup>a</sup> | Allocation<br>concealment <sup>b</sup> | Blinding of participants<br>to study group allocation <sup>c</sup> | Blinding of trial<br>personnel or outcome<br>assessors <sup>d</sup> | Incomplete<br>outcome<br>data <sup>e</sup> | Selective<br>reporting <sup>f</sup> |
| Kranjčević, K. et al (2014)         | Unclear                                                        | Unclear                                | Unclear                                                            | Unclear                                                             | High                                       | Low                                 |
| Vetter et al. (2013)                | Low                                                            | Low                                    | High                                                               | Low                                                                 | High                                       | Low                                 |
| Lakerveld et al. (2012)             | Low                                                            | Low                                    | High                                                               | High                                                                | High                                       | Low                                 |
| Hardcastle et al. (2013)            | Low                                                            | Low                                    | Low                                                                | Low                                                                 | High                                       | Low                                 |
| Tiessen et al. (2012)               | Low                                                            | Low                                    | High                                                               | High                                                                | Unclear                                    | Low                                 |
| Parra-Medina et al. (2011)          | Unclear                                                        | Unclear                                | Low                                                                | Low                                                                 | High                                       | High                                |
| Drevenhorn et al. (2012)            | Unclear                                                        | Unclear                                | Unclear                                                            | Unclear                                                             | High                                       | Low                                 |
| Brett et al. (2012)                 | Low                                                            | High                                   | High                                                               | High                                                                | Low                                        | High                                |
| Harris et al. (2012)                | Low                                                            | Low                                    | High                                                               | Low                                                                 | Low                                        | Low                                 |
| Mendis et al. (2010)                | Unclear                                                        | Unclear                                | High                                                               | High                                                                | Low                                        | Unclear                             |
| Koelewijn-van Loon et al.<br>(2009) | Low                                                            | Low                                    | High                                                               | High                                                                | High                                       | Low                                 |
| Eriksson et al. (2009)              | Low                                                            | Low                                    | High                                                               | High                                                                | Unclear                                    | Low                                 |
| Phelan et al. (2007)                | Unclear                                                        | Unclear                                | Unclear                                                            | Unclear                                                             | Unclear                                    | Unclear                             |
| Harting et al. (2006)               | Unclear                                                        | Unclear                                | Unclear                                                            | Unclear                                                             | Unclear                                    | Unclear                             |
| Korhonen et al. (2003)              | High                                                           | High                                   | High                                                               | Unclear                                                             | High                                       | Low                                 |
| Baron et al. (1990)                 | Unclear                                                        | Unclear                                | Unclear                                                            | Unclear                                                             | Unclear                                    | Unclear                             |
| Knutsen and Knutsen<br>(1991)       | Low                                                            | Low                                    | Unclear                                                            | Low                                                                 | Low                                        | Low                                 |
| Nilsson et al. (1992)               | Unclear                                                        | Unclear                                | Unclear                                                            | Low                                                                 | Low                                        | Low                                 |
| Wood et al. (1994)                  | Unclear                                                        | Unclear                                | Unclear                                                            | Unclear                                                             | Unclear                                    | Low                                 |
| OXCHECK Study group<br>(1995)       | Unclear                                                        | Unclear                                | High                                                               | Low                                                                 | Unclear                                    | Low                                 |
| Lindholm et al. (1995)              | Unclear                                                        | Unclear                                | High                                                               | Unclear                                                             | Low                                        | Low                                 |
| Meland et al. (1997)                | Unclear                                                        | Unclear                                | Unclear                                                            | Unclear                                                             | Unclear                                    | Unclear                             |
| Avram et al. (2011)                 | Unclear                                                        | Unclear                                | Low                                                                | Low                                                                 | Low                                        | Unclear                             |

|                          |     |     |         |         |         |         |
|--------------------------|-----|-----|---------|---------|---------|---------|
| Step toe et al. (1999)   | Low | Low | High    | High    | High    | Low     |
| Sartorelli et al. (2005) | Low | Low | Low     | High    | High    | Unclear |
| Ma et al. (2009)         | Low | Low | Low     | Low     | Unclear | Low     |
| Åberg and Tibblin (1989) | Low | Low | Unclear | Unclear | Low     | Unclear |

<sup>a</sup> Assessment of whether or not methods used to generate the allocation sequence should produce comparable groups.

<sup>b</sup> Assessment of whether or not the method used to conceal allocation sequence is sufficient or not.

<sup>c</sup> Assessment of the methods used to blind study participants and personnel from knowing intervention allocation.

<sup>d</sup> Assessment of the methods used to blind study outcome assessors from knowing intervention allocation, and whether or not this method of blinding is sufficient.

<sup>e</sup> Assessment of whether incomplete outcome data were adequately dealt with. Studies missing outcome data for >20% of participants who underwent randomization were considered at high risk of bias, while studies missing <10% of participants who underwent randomization were considered at low risk of bias.

<sup>f</sup> Assessment of whether all outcome measures described in the introduction and methods section of the paper (and published protocols) were reported.

**Supplementary table 4:** Theory use evaluation using Theory Coding Scheme.

| Study                                                                                                                   | Vetter et al. (2013)                                    | Lakerveld et al. (2012)                                    | Tiessen et al. (2012) | Parra-Medina et al. (2011)                          | Drevenhor n et al. (2012) | Harris et al. (2012)   | Eriksson et al. (2009) | Steptoe et al. (1999)  | Ma et al. (2009)                                    |
|-------------------------------------------------------------------------------------------------------------------------|---------------------------------------------------------|------------------------------------------------------------|-----------------------|-----------------------------------------------------|---------------------------|------------------------|------------------------|------------------------|-----------------------------------------------------|
| Theoretical base                                                                                                        | Social cognitive and behavioural self-management theory | Theory of planned behaviour and theory of self-regulation. | Stages of change      | Trans-theoretical model and social cognitive theory | Stages of changes model   | Stages of change model | Stages of change model | Stages of change model | Social cognitive theory and trans-theoretical model |
| 1) Theory/ model of behaviour mentioned                                                                                 | Yes                                                     | Yes                                                        | Yes                   | Yes                                                 | Yes                       | Yes                    | Yes                    | Yes                    | No                                                  |
| 2) Targeted construct mentioned                                                                                         | Yes                                                     | Yes                                                        | No                    | Yes                                                 | Yes                       | Yes                    | Yes                    | Yes                    | No                                                  |
| 3) Intervention based on single theory                                                                                  | No                                                      | No                                                         | Yes                   | No                                                  | Yes                       | Yes                    | Yes                    | Yes                    | No                                                  |
| 4) theory used to select recipients                                                                                     | No                                                      | No                                                         | Yes                   | No                                                  | No                        | No                     | No                     | No                     | No                                                  |
| 5) Theory used to select intervention techniques                                                                        | Yes                                                     | Yes                                                        | Do not know           | Yes                                                 | Yes                       | No                     | No                     | No                     | No                                                  |
| 6) theory used to tailor intervention techniques to recipients                                                          | No                                                      | No                                                         | Do not know           | Yes                                                 | Yes                       | Yes                    | No                     | No                     | No                                                  |
| 7) <u>All</u> intervention techniques are explicitly linked to theory construct                                         | No                                                      | Yes                                                        | No                    | Yes                                                 | Yes                       | No                     | No                     | No                     | No                                                  |
| 8) <u>at least one</u> of the intervention techniques are explicitly linked to theory construct                         | Yes                                                     | No                                                         | No                    | No                                                  | No                        | No                     | No                     | No                     | No                                                  |
| 9) Group of techniques are linked to a group of constructs                                                              | Yes                                                     | Yes                                                        | No                    | Yes                                                 | Yes                       | No                     | No                     | No                     | No                                                  |
| 10) <u>All</u> theory relevant constructs are explicitly linked to at least one intervention technique.                 | No                                                      | No                                                         | No                    | No                                                  | Yes                       | No                     | No                     | No                     | No                                                  |
| 11) <u>At least one</u> of the theory relevant constructs are explicitly linked to at least one intervention technique. | Yes                                                     | Yes                                                        | No                    | Yes                                                 | No                        | No                     | No                     | No                     | No                                                  |
| 12) theory-relevant constructs are                                                                                      | No                                                      | B                                                          | No                    | No                                                  | No                        | No                     | No                     | Yes                    | No                                                  |



|    |                                                    |               |         |             |             |         |         |     |         |     |
|----|----------------------------------------------------|---------------|---------|-------------|-------------|---------|---------|-----|---------|-----|
| 5  | measured                                           |               |         |             |             |         |         |     |         |     |
| 6  | 13) Quality of measures                            | N/A           | A       | N/A         | No          | N/A     | N/A     | N/A | C and F | N/A |
| 7  | 14) Randomization of participants                  | A, B, C and D | A and B | A,B,C and D | A           | A and C | A and B | No  | N/A     | N/A |
| 8  | condition                                          |               |         |             |             |         |         |     |         |     |
| 9  | 15) Changes in measured theory-relevant constructs | No            | Yes     | Do not know | Do not know | No      | No      | No  | N/A     | N/A |
| 10 | 16) Mediation analysis of constructs               | No            | No      | No          | No          | No      | No      | No  | N/A     | N/A |
| 11 | 17) results discussed in relation to theory        | No            | Yes     | No          | No          | No      | No      | No  | N/A     | No  |
| 12 | 18) Appropriate support for theory                 | No            | No      | Do not know | Do not know | No      | No      | No  | N/A     | No  |
| 13 | 19) Results used to refine theory                  | No            | No      | No          | No          | No      | No      | No  | No      | No  |
| 14 |                                                    |               |         |             |             |         |         |     |         |     |
| 15 |                                                    |               |         |             |             |         |         |     |         |     |
| 16 |                                                    |               |         |             |             |         |         |     |         |     |
| 17 |                                                    |               |         |             |             |         |         |     |         |     |
| 18 |                                                    |               |         |             |             |         |         |     |         |     |
| 19 |                                                    |               |         |             |             |         |         |     |         |     |
| 20 |                                                    |               |         |             |             |         |         |     |         |     |
| 21 |                                                    |               |         |             |             |         |         |     |         |     |
| 22 |                                                    |               |         |             |             |         |         |     |         |     |
| 23 |                                                    |               |         |             |             |         |         |     |         |     |
| 24 |                                                    |               |         |             |             |         |         |     |         |     |
| 25 |                                                    |               |         |             |             |         |         |     |         |     |
| 26 |                                                    |               |         |             |             |         |         |     |         |     |
| 27 |                                                    |               |         |             |             |         |         |     |         |     |
| 28 |                                                    |               |         |             |             |         |         |     |         |     |
| 29 |                                                    |               |         |             |             |         |         |     |         |     |
| 30 |                                                    |               |         |             |             |         |         |     |         |     |
| 31 |                                                    |               |         |             |             |         |         |     |         |     |
| 32 |                                                    |               |         |             |             |         |         |     |         |     |
| 33 |                                                    |               |         |             |             |         |         |     |         |     |
| 34 |                                                    |               |         |             |             |         |         |     |         |     |
| 35 |                                                    |               |         |             |             |         |         |     |         |     |
| 36 |                                                    |               |         |             |             |         |         |     |         |     |
| 37 |                                                    |               |         |             |             |         |         |     |         |     |
| 38 |                                                    |               |         |             |             |         |         |     |         |     |
| 39 |                                                    |               |         |             |             |         |         |     |         |     |
| 40 |                                                    |               |         |             |             |         |         |     |         |     |
| 41 |                                                    |               |         |             |             |         |         |     |         |     |
| 42 |                                                    |               |         |             |             |         |         |     |         |     |
| 43 |                                                    |               |         |             |             |         |         |     |         |     |
| 44 |                                                    |               |         |             |             |         |         |     |         |     |
| 45 |                                                    |               |         |             |             |         |         |     |         |     |
| 46 |                                                    |               |         |             |             |         |         |     |         |     |
| 47 |                                                    |               |         |             |             |         |         |     |         |     |
| 48 |                                                    |               |         |             |             |         |         |     |         |     |
| 49 |                                                    |               |         |             |             |         |         |     |         |     |

# BMJ Open

## Multiple health behaviour change interventions for primary prevention of cardiovascular disease in primary care: systematic review and meta-analysis

|                                 |                                                                                                                                                                                                                                                                                |
|---------------------------------|--------------------------------------------------------------------------------------------------------------------------------------------------------------------------------------------------------------------------------------------------------------------------------|
| Journal:                        | <i>BMJ Open</i>                                                                                                                                                                                                                                                                |
| Manuscript ID                   | bmjopen-2016-015375.R1                                                                                                                                                                                                                                                         |
| Article Type:                   | Research                                                                                                                                                                                                                                                                       |
| Date Submitted by the Author:   | 14-Mar-2017                                                                                                                                                                                                                                                                    |
| Complete List of Authors:       | Alageel, Samah; King's College London, Primary Care and Public Health Gulliford, Martin; King's College London, UK<br>McDermott, Lisa; King's College London, Primary Care and Public Health Sciences<br>Wright, Alison; King's College London, Primary care and public health |
| <b>Primary Subject Heading</b>: | Public health                                                                                                                                                                                                                                                                  |
| Secondary Subject Heading:      | Cardiovascular medicine                                                                                                                                                                                                                                                        |
| Keywords:                       | cardiovascular diseases, health behaviour, PRIMARY CARE, primary prevention, meta-analysis                                                                                                                                                                                     |
|                                 |                                                                                                                                                                                                                                                                                |

SCHOLARONE™  
Manuscripts

1  
2  
3  
4 **Multiple health behaviour change interventions for primary prevention of cardiovascular**  
5 **disease in primary care: systematic review and meta-analysis**  
6  
7  
8  
9

10 **Samah Alageel MPH, Martin C Gulliford FFPH, Lisa McDermott PhD, Alison J. Wright PhD**  
11

12 **Department of Primary Care and Public Health Sciences, King's College London**  
13  
14

15  
16  
17  
18 **Correspondence: Samah Alageel**

19 **Department of Primary Care and Public Health Sciences,**  
20 **Faculty of Life Sciences and Medicine.**

21 **King's College London, Addison House, Guy's Campus,**  
22 **London SE1 1UL, United Kingdom**

23 **Email: [samah.alageel@kcl.ac.uk](mailto:samah.alageel@kcl.ac.uk)**

24 **Tel: 0207 848 6631**

25 **Fax: 0207 848 6620**  
26  
27  
28  
29  
30

31 **Word count:**

|                 |             |
|-----------------|-------------|
| <b>Abstract</b> | <b>260</b>  |
| <b>Text</b>     | <b>4927</b> |
| <b>Tables</b>   | <b>4</b>    |
| <b>Figures</b>  | <b>1</b>    |

32  
33  
34  
35  
36  
37  
38  
39  
40  
41  
42  
43  
44  
45  
46  
47  
48  
49  
50  
51  
52  
53  
54  
55  
56  
57  
58  
59  
60

## ABSTRACT

**Background:** It is uncertain whether multiple health behaviour change interventions (MHBC) are effective for the primary prevention of cardiovascular disease (CVD) in primary care. A systematic review and meta-analysis were performed to evaluate the effectiveness of MHBC interventions on CVD-risk and CVD risk factors; the study also evaluated associations of theoretical frameworks and intervention components with intervention effectiveness.

**Methods:** The search included randomised controlled trials of MHBC interventions aimed at reducing CVD-risk in primary prevention population up to 2017. Theoretical frameworks and intervention components were evaluated using standardised methods. Meta-analysis with stratification and meta-regression were used to evaluate intervention effects.

**Results:** We identified 31 trials (36,484 participants) with a minimum duration of 12 months follow-up. Pooled net change in systolic blood pressure (16 trials) was -1.86 (95% confidence interval -3.17 to -0.55,  $P=0.01$ ) mm Hg, diastolic blood pressure (15 trials) -1.53 (-2.43 to -0.62,  $P=0.001$ ) mm Hg, body mass index (14 trials) -0.13 (-0.26 to -0.01,  $P=0.04$ )  $\text{Kg/m}^2$  and serum total cholesterol (14 trials) -0.13 (-0.19 to -0.07,  $P<0.001$ ) mmol/L. There was no significant association between interventions with a reported theoretical basis and improved intervention outcomes. No association was observed between intervention intensity (number of sessions and intervention duration) and intervention outcomes. There was significant heterogeneity for some risk factor analyses, leading to uncertain validity of some pooled net changes.

**Conclusions:** MHBC interventions delivered to CVD-free participants in primary care did not appear to have quantitatively important effects on CVD risk factors. Better reporting of interventions' rationale, content and delivery is essential to understanding their effectiveness.

1  
2  
3  
4  
5  
6  
7  
8  
9  
10  
11  
12  
13  
14  
15  
16  
17  
18  
19  
20  
21  
22  
23  
24  
25  
26  
27  
28  
29  
30  
31  
32  
33  
34  
35  
36  
37  
38  
39  
40  
41  
42  
43  
44  
45  
46  
47  
48  
49  
50  
51  
52  
53  
54  
55  
56  
57  
58  
59  
60

**Key words:** Cardiovascular Diseases, Health Behaviour, Primary Health Care, Meta-analysis, Primary Prevention, Risk Factors.

For peer review only

**Strengths and limitations:**

- The review presents evidence of head to head meta-analysis of 31 published randomised controlled trials of MHBC interventions and cardiovascular risk with follow-up for 12 months or longer.
- The study employed standardised instruments to evaluate the impact of theory use and behaviour change techniques in MHBC interventions.
- The majority of trials included were conducted in Europe and United States and only English language publications were included.
- Not all studies evaluated all outcomes of interest and some lacked detail concerning intervention design and delivery.

## INTRODUCTION

Cardiovascular disease (CVD) is the leading cause of death worldwide, accounting for over 30% of global mortality<sup>1</sup>. CVD is mediated by several antecedent behavioural risk factors, and its onset might be prevented or delayed by altering one or several risk factors<sup>1</sup>. Risk factors for CVD are inter-related and often coexist<sup>2-4</sup>. This observation has informed the development of multiple health behaviour change (MHBC) interventions for reduction of CVD-risk. Identifying individuals at high-risk of CVD in primary care, and encouraging lifestyle change to reduce risk factors, represents a widely used strategy for the primary prevention of cardiovascular diseases. Randomised controlled trials have been conducted in primary care to evaluate the effectiveness of MHBC interventions using lifestyle modification techniques instead of, or in addition to, pharmacological treatment to modify CVD risk factors. These trials have generally provided only equivocal evidence for reduction of CVD incidence through MHBC but the degree of effectiveness might be associated with level of risk<sup>5-7</sup>. Results from Ebrahim et al.'s<sup>5</sup> systematic review suggested that MHBC interventions have negligible effect on mortality in unselected populations, with a pooled odds ratio for coronary heart disease mortality of 0.99 (95% CI 0.92 to 1.07). Evidence of benefit was found in studies in high-risk populations including people with hypertension (OR 0.78, 0.68 to 0.89) or diabetes (OR 0.71, 0.61 to 0.83)<sup>5</sup>. However, general health checks were not found to reduce all cause-mortality, nor CVD- or cancer-related morbidity and mortality<sup>8</sup>.

Previous reviews have assessed the effectiveness of MHBC interventions in reducing CVD morbidity and mortality<sup>5,6,8</sup>, less is known about the effectiveness of these interventions in reducing CVD-risk and risk factor values in primary care.

1  
2  
3 In recent years, there has been growing appreciation of the role of employing psychological  
4 theory in behaviour change intervention design, and studying the impact of specific  
5 behaviour change techniques (BCT) on intervention outcomes<sup>9</sup>. Theories of the  
6 psychological determinants of behaviour can be used to inform the development and  
7 evaluation of behaviour change interventions<sup>10</sup>. Interventions are likely to be more effective  
8 when they systematically target psychological determinants of behaviour<sup>11</sup>. A review of  
9 internet-based interventions suggested that more intensive use of theory was associated  
10 with greater behaviour change<sup>12</sup>, but another review found little evidence of an association  
11 between theory use and intervention effects on healthy eating or physical activity<sup>13</sup>. This  
12 equivocal evidence could arise if a high proportion of behaviour change interventions are not  
13 based on a theory or the theory is not applied extensively<sup>14</sup>.  
14  
15  
16  
17  
18  
19  
20  
21  
22  
23  
24  
25  
26  
27

28 Behaviour change techniques (BCT) are ‘the active components of an intervention designed  
29 to change behaviour’<sup>15</sup>. Identifying specific BCTs associated with greater impact on  
30 intervention effectiveness is essential for future intervention design<sup>16</sup>. Previous reviews  
31 suggested that interventions using the BCTs “provision of instructions,” “self-monitoring of  
32 behaviour,” “relapse prevention,” and “prompt practice” led to greater reductions in weight  
33 among obese individuals<sup>17</sup>, while interventions designed to modify physical activity and/or  
34 diet were more effective when they included self-monitoring plus one of the four following  
35 behaviour change techniques: prompting intention formation, specific goal setting, review of  
36 behavioural goals or providing feedback on performance<sup>18</sup>. Identifying BCTs associated with  
37 greater intervention effectiveness and exploring the impact of applying theory will contribute  
38 to the design of future MHBC interventions targeting CVD risk in primary care.  
39  
40  
41  
42  
43  
44  
45  
46  
47  
48  
49  
50  
51  
52  
53  
54  
55  
56  
57  
58  
59  
60



## Objectives

This systematic review had three objectives: first, to assess the effectiveness of MHBC interventions, directed at changing two or more behaviours, at reducing CVD-risk and CVD risk factors in adults without existing cardiovascular conditions; secondly, to evaluate whether using theory to develop interventions is associated with intervention effectiveness; and thirdly, to evaluate the association between behaviour change techniques employed and intervention effects.

For peer review only

## METHODS

Studies were selected according to the following criteria:

### Participants

Trials that recruited an adult population (>18 years old) free of CVD were included. Following previous reviews<sup>5</sup>, we included trials with less than 20% participants with CVD. Studies of patient populations with established disease, such as diabetes, were excluded.

### Interventions

We included studies that evaluated behaviour change interventions aimed at reducing CVD-risk by intervening on two or more risk behaviours at the same time. Risk behaviours included: physical activity, diet, alcohol consumption, use of stress management and smoking. Comparators were usual care or less intensive interventions.

### Settings

Interventions where participants were recruited, and interventions were delivered by trained healthcare professionals or primary care staff, in primary care premises (including general practice, family practice or primary care clinic).

### Study design

Controlled trials, with individual or cluster randomisation, providing  $\geq 12$  month follow-up for outcome evaluation.

### Outcome measures

Long term outcomes of MHBC interventions including CVD mortality and clinical events have been reported previously<sup>5 6</sup> and only one study in 2015 included clinical events as an outcome. Therefore long term outcomes were not included in this systematic review. Primary outcomes were changes in CVD-risk scores, body mass index (BMI) or body weight, blood pressure, and serum total cholesterol levels. We have excluded diabetes management trials, therefore, diabetes control outcomes were not included. Secondary outcomes were changes in physical activity, diet, smoking and alcohol consumption.

### Language

Studies reported in English.

### Search strategy

Multiple sources of ascertainment were used, including electronic databases (Medline, EMBASE, PsycINFO and CENTRAL) and searching reference lists of included papers. The search results and search terms of previous review<sup>5</sup> were used with searching extended from 2006 until February 2017. Search terms used included primary prevention, multiple risk factor, lifestyle intervention, health education and health promotion. Appendix A presents the search strategies used. Titles were screened by one reviewer (SA) and a second reviewer (MG) checked a random set of studies, approximately 10% of the search results, to assess agreement regarding whether they met the inclusion criteria. Disagreements were resolved through discussion, until full agreement was reached. The selection process is displayed in Figure 1.

### Methodologic quality

Studies were evaluated using the Cochrane risk of bias tool<sup>19</sup>. This assesses six domains of bias including selection bias, performance bias, detection bias, attrition bias, reporting bias and other biases<sup>19</sup>.

### Data extraction

Interventions were coded by country, target behaviours, participant and intervention characteristics, mode of delivery and intervention outcomes. We attempted to contact study authors to provide additional information where necessary. However, when information was not available, we assumed missing outcome data to occur at random.

In addition, Michie and Prestwich's<sup>20</sup> method of assessing the application of theory in the development and evaluation of behaviour change interventions was used. The Theory Coding Scheme (TCS) consists of 19 items that cover different aspects that may be informed by theory<sup>20</sup>. We used three measures to capture the extent of theory use, as employed in a previous review<sup>13</sup>: The first concerned whether the intervention was explicitly based on a theory or combination of theories or predictors (TCS item 5). Secondly, we assessed the degree to which each BCT reported as part of the intervention was linked to a theory-relevant construct (scored +2 for the ideal scenario of "yes" to TCS item 7 (all intervention techniques explicitly linked to at least one theory-relevant construct), +1 for studies coded "yes" for TCS item 8 (at least one, but not all, intervention techniques explicitly linked to at least one theory-relevant construct) and/or TCS item 9 (group of BCTs are linked to a group of constructs) and 0 for studies coded "no" for all of items 7-9). Finally, we rated the extent to which all constructs in the relevant theory had been explicitly targeted by BCTs. This was scored +2 for the ideal scenario of "yes" to TCS item 10 (all theory-relevant constructs explicitly linked to at least one BCT), +1 for "yes" to TCS item 9 (group of BCTs are linked to a group of constructs) and/or item 11 (at least one, but not all, theory relevant

1  
2  
3 constructs are explicitly linked to at least one BCT) and 0 for interventions coded “no” to all  
4  
5 of items 9-11.  
6  
7  
8  
9

10 The theory-based taxonomy of 93 behaviour change techniques developed by Michie,  
11 Richardson et al.<sup>9</sup> was used to identify intervention techniques. The assessment was  
12 completed by two researchers (LM and SA) with good agreement for intervention groups  
13 (77.8% agreement) and control groups (92.6% agreement). Discrepancies were discussed  
14 and resolved to reach full agreement. Intervention characteristics and BCTs were also  
15 extracted from descriptions of the control group, because the chosen nature of the control  
16 group can influence the apparent effectiveness of interventions<sup>21</sup>. Where detail of  
17 interventions was lacking, we attempted to contact study authors to provide additional  
18 information.  
19  
20  
21  
22  
23  
24  
25  
26  
27  
28  
29  
30  
31

### 32 **Data analysis**

33  
34 Outcome data were combined in random effects meta-analyses using ‘metan’ commands in  
35 STATA. DerSimonian and Laird<sup>22</sup> random effect models were chosen due to the  
36 considerable heterogeneity for certain outcomes. For continuous outcomes we used mean  
37 changes in each trial arm to calculate net effects. We expressed effects for binary variables  
38 as risk differences. We quantified statistical heterogeneity using  $I^2$  statistic. We have  
39 examined the influence of individual studies in outcomes with considerable heterogeneity  
40 ( $I^2 > 50\%$ ) by omitting one study at a time to see the extent to which heterogeneity could be  
41 explained by a study or group on studies (leave-one-out analysis).  
42  
43  
44  
45  
46  
47  
48  
49  
50

51  
52 Meta-regression analyses were used to examine the effect of medication use, number of  
53 interventions’ sessions, intervention duration, types of BCTs used and theory use on  
54 intervention outcomes. Intervention duration was calculated by multiplying the number of  
55 sessions and the sessions’ duration. Publication bias was assessed using Egger’s  
56  
57  
58  
59  
60

1  
2  
3 regression test<sup>23</sup> using 'metabias' and 'metafunnel' commands in STATA. If bias existed, the  
4 "trim and fill"<sup>24</sup> method was used to adjust for publication bias. Mendis et al<sup>25</sup> Nigeria site's  
5 study had unusually high summary estimates, and heterogeneity diminished substantially  
6 after this study was excluded. This study was therefore treated as an outlier and results were  
7 reported with the exclusion of this study.  
8  
9  
10  
11  
12  
13  
14  
15  
16  
17  
18  
19  
20  
21  
22  
23  
24  
25  
26  
27  
28  
29  
30  
31  
32  
33  
34  
35  
36  
37  
38  
39  
40  
41  
42  
43  
44  
45  
46  
47  
48  
49  
50  
51  
52  
53  
54  
55  
56  
57  
58  
59  
60

## RESULTS

The initial search identified 26656 references, with 55 relevant trials identified from the previous systematic review<sup>5</sup>. After removing duplicates, 21089 titles were screened. A total of 31 trials were included in this review (Figure 1).

### Included studies

We identified a total of 31 trials of MHBC intervention for the primary prevention of CVD in primary care with 36484 participants. The duration of follow-up ranged from 12 months to 6 years (median 12 months). Intervention duration ranged from two months up to three years (median 12 months). Summary of included studies characteristics are presented in table 1 and supplementary table 1.

**Table 1: Summary of characteristics of 27 trials included in the review. Figures are frequencies (column percent).**

| Characteristics                      |                           | Freq. (%)     |
|--------------------------------------|---------------------------|---------------|
| <b>Total</b>                         |                           | 31 (100)      |
| <b>Country</b>                       | UK                        | 6 (19.4%)     |
|                                      | Sweden                    | 5 (16.1%)     |
|                                      | Netherlands               | 4 (12.9%)     |
|                                      | USA                       | 4 (12.9%)     |
|                                      | Europe                    | 7 (22.6%)     |
|                                      | Others                    | 5 (16.1%)     |
| <b>Number of participants</b>        | Median (IQR)              | 419 (224-883) |
| <b>Gender</b>                        | Male only                 | 1 (3.2)       |
|                                      | Female only               | 1 (3.2)       |
|                                      | Both                      | 29 (93.5)     |
| <b>Age</b>                           | Minimum age, median (IQR) | 30 (20-40)    |
|                                      | Maximum age, median (IQR) | 65 (60-74)    |
| <b>Intervention outcomes</b>         | CVD risk                  | 14 (45.2)     |
|                                      | Body weight               | 25 (80.6)     |
|                                      | Blood pressure            | 26 (83.9)     |
|                                      | Serum cholesterol         | 26 (83.9)     |
|                                      | Diet                      | 18 (58.1)     |
|                                      | Physical activity         | 21 (67.7)     |
|                                      | Alcohol                   | 6 (19.4)      |
|                                      | Smoking                   | 15 (48.4)     |
| <b>Number of targeted behaviours</b> | 2 behaviours              | 11 (35.5)     |
|                                      | 3 behaviours              | 12 (38.7)     |
|                                      | 4 behaviours              | 7 (22.6)      |
|                                      | 5 behaviours              | 1 (3.2)       |
| <b>Follow-up duration</b>            | 12 months                 | 18 (58.1)     |
|                                      | >12 months                | 13 (41.9)     |

CVD, cardiovascular disease; IQR, interquartile range



### Study characteristics

Diet and physical activity were targeted in 11 trials, with nine trials targeting diet, physical activity and smoking. Diet, physical activity, smoking and alcohol consumption were targeted in seven interventions and two interventions targeted diet, physical activity and stress management. Only one intervention targeted diet, physical activity, stress and alcohol consumption and one intervention targeted all five behaviours. A wide range of intervention modalities was investigated (Table 2 and supplementary table 2), including individual and group sessions, telephone conversations and provision of written materials. The majority of the included trials reported offering “usual care” to the control group, with few details provided. Seven trials offered face-to-face sessions and seven trials offered face-to-face sessions and written materials. Written materials alone were offered in three trials and no intervention was offered to the control group in three interventions.

**Table 2: Summary of interventions characteristics for 27 trials included in the review.  
Figures are frequencies (column percents)**

|                                                                    |                                                 | Intervention<br>N (%) | Control<br>N (%) |
|--------------------------------------------------------------------|-------------------------------------------------|-----------------------|------------------|
| <b>Type of staff<br/>delivering<br/>intervention</b>               | GPs and physicians                              | 10 (32.3)             |                  |
|                                                                    | Nurses                                          | 15 (48.4)             |                  |
|                                                                    | Dietitian                                       | 7 (22.6)              |                  |
|                                                                    | Others                                          | 12 (38.7)             |                  |
| <b>Mode of<br/>intervention<br/>delivery</b>                       | Face to face sessions                           | 30 (96.8)             | 14 (45.2)        |
|                                                                    | Group sessions                                  | 9 (29.0)              | 1 (3.2)          |
|                                                                    | Written materials                               | 15 (48.4)             | 7 (22.6)         |
|                                                                    | Telephone sessions                              | 8 (25.8)              | -                |
|                                                                    | Unclear                                         | -                     | 13 (41.9)        |
| <b>Number of<br/>intervention<br/>sessions</b>                     | 1-4 sessions                                    | 5 (16.1)              | 9 (29.0)         |
|                                                                    | 5-9 sessions                                    | 11 (35.5)             | 2 (6.5)          |
|                                                                    | 10-15 sessions                                  | 4 (12.9)              | 1 (3.2)          |
|                                                                    | >15 sessions                                    | 5 (16.1)              | 1 (3.2)          |
|                                                                    | Unclear                                         | 6 (19.4)              | 18 (58.1)        |
| <b>Number of<br/>behaviour<br/>change<br/>techniques<br/>(BCT)</b> | 1-2 BCTs                                        | 5 (16.1)              | 14 (45.2)        |
|                                                                    | 3-4 BCTs                                        | 10 (32.3)             | 1 (3.2)          |
|                                                                    | 5-6 BCTs                                        | 12 (38.7)             | -                |
|                                                                    | 7-9 BCTs                                        | 3 (9.7)               | -                |
|                                                                    | 10 BCTs                                         | 1 (3.2)               | -                |
|                                                                    | Unclear                                         | -                     | 16 (51.6)        |
| <b>Frequently<br/>used<br/>behaviour<br/>change<br/>techniques</b> | Credible source (9.1)                           | 22 (70.9)             | 6 (19.4)         |
|                                                                    | Goal setting (behaviour) (1.1)                  | 19 (61.3)             | 2 (6.5)          |
|                                                                    | Information about health consequences (5.1)     | 9 (29.0)              | 5 (16.1)         |
|                                                                    | Instruction on how to perform a behaviour (4.1) | 9 (29.0)              | 1 (3.2)          |
|                                                                    | Action planning (1.4)                           | 9 (29.0)              | -                |
|                                                                    | Self-monitoring of behaviour (2.3)              | 8 (25.8)              | -                |

### **Risk of bias in included studies**

Risk of bias assessment is presented in supplementary table 3. Half of the included trials (n=16) reported using intention-to-treat (ITT) analysis, while 15 studies did not state ITT procedures. Loss to follow-up ranged from 1.5% to 50.9%. Random allocation methods were not usually reported. In only 14 out of 31 trials the method used was considered adequate. It is not possible to blind participants and personnel to treatment allocation in lifestyle intervention, which raises the possibility of bias inevitably. Only 5 trials have reported blinding of participants and personnel. Eleven trials have reported blinding outcomes assessors to treatment allocation, this too makes the assessment of outcomes likely biased (e.g. self-reported outcomes). Not all trials reported sufficient detail to assess risk of bias and these were rated as 'unclear'.

### **Treatment fidelity**

Few studies reported using fidelity checks<sup>26-30</sup> to confirm that interventions were delivered as intended and this raises a question of whether the interventions were delivered as planned, and in a consistent manner.

### **Effect of interventions**

Pooled effect sizes for all outcomes are presented in Table 3 and forest plots are presented in Appendix B.

**Table 3: Pooled effects from meta-analysis of multiple health behaviour interventions on CVD-risk and CVD risk factors.**

| Outcome                                            | N  | Pooled effect size      | 95% confidence interval | P value        | I <sup>2</sup> (%) | P value for heterogeneity | Tau <sup>2</sup> |      |
|----------------------------------------------------|----|-------------------------|-------------------------|----------------|--------------------|---------------------------|------------------|------|
| Systolic blood pressure (mmHg)                     | 16 |                         | -1.86                   | -3.17 to -0.55 | 0.01               | 63.0                      | <0.001           | 3.91 |
| Systolic blood pressure (mmHg) by medication use   | 10 | Medication              | -2.59                   | -4.48 to -0.69 | 0.01               | 68.3                      | 0.001            | 5.31 |
|                                                    | 6  | None <sup>a</sup>       | -0.55                   | -1.69 to 0.59  | 0.35               | 3.4                       | 0.40             | 0.09 |
| Diastolic blood pressure (mmHg)                    | 15 |                         | -1.53                   | -2.43 to -0.62 | 0.001              | 68.3                      | <0.001           | 1.92 |
| Diastolic blood pressure (mmHg) by medication use  | 10 | Medication <sup>a</sup> | -1.96                   | -2.79 to -1.11 | <0.001             | 42.5                      | 0.07             | 0.66 |
|                                                    | 5  | None                    | -0.78                   | -2.50 to 0.93  | 0.37               | 73.0                      | <0.001           | 2.97 |
| Serum total cholesterol (mmol/L)                   | 14 |                         | -0.13                   | -0.19 to -0.07 | <0.001             | 20.3                      | 0.22             | 0.0  |
| Serum total cholesterol (mmol/L) by medication use | 8  | Medication              | -0.15                   | -0.26 to -0.03 | 0.01               | 43.8                      | 0.09             | 0.01 |
|                                                    | 6  | None <sup>a</sup>       | -0.11                   | -0.18 to -0.03 | 0.01               | 0.0                       | 0.60             | 0.0  |
| Smoking (%)                                        | 11 |                         | -0.00                   | -0.02 to 0.01  | 0.66               | 13.4                      | 0.31             | 0.0  |
| Body mass index (Kg/m <sup>2</sup> )               | 14 |                         | -0.13                   | -0.26 to -0.01 | 0.04               | 0.0                       | 0.82             | 0.0  |
| Body weight (Kg)                                   | 10 |                         | -0.91                   | -1.39 to -0.43 | <0.001             | 12.1                      | 0.33             | 0.08 |
| CVD-risk using SCORE (%)                           | 2  |                         | 0.12                    | -0.37 to 0.61  | 0.61               | 0.0                       | 0.87             | 0.0  |
| Systolic blood pressure (mmHg) by theory use       | 5  | Theory                  | -2.18                   | -5.92 to 1.56  | 0.25               | 72.3                      | 0.01             | 13.0 |
|                                                    | 11 | None <sup>b</sup>       | -1.69                   | -3.01 to -0.29 | 0.02               | 61.3                      | <0.01            | 3.01 |
| Diastolic blood pressure (mmHg) by theory use      | 5  | Theory                  | -1.25                   | -2.43 to -0.06 | 0.04               | 0.4                       | 0.40             | 0.01 |
|                                                    | 10 | None <sup>b</sup>       | -1.67                   | -2.83 to -0.52 | <0.001             | 76.9                      | <0.001           | 2.42 |
| Serum total cholesterol (mmol/L) by theory use     | 4  | Theory                  | -0.03                   | -0.15 to 0.10  | 0.68               | 0.0                       | 0.48             | 0.0  |
|                                                    | 10 | None <sup>b</sup>       | -0.13                   | -0.20 to -0.07 | <0.001             | 0.0                       | 0.29             | 0.0  |
| Body mass index(Kg/m <sup>2</sup> ) by theory use  | 5  | Theory                  | -0.15                   | -0.41 to 0.10  | 0.24               | 0.0                       | 0.96             | 0.0  |
|                                                    | 9  | None <sup>b</sup>       | -0.13                   | -0.28 to 0.02  | 0.10               | 0.0                       | 0.44             | 0.0  |
| Body weight by (Kg) theory use                     | 4  | Theory                  | -0.24                   | -0.94 to 0.45  | 0.49               | 0.0                       | 0.97             | 0.0  |
|                                                    | 8  | None <sup>b</sup>       | -1.32                   | -1.80 to -0.83 | <0.001             | 0.0                       | 0.53             | 0.0  |

N, number of trials; I<sup>2</sup>, index of heterogeneity; a, medication use is not reported; b, theory use is not reported.

## Changes in CVD risk factors

**Blood pressure:** Sixteen trials<sup>25 27 31-44</sup> reported changes in participants' systolic blood pressure (SBP) with no evidence of publication bias (Egger's test,  $P=0.79$ ). The weighted mean difference in SBP was  $-1.86$  mm Hg (95% CI  $-3.17$  to  $-0.55$  mm Hg;  $P=0.01$ ). Diastolic blood pressure (DBP) was reported in 15 trials<sup>25 27 31-33 35-44</sup>, with no evidence of publication bias (Egger's test,  $P=0.19$ ). Weighted mean difference in DBP was  $-1.53$  mmHg ( $-2.43$  to  $-0.62$  mm Hg;  $P=0.001$ ). Out of the 12 interventions that evaluated blood pressure, seven reported that participants in all study groups were taking antihypertensive medications and three reported they were taking unspecified medications. There is no significant differences between the impact of trials that reported use of medication on SBP ( $\beta=-1.72$ ,  $P=0.23$ ) and DBP ( $\beta=-1.46$ ,  $P=0.12$ ) compared to trials that did not report using medications.

**Serum total cholesterol:** Fourteen trials<sup>27 31-33 35-37 39-45</sup> evaluated serum total cholesterol and provided sufficient data for analysis (Egger's test,  $P=0.55$ ). Serum total cholesterol levels showed a small decrease in favour of intervention ( $-0.13$  mmol/L; 95%  $-0.19$  to  $-0.07$ ;  $P<0.001$ ). Six of the trials included in the analysis reported the use of lipid lowering medication and two reported the use of unspecified medication by all study groups. The weighted mean difference for total cholesterol was not different between trials that reported using medication and trials that have not stated using medications ( $\beta=0.01$ ,  $P=0.75$ ) (Table 3).

**Smoking:** Eleven studies<sup>25 26 29-32 34 37 44 46 47</sup> reported smoking prevalence following the intervention. The pooled analysis showed no evidence of reductions in smoking behaviour (RD  $-0.00\%$ ; 95% CI  $-0.02$  to  $0.01$ ;  $P=0.66$ ). All studies included in the analysis relied on

1  
2  
3 self-reported smoking status and only two<sup>29 44</sup> reported using smoking cessation medication.  
4  
5 There was no evidence of publication bias (P=0.47).  
6  
7  
8  
9

10 **Weight and body mass index (BMI):** Fourteen studies<sup>25 27 31 33 35-44</sup> reported on BMI as an  
11  
12 outcome. The weighted mean change was -0.13 kg/m<sup>2</sup> (95% CI -0.26 to -0.01; P=0.04). The  
13  
14 results of “trim and fill” method indicated that the weighted mean did not change despite the  
15  
16 existence of publication bias (Egger’s test P=0.002). Fewer studies (n=12)<sup>27 33 35-37 40-44 47 48</sup>  
17  
18 reported on weight changes, showing a reduction of -0.91 kg (CI -1.39 to -0.43 kg; P< 0.001)  
19  
20 with no evidence of publication bias (P=0.97).  
21  
22  
23

24 **Dietary behaviour:** Sixteen trials<sup>25-30 33 34 42-45 47-50</sup> reported dietary behaviours as an  
25  
26 outcome of the interventions. Outcomes of dietary interventions were measured using  
27  
28 diverse methods, therefore, a meta-analysis was not conducted. Trials used a range of  
29  
30 dietary self-report instruments to assess dietary behaviour, and none have used additional  
31  
32 objective measures. Fruit and vegetable consumption was reported either as portions per  
33  
34 day<sup>25-27 43 47 50</sup>, or proportion of participants who met the recommendation for fruits and  
35  
36 vegetable intake<sup>26 33 34</sup>. There was no positive effect of the intervention on fruits and  
37  
38 vegetable consumption in most of the trials<sup>26 27 34 47</sup>, and some trials did report improvement  
39  
40 following the intervention<sup>33 43 50</sup>, Fat intake was commonly measured as a dietary outcome  
41  
42 either in terms of fat intake per day,<sup>27 33 48 49</sup> or as a fat score<sup>29 34</sup>. All the trials reported  
43  
44 reductions in fat intake after the intervention, except Koelewijn-van Loon et al.<sup>34</sup> trial, where  
45  
46 there was no significant difference between the intervention and control group.  
47  
48  
49  
50

51  
52 **Physical activity behaviour:** Twenty trials reported changes in physical activity<sup>26-34 36 37 39 40</sup>  
53  
54 42-44 46 47 50 51. Physical activity was assessed via self-report. Due to the variety of  
55  
56 measurements used, meta-analysis was not feasible. Some trials reported physical activity  
57  
58  
59  
60

1  
2  
3 as the proportion of participants who are physically active<sup>29 31 39 46 50</sup>. Other studies  
4 measured physical activity as the number of minutes per week,<sup>27 34 42 43</sup> or classified  
5 participants based on their weekly exercise<sup>26 28 44 50</sup>. Eight of these trials<sup>27 29 30 36 37 40 42 44 47 50</sup>  
6  
7 resulted in an increase in reported physical activity following the intervention, and nine<sup>26 28 31-</sup>  
8  
9  
10  
11  
12  
13  
14  
15  
16  
17  
18  
19  
20  
21  
22  
23  
24  
25  
26  
27  
28  
29  
30  
31  
32  
33  
34  
35  
36  
37  
38  
39  
40  
41  
42  
43  
44  
45  
46  
47  
48  
49  
50  
51  
52  
53  
54  
55  
56  
57  
58  
59  
60

33 39 43 46 48 51 trials concluded that the intervention had no impact on physical activity.

**Alcohol consumption:** Alcohol consumption was reported as an outcome in seven trials<sup>30</sup>  
34 40 46-48 50. However, it was measured differently, which did not allow for pooled effect  
analysis. Two trials<sup>40 46</sup> reported reductions in alcohol consumption following the  
interventions, whereas the majority of the studies<sup>30 34 47 48 50</sup> did not find significant reductions  
in alcohol intake.

**Cardiovascular disease risk:** Studies used different risk scores to examine the effect of  
interventions on CVD-risk. Two studies<sup>38 51</sup> used the Framingham risk equation<sup>52</sup>, two  
studies<sup>30 53</sup> used the Dundee risk score<sup>54</sup> and one study<sup>44</sup> used QRISK2 score<sup>55</sup>. These  
trials reported larger CVD-risk reductions in the intervention group compared to the control  
group. All of these trials had missing data making it not possible to analyse the pooled effect.  
Four studies<sup>26 34 39 46</sup> used the SCORE risk equation<sup>56</sup>, however because of missing data we  
only included two studies<sup>26 34</sup> in the analysis, both conducted in the Netherlands. There was  
a non-significant increase in weighted mean difference of 0.12% CVD-risk (95% CI -0.37 to  
0.61; P= 0.62).

#### **Sensitivity analysis:**

In outcomes of considerable heterogeneity ( $I^2 > 50\%$ ) we sought to identify possible causes  
by exploring the effect of included studies using leave-one-out sensitivity analysis. The  
absence of study Mendis et al. (China site)<sup>25</sup> and Koelewijn-van Loon, et al.<sup>34</sup> in analysing

1  
2  
3 the impact of interventions of systolic blood pressure reduces heterogeneity from  $I^2= 63\%$  to  
4  
5  $I^2= 49.4\%$  and generated a weighted mean difference (-1.86; CI -3.17 to -0.54;  $P=0.001$ )  
6  
7 similar to the one obtained with all 16 trials. For diastolic blood pressure, removing Knutsen  
8  
9 and Knutsen<sup>31</sup> from the analysis have resulted in reducing heterogeneity from  $I^2= 68.3\%$  to  
10  
11  $I^2= 37.8\%$  and produced a larger weighted mean difference (-1.93; CI -2.69 to -1.18;  
12  
13  $P<0.001$ ).

### 14 15 16 17 18 19 **Intervention components:**

20  
21 **Intervention time and number of sessions:** The number of sessions was reported in 24  
22  
23 trials, ranging from three to 56 sessions (median=6 sessions). No significant associations  
24  
25 were detected between the number of sessions and SBP ( $\beta= -0.17$ ,  $P=0.15$ ), DBP ( $\beta= -0.15$ ,  
26  
27  $P= 0.08$ ), BMI ( $\beta= -0.01$ ,  $P=0.57$ ) and weight ( $\beta= 0.02$ ,  $P=0.68$ ). Interventions with more  
28  
29 sessions were associated with slight reductions in serum total cholesterol ( $\beta=-0.01$ ,  $P=$   
30  
31  $0.02$ ). Thirteen of the included trials provided enough details to calculate intervention  
32  
33 delivery duration, which ranged from 45 mins to 2.5 hrs (median=300 mins). No significant  
34  
35 associations were detected between intervention duration and SBP ( $\beta=-0.00$ ,  $P=0.26$ ), DBP  
36  
37 ( $\beta=-0.00$ ,  $P= 0.45$ ), BMI ( $\beta= -0.00$ ,  $P= 0.53$ ) and weight ( $\beta= -0.00$ ,  $P=0.55$ ). Hence, more  
38  
39 sessions and longer intervention duration were not necessarily associated with greater  
40  
41 intervention effectiveness.  
42  
43

44  
45 **Theory use:** Of the 31 trials included, nine reported some use of psychological theory (or a  
46  
47 combination of two theories) in relation to the intervention. The Transtheoretical Model<sup>57</sup>  
48  
49 was used in eight trials<sup>27 28 36-40 47</sup>, while Social Cognitive Theory<sup>58</sup> was used in four<sup>27 28 38 59</sup>  
50  
51 interventions.  
52

53  
54 We tested the extent of theory use using Theory Coding Scheme (TCS)<sup>20</sup> in three ways  
55  
56 (supplementary table 4). The first method was based on the use of theory in selecting  
57  
58 intervention techniques (item 5 in TCS). Only four trials were coded yes for this item. The  
59  
60



1  
2  
3 second method was used to reflect the extent to which reported BCTs were linked to theory-  
4 relevant constructs (items 7 to 9). Only four trials were coded yes to at least one of these  
5 items. The third method was used to reflect the extent to which all theory-relevant constructs  
6 were targeted by BCTs (items 9 to 11). Only four trials were coded yes to at least one of  
7 these items. Therefore, we were not able to examine the impact of differing levels of theory  
8 use on intervention outcomes due to the small number of trials using theory extensively.  
9 However, we were able to test whether studies that merely reported using a theory had  
10 greater impact on outcomes using meta-regression. There was no significant association  
11 between studies which reported using a theory and SBP ( $\beta = -0.13$ ,  $P = 0.89$ ), DBP ( $\beta = -0.37$ ,  
12  $P = 0.73$ ), and BMI ( $\beta = -0.03$ ,  $P = 0.87$ ). Studies that reported using a theory had increased  
13 weight ( $\beta = 1.07$ ,  $P = 0.03$ ,  $CI = 0.11, 2.04$ ) and serum total cholesterol outcomes ( $\beta = 0.19$ ,  $P =$   
14  $0.04$ ) compared to studies that did not report using a theory.  
15  
16  
17  
18  
19  
20  
21  
22  
23  
24  
25  
26  
27  
28  
29  
30

31 **Effectiveness of specific behaviour change techniques:** The number of behaviour  
32 change techniques (BCTs) in the intervention group varied, ranging from two to ten BCTs  
33 (median= 5). Behaviour change techniques in the control group were generally poorly  
34 described as the majority of trials ( $n = 16$ ) did not appear to offer any BCTs.  
35  
36  
37  
38

39 Twenty nine different BCTs were identified from the included trials (supplementary table 2).  
40 The most commonly used BCTs in the intervention group were 'credible source' and 'Goal  
41 setting (behaviour)', which were used in 22 and 19 trials respectively. In the control group,  
42 'Credible source' and 'Information about health consequences' were most commonly used,  
43 which were used in six and five interventions respectively.  
44  
45  
46  
47  
48  
49

50 We tested the potential impact of using specific BCTs on intervention outcomes (table 4).  
51 For SBP, one BCT had a significant influence on effect sizes. Interventions employing  
52 'Review of behaviour goal(s)' resulted in an increase in SBP ( $\beta = 3.45$ ,  $P = 0.04$ ) compared  
53 with those not using this BCT. For DBP and total cholesterol, there were no BCTs  
54  
55  
56  
57  
58  
59  
60

1  
2  
3 significantly associated with the effectiveness of the interventions. The same was the case  
4  
5 for BMI, but for weight, interventions that included 'Action planning' resulted in greater  
6  
7 reductions than those that did not ( $\beta = -1.10$ ,  $P = 0.04$ ).  
8  
9  
10  
11  
12  
13  
14  
15  
16  
17  
18  
19  
20  
21  
22  
23  
24  
25  
26  
27  
28  
29  
30  
31  
32  
33  
34  
35  
36  
37  
38  
39  
40  
41  
42  
43  
44  
45  
46  
47  
48  
49  
50  
51  
52  
53  
54  
55  
56  
57  
58  
59  
60

Table 4: Meta-regression results of intervention effects for studies using or not using particular behaviour change techniques.

| Outcome                  | BCT                                              | BCT included |                      |          | BCT not included |                       |           | $\beta$     | CI                  | P           |
|--------------------------|--------------------------------------------------|--------------|----------------------|----------|------------------|-----------------------|-----------|-------------|---------------------|-------------|
|                          |                                                  | MD           | CI                   | N        | MD               | CI                    | N         |             |                     |             |
| Systolic blood pressure  | 1.1 Goal setting (behaviour).                    | -1.12        | -2.49 to 0.25        | 11       | -3.87            | -5.07 to -2.67        | 5         | 2.79        | -0.19 to 5.78       | 0.07        |
|                          | 1.2 Problem solving.                             | -3.19        | -9.21 to 2.83        | 3        | -1.69            | -2.99 to -0.39        | 13        | -0.98       | -5.12 to 3.16       | 0.62        |
|                          | 1.3 Goal setting (outcome).                      | -3.01        | -6.99 to 0.97        | 3        | -1.65            | -3.12 to -0.18        | 13        | -1.11       | -4.95 to 2.73       | 0.55        |
|                          | 1.4 Action planning.                             | -2.84        | -5.29 to -0.39       | 7        | -1.39            | -3.01 to 0.23         | 9         | -1.39       | -4.54 to 1.76       | 0.36        |
|                          | <b>1.5 Review behaviour goal(s)</b>              | <b>0.93</b>  | <b>-2.10 to 3.95</b> | <b>4</b> | <b>-2.49</b>     | <b>-3.82 to -1.16</b> | <b>12</b> | <b>3.45</b> | <b>0.13 to 6.76</b> | <b>0.04</b> |
|                          | 4.1 Instruction on how to perform the behaviour. | -2.77        | -4.89 to -0.68       | 5        | -1.23            | -2.89 to 0.44         | 11        | -1.53       | -4.53 to 1.47       | 0.29        |
|                          | 5.1 Information about health consequences.       | -0.70        | -2.13 to 0.73        | 5        | -2.59            | -4.43 to -0.76        | 11        | 1.75        | -1.15 to 4.65       | 0.22        |
|                          | 9.1 Credible source.                             | -2.75        | -4.34 to -1.17       | 9        | -0.43            | -2.81 to 1.96         | 7         | -2.47       | -5.51 to 0.58       | 0.10        |
|                          | 9.2 Pros and cons.                               | 0.16         | -3.89 to 4.20        | 4        | -2.31            | -3.59 to -1.02        | 12        | 2.67        | -0.84 to 6.18       | 0.13        |
|                          | 11.2 Reduce negative emotions.                   | -3.52        | -4.93 to -2.11       | 4        | -1.05            | -2.46 to 0.37         | 12        | -0.22       | -5.48 to 5.03       | 0.93        |
| Diastolic blood pressure | 1.1 Goal setting (behaviour).                    | -1.18        | -2.31 to -0.04       | 10       | -3.37            | -3.78 to -0.96        | 5         | 1.35        | -0.89 to 3.60       | 0.22        |
|                          | 1.4 Action planning.                             | -2.17        | -4.13 to -0.20       | 6        | -1.28            | -2.30 to -0.25        | 9         | -0.82       | -3.02 to 1.38       | 0.44        |
|                          | 2.3 Self-monitoring of behaviour.                | -1.29        | -3.03 to 0.46        | 3        | -1.58            | -2.60 to -0.55        | 12        | 0.18        | -2.73 to 3.08       | 0.89        |
|                          | 4.1 Instruction on how to perform the behaviour. | -1.12        | -2.80 to 0.56        | 5        | -1.84            | -2.77 to -0.91        | 10        | 0.87        | -1.17 to 2.91       | 0.38        |
|                          | 5.1 Information about health consequences.       | -0.64        | -2.52 to 1.24        | 4        | -1.92            | -2.79 to -1.05        | 11        | 1.46        | -0.53 to 3.46       | 0.14        |
|                          | 9.1 Credible source.                             | -1.85        | -3.44 to -0.26       | 9        | -1.29            | -1.91 to -0.68        | 6         | -0.37       | -2.51 to 1.77       | 0.72        |
|                          | 9.2 Pros and cons.                               | -1.46        | -3.05 to 0.13        | 3        | -0.93            | -1.46 to 0.12         | 12        | 0.04        | -2.73 to 2.80       | 0.98        |
|                          | 11.2 Reduced negative emotions.                  | -2.98        | -4.71 to -1.25       | 4        | -1.25            | -2.25 to -0.25        | 11        | -1.78       | -4.46 to 0.89       | 0.17        |
| Serum total cholesterol  | 1.1 Goal setting (behaviour).                    | -0.11        | -0.17 to -0.5        | 9        | -0.17            | -0.34 to -0.01        | 5         | 0.09        | -0.08 to 0.26       | 0.29        |
|                          | 1.3 Goal setting (outcome).                      | -0.21        | -0.45 to 0.02        | 3        | -0.10            | -0.16 to -0.03        | 11        | -0.12       | -0.27 to 0.03       | 0.11        |
|                          | 1.4 Action planning.                             | -0.15        | -0.34 to 0.05        | 6        | -0.12            | -0.18 to -0.06        | 8         | -0.05       | -0.22 to -0.12      | 0.52        |
|                          | 4.1 Instruction on how to perform the behaviour. | -0.18        | -0.19 to -0.07       | 4        | -0.10            | -0.17 to -0.04        | 10        | -0.09       | -0.25 to 0.06       | 0.20        |
|                          | 5.1 Information about health consequences.       | -0.11        | -0.18 to -0.07       | 5        | -0.15            | -0.28 to -0.03        | 9         | 0.07        | -0.08 to -0.22      | 0.35        |
|                          | 9.1 Credible source.                             | -0.12        | -0.21 to -0.04       | 9        | -0.14            | -0.22 to -0.05        | 5         | -0.00       | -0.18 to 0.17       | 0.96        |
|                          | 9.2 Pros and cons.                               | -0.07        | -0.31 to 0.16        | 3        | -0.14            | -0.20 to -0.07        | 11        | 0.05        | -0.18 to 0.28       | 0.64        |
| Body mass index          | 1.1 Goal setting (behaviour).                    | -0.24        | -0.42 to -0.05       | 10       | -0.03            | -0.21 to 0.15         | 4         | -0.20       | -0.49 to 0.08       | 0.14        |
|                          | 1.3 Goal setting (outcome).                      | -0.09        | -0.50 to 0.32        | 3        | -0.14            | -0.27 to -0.00        | 11        | 0.05        | -0.42 to 0.52       | 0.83        |

|               |                                                   |              |                       |          |              |                      |          |              |                       |             |
|---------------|---------------------------------------------------|--------------|-----------------------|----------|--------------|----------------------|----------|--------------|-----------------------|-------------|
|               | 1.4 Action planning.                              | -0.32        | -0.61 to -0.04        | 6        | -0.09        | -0.23 to 0.06        | 8        | -0.24        | -0.59 to 0.11         | 0.17        |
|               | 1.5 Review behaviour goal(s)                      | -0.66        | -1.51 to 0.20         | 3        | -0.12        | -0.25 to 0.01        | 11       | -0.54        | -1.48 to 0.41         | 0.25        |
|               | 4.1 Instructions on how to perform the behaviour. | -0.07        | -0.23 to 0.09         | 5        | -0.24        | -0.45 to -0.03       | 9        | 0.17         | -0.12 to 0.46         | 0.23        |
|               | 5.1 Information about health consequences.        | -0.13        | -0.36 to 0.10         | 4        | -0.14        | -0.29 to 0.02        | 10       | 0.01         | -0.29 to 0.31         | 0.96        |
|               | 9.1 Credible source.                              | -0.24        | -0.43 to -0.06        | 8        | -0.03        | -0.21 to 0.15        | 6        | -0.21        | -0.49 to 0.07         | 0.13        |
|               | 9.2 Pros and cons.                                | -0.47        | -1.29 to 0.34         | 3        | -0.13        | -0.26 to 0.01        | 11       | -0.35        | -1.25 to 0.55         | 0.42        |
|               | 11.2 Reduce negative emotions.                    | -0.33        | -0.79 to 0.14         | 3        | -0.12        | -0.25 to 0.02        | 11       | -0.21        | -0.74 to 0.32         | 0.41        |
| <b>Weight</b> | 1.3 Goal setting (outcome)                        | -1.02        | -1.73 to -0.31        | 4        | -0.83        | -1.53 to -0.12       | 8        | -0.17        | -1.33 to 0.99         | 0.75        |
|               | <b>1.4 Action planning.</b>                       | <b>-1.27</b> | <b>-1.74 to -0.79</b> | <b>7</b> | <b>-0.17</b> | <b>-0.94 to 0.58</b> | <b>5</b> | <b>-1.10</b> | <b>-2.11 to -0.09</b> | <b>0.04</b> |
|               | 1.5 Review behaviour goal(s)                      | -1.67        | -4.77 to 1.40         | 3        | -0.86        | -1.42 to -0.29       | 9        | -0.82        | -4.41 to 2.77         | 0.62        |
|               | 2.3 Self-monitoring of behaviour.                 | -0.91        | -2.13 to 0.31         | 3        | -0.89        | -1.55 to -0.25       | 9        | -0.04        | -1.27 to 1.10         | 0.95        |
|               | 4.1 Instruction on how to perform the behaviour.  | -0.81        | -1.57 to -0.05        | 5        | -0.99        | -1.77 to -0.22       | 7        | 0.17         | -1.08 to 1.42         | 0.77        |
|               | 9.1 Credible source.                              | -0.95        | -1.52 to -0.38        | 8        | -0.27        | -1.89 to 1.35        | 4        | -0.65        | -2.66 to 1.36         | 0.49        |
|               | 9.2 Pros and cons.                                | -0.91        | -3.91 to 2.09         | 3        | -0.88        | -1.48 to -0.28       | 9        | -0.01        | -3.51 to 3.49         | 0.99        |

Note: BCT, behaviour change technique; MD, mean difference; CI, 95% confidence interval; N, number of trials;  $\beta$ , meta-regression coefficient

## DISCUSSION

This systematic review is among the first to evaluate the impact of theory use and BCTs in MHBC interventions for reducing CVD-risk. Although pooled effects of interventions on risk factors were statistically significant but clinically modest. The results of this systematic review suggest that MHBC interventions evaluated to date for the primary prevention of CVD may generally have very limited effects in reducing CVD-risk and CVD risk factors in primary care populations.

Previous systematic reviews have investigated the effectiveness of interventions aimed at individual risk factors including diet, physical activity and body weight<sup>6 60</sup>. These reviews generally find that behaviour change interventions in primary care have minor impact on risk factors values. The Cochrane review up to 2011 reported modest reductions in CVD risk factors following MHBC interventions that were slightly greater than we report<sup>5</sup>. However, the Cochrane review did not restrict the intervention setting to primary care.

Estimated changes in CVD risk factors should be viewed with caution. In the present set of trials, the average duration of follow-up was 12 months and changes in risk factors observed may be unlikely to reflect changes occurring over longer periods. This review found reductions in blood pressure and total cholesterol following intervention, but in some instances this might be mediated by pharmacological treatment. There are clear benefits of drug treatments in lowering blood pressure and cholesterol in primary prevention populations

<sup>61 62</sup>

Although this review focused on interventions for the primary prevention population, we also included trials that recruited a small minority of participants with some evidence of CVD.

1  
2  
3 Including these trials might have biased the results, as health promotion interventions might  
4 have more positive effects in people with established cardiovascular disease <sup>63-65</sup>.  
5  
6  
7  
8  
9

10 In order to account for heterogeneity, we focused on trial level covariates and identified  
11 characteristics that might be associated with more favourable outcomes. When coding  
12 BCTs, we were limited by the lack of detail provided in reports. We only coded what was  
13 explicitly referred to in intervention descriptions and could be fitted to BCT taxonomy  
14 definitions.  
15  
16  
17  
18  
19

20  
21  
22  
23 This review suggested no association between the number of intervention sessions or  
24 intervention duration and improved outcomes. Quantity of sessions would not necessarily  
25 have a beneficial impact on outcomes unless additional sessions deliver BCTs that  
26 effectively influence behaviours. Few reports provided sufficient information to permit  
27 calculating duration for analysis. Increasing use of the TIDieR checklist <sup>66</sup>, requiring  
28 intervention reports to detail the number and duration of sessions offered to participants, will  
29 be helpful for future reviews.  
30  
31  
32  
33  
34  
35  
36  
37  
38  
39

40  
41 Our analyses suggested that using certain BCTs has a moderator effect on intervention  
42 outcomes. In terms of biomarkers of CVD risk, no BCTs were identified as being particularly  
43 likely to influence cholesterol levels, while including review of behaviour goals appeared to  
44 be associated with slightly worse blood pressure outcomes.  
45  
46  
47  
48  
49

50 “Action planning” was associated with greater weight loss, while “instruction on how to  
51 perform the behaviour” was not. Both of these findings differ to those of a previous review <sup>17</sup>,  
52 perhaps because it focused only on interventions for obese individuals. The previous review  
53 also identified the BCTs of self-monitoring, relapse prevention/problem solving and prompt  
54  
55  
56  
57  
58  
59  
60

1  
2  
3 practice as beneficial to weight loss, but too few of the interventions included in the present  
4 review incorporated these BCTs for it to be possible to test their influence. A review of  
5 interventions promoting healthy eating and exercise also found that including the BCT of  
6 self-monitoring was associated with bigger changes in these behaviours<sup>18</sup>. Therefore, one  
7 explanation for the relatively limited effectiveness of the interventions reviewed in the  
8 present review is that they failed to include BCTs that were more likely to lead to health-  
9 promoting changes. A second possibility is that not all BCTs were delivered as the  
10 intervention designers intended. This cannot be ruled out as monitoring of treatment fidelity  
11 was rarely described in the included studies.  
12  
13  
14  
15  
16  
17  
18  
19  
20  
21  
22  
23

24 This review showed no association between the use of psychological theory and improved  
25 intervention outcomes. However, only a limited range of theories were employed – mostly  
26 the Transtheoretical Model and Social Cognitive Theory. A previous review also found that  
27 interventions based on these theories were not significantly more effective than interventions  
28 not explicitly based on theory<sup>13</sup>. A second issue is that the links between the psychological  
29 determinants specified by a theory and the BCTs employed in interventions were sometimes  
30 poorly articulated, with little evidence cited to justify choice of BCTs to change specific  
31 constructs. Furthermore, it was not always clear which BCTs were being used to target  
32 which behaviours as part of the MHBC interventions. Both this and previous reviews<sup>13 67</sup>  
33 found that reported theory use in intervention design was not as extensive as it could be. It is  
34 possible that interventions based on other theories or that more explicitly link theoretical  
35 constructs to select BCTs might be more effective.  
36  
37  
38  
39  
40  
41  
42  
43  
44  
45  
46  
47  
48

49 Future trials need to test interventions that provide explicit links between intervention  
50 components (i.e. theoretical basis, BCTs and intended mechanisms of action, intervention  
51 duration) and intervention outcomes as it is essential step towards understanding MHBC  
52 intervention effects. Higher priority should also be given to different population-level  
53 approaches to facilitate behaviour change.  
54  
55  
56  
57  
58  
59  
60

## Limitations

The results of this review must be viewed with caution because of several limitations. First, the observed effects were heterogeneous, therefore pooled estimates might be questionable. DerSimonian and Laird (DL)<sup>22</sup> random effects models were used. The DL method may lead to under-estimation of between trial variance leading to narrower confidence intervals in the presence of heterogeneity<sup>68 69</sup>. However, Thorlund, et al.<sup>70</sup> concluded that inferences concerning pooled effects were only infrequently influenced by the choice of between-trial variance estimator. The majority of trials included were undertaken in Europe (71%) and the United States (13%). Declines in CVD mortality and CVD-risk have been observed in these countries, and the results should be considered in the context of these trends. Groups of BCTs may have synergistic effects on behaviour<sup>16</sup>. However, due to the relatively small numbers of studies and under-description of the BCTs used in interventions, it was not possible to explore the impact of clusters of BCTs on CVD risk factors, as too few studies used the same clusters of BCTs and measured the same outcome. Furthermore, the differences between subgroups and covariates (i.e. theory use and BCTs) and effect size are observational and do not imply causality. Behavioural risk factors were assessed by self-report and so values were subject to social desirability and recall biases. Finally, as this review involved testing for the impact of MHBC interventions and intervention characteristics on intervention outcomes, we are aware of the need to adjust p-values based on the number of tests being made<sup>71</sup>. Although adjusting p-values reduces type 1 error, it increases the chances of false negatives<sup>72</sup>. Furthermore, tests were examining independent hypotheses, therefore p-values were not adjusted<sup>73</sup>.



## CONCLUSION

Existing multiple health behaviour change interventions delivered to individual participants in primary care appear to have limited effectiveness at reducing CVD-risk and CVD risk factors over twelve months or longer. Trial reports need to provide explicit explanation of the intervention theory, content and delivery, including fidelity and care provided to the control group in order to understand why an intervention may or may not prove effective. This is essential for future development and evaluation of effective CVD prevention interventions.

### Funding:

MG was supported by the National Institute for Health Research (NIHR) Biomedical Research Centre at Guy's and St Thomas' NHS Foundation Trust and King's College London. SA was supported by the Government of Saudi Arabia.

### Contributorship statement:

SA, AW and MG conceptualised and designed the study. SA and MG performed the paper search. SA and LM performed the coding. SA wrote the first draft and all authors have read and made improvements of the contents and the wording.

### Competing interests:

There are no competing interests.

### Data sharing statement:

No additional data are available.

## References

1. WHO. Cardiovascular diseases (CVDs). Accessed August, 2016  
<http://www.who.int/mediacentre/factsheets/fs317/en/>.
2. Poortinga W. The prevalence and clustering of four major lifestyle risk factors in an English adult population. *Preventive medicine* 2007;44(2):124-28.  
doi.org/10.1016/j.ypmed.2006.10.006.
3. Cairney J, Leatherdale ST, Faulkner GE. A longitudinal examination of the interrelationship of multiple health behaviors. *American journal of preventive medicine* 2014;47(3):283-89. doi.org/10.1016/j.amepre.2014.04.019.
4. Khaw K-T, Wareham N, Bingham S, et al. Combined impact of health behaviours and mortality in men and women: the EPIC-Norfolk prospective population study. *PLoS medicine* 2008;5(1):e12. doi.org/10.1371/journal.pmed.0050012.
5. Ebrahim S, Taylor F, Ward K, et al. Multiple risk factor interventions for primary prevention of coronary heart disease. *The Cochrane Library* 2011.  
doi.org/10.1002/14651858.CD001561.pub3.
6. Fleming P, Godwin M. Lifestyle interventions in primary care Systematic review of randomized controlled trials. *Canadian family physician* 2008;54(12):1706-13.
7. Álvarez-Bueno C, Cavero-Redondo I, Martínez-Andrés M, et al. Effectiveness of multifactorial interventions in primary health care settings for primary prevention of cardiovascular disease: a systematic review of systematic reviews. *Preventive medicine* 2015;76:S68-S75. doi.org/10.1016/j.ypmed.2014.11.028.
8. Krogsbøll LT, Jørgensen KJ, Larsen CG, et al. General health checks in adults for reducing morbidity and mortality from disease: Cochrane systematic review and meta-analysis. *BMJ* 2012;345:e7191. doi.org/10.1136/bmj.e7191.
9. Michie S, Richardson M, Johnston M, et al. The behavior change technique taxonomy (v1) of 93 hierarchically clustered techniques: building an international consensus for the reporting of behavior change interventions. *Annals of behavioral medicine* 2013;46(1):81-95. doi.org/10.1007/s12160-013-9486-6.
10. Campbell M, Fitzpatrick R, Haines A, et al. Framework for design and evaluation of complex interventions to improve health. *BMJ* 2000;321(7262):694-96.  
doi.org/10.1136/bmj.321.7262.694.
11. Michie S, Johnston M, Francis J, et al. From theory to intervention: mapping theoretically derived behavioural determinants to behaviour change techniques. *Applied psychology* 2008;57(4):660-80. doi.org/10.1111/j.1464-0597.2008.00341.x.
12. Webb T, Joseph J, Yardley L, et al. Using the internet to promote health behavior change: a systematic review and meta-analysis of the impact of theoretical basis, use of behavior change techniques, and mode of delivery on efficacy. *Journal of medical Internet research* 2010;12(1):e4. doi.org/10.2196/jmir.1376.

- 1  
2  
3 13. Prestwich A, Sniehotta FF, Whittington C, et al. Does theory influence the effectiveness  
4 of health behavior interventions? Meta-analysis. *Health Psychology* 2014;33(5):465.  
5 doi.org/10.1037/a0032853.  
6
- 7  
8 14. Prestwich A, Webb TL, Conner M. Using theory to develop and test interventions to  
9 promote changes in health behaviour: evidence, issues, and recommendations.  
10 *Current Opinion in Psychology* 2015;5:1-5. doi.org/10.1016/j.copsyc.2015.02.011.  
11
- 12 15. Michie S, Atkins L, West R. The behaviour change wheel: a guide to designing  
13 interventions. Great Britain: Silverback Publishing 2015.  
14
- 15 16. Michie S, Fixsen D, Grimshaw JM, et al. Specifying and reporting complex behaviour  
16 change interventions: the need for a scientific method. *Implement Sci* 2009;4(40):1-6.  
17 doi.org/10.1186/1748-5908-4-40.  
18
- 19 17. Dombrowski SU, Sniehotta FF, Avenell A, et al. Identifying active ingredients in complex  
20 behavioural interventions for obese adults with obesity-related co-morbidities or  
21 additional risk factors for co-morbidities: a systematic review. *Health Psychology  
22 Review* 2012;6(1):7-32. doi.org/10.1080/17437199.2010.513298.  
23 doi.org/10.1080/17437199.2010.513298.  
24
- 25 18. Michie S, Abraham C, Whittington C, et al. Effective techniques in healthy eating and  
26 physical activity interventions: a meta-regression. *Health Psychology* 2009;28(6):690.  
27 doi.org/10.1037/a0016136.  
28
- 29 19. Higgins JP, Altman DG, Gøtzsche PC, et al. The Cochrane Collaboration's tool for  
30 assessing risk of bias in randomised trials. *BMJ* 2011;343.  
31 doi.org/10.1136/bmj.d5928.  
32
- 33 20. Michie S, Prestwich A. Are interventions theory-based? Development of a theory coding  
34 scheme. *Health Psychology* 2010;29(1):1. doi.org/10.1037/a0016939.  
35
- 36 21. Bishop FL, Fenge-Davies AL, Kirby S, et al. Context effects and behaviour change  
37 techniques in randomised trials: A systematic review using the example of trials to  
38 increase adherence to physical activity in musculoskeletal pain. *Psychology & health*  
39 2015;30(1):104-21. doi.org/10.1080/08870446.2014.953529.  
40
- 41 22. DerSimonian R, Laird N. Meta-analysis in clinical trials. *Controlled clinical trials*  
42 1986;7(3):177-88.  
43
- 44 23. Egger M, Smith GD, Schneider M, et al. Bias in meta-analysis detected by a simple,  
45 graphical test. *BMJ* 1997;315(7109):629-34.  
46
- 47 24. Duval S, Tweedie R. A nonparametric "trim and fill" method of accounting for publication  
48 bias in meta-analysis. *Journal of the American Statistical Association*  
49 2000;95(449):89-98.  
50
- 51 25. Mendis S, Johnston SC, Fan W, et al. Cardiovascular risk management and its impact  
52 on hypertension control in primary care in low-resource settings: a cluster-  
53 randomized trial. *Bulletin of the World Health Organization* 2010;88(6):412-19.  
54  
55  
56  
57  
58  
59  
60

- 1  
2  
3 26. Lakerveld J, Bot SD, Chinapaw MJ, et al. Motivational interviewing and problem solving  
4 treatment to reduce type 2 diabetes and cardiovascular disease risk in real life: a  
5 randomized controlled trial. *Int J Behav Nutr Phys Act* 2013;10(47):10.1186.  
6 doi.org/10.1186/1479-5868-10-47.  
7
- 8 27. Hardcastle SJ, Taylor AH, Bailey MP, et al. Effectiveness of a motivational interviewing  
9 intervention on weight loss, physical activity and cardiovascular disease risk factors:  
10 a randomised controlled trial with a 12-month post-intervention follow-up. *Int J Behav*  
11 *Nutr Phys Act* 2013;10(40):1-16. doi.org/10.1186/1479-5868-10-40.  
12
- 13 28. Parra-Medina D, Wilcox S, Salinas J, et al. Results of the Heart Healthy and Ethnically  
14 Relevant Lifestyle trial: a cardiovascular risk reduction intervention for African  
15 American women attending community health centers. *American journal of public*  
16 *health* 2011;101(10):1914-21. doi.org/ 10.2105/AJPH.2011.300151.  
17
- 18 29. Harting J, van Assema P, van Limpt P, et al. Cardiovascular prevention in the Hartslag  
19 Limburg project: effects of a high-risk approach on behavioral risk factors in a general  
20 practice population. *Preventive medicine* 2006;43(5):372-78.  
21 doi.org/10.1016/j.ypmed.2006.06.016.  
22
- 23 30. OXCHECK. Effectiveness of health checks conducted by nurses in primary care: final  
24 results of the OXCHECK study. *BMJ* 1995;1099-104.  
25 doi.org/10.1136/bmj.310.6987.1099.  
26
- 27 31. Knutsen SF, Knutsen R. The Tromsø Survey: the Family Intervention study—the effect  
28 of intervention on some coronary risk factors and dietary habits, a 6-year follow-up.  
29 *Preventive medicine* 1991;20(2):197-212. doi.org/10.1016/0091-7435(91)90020-5.  
30
- 31 32. Meland E, Lærum E, Ulvik RJ. Effectiveness of two preventive interventions for coronary  
32 heart disease in primary care. *Scandinavian journal of primary health care*  
33 1997;15(1):57-63. doi.org/10.3109/02813439709043432.  
34
- 35 33. Sartorelli DS, Sciarra EC, Franco LJ, et al. Beneficial effects of short-term nutritional  
36 counselling at the primary health-care level among Brazilian adults. *Public health*  
37 *nutrition* 2005;8(07):820-25. doi.org/10.1079/PHN2005737  
38
- 39 34. Koelewijn-van Loon MS, van der Weijden T, van Steenkiste B, et al. Involving patients in  
40 cardiovascular risk management with nurse-led clinics: a cluster randomized  
41 controlled trial. *Canadian Medical Association Journal* 2009;181(12):E267-E74.  
42 doi.org/10.1503/cmaj.081591.  
43
- 44 35. Brett T, Arnold-Reed D, Phan C, et al. The Fremantle Primary Prevention Study: a  
45 multicentre randomised trial of absolute cardiovascular risk reduction. *Br J Gen Pract*  
46 2012;62(594):e22-e28. doi.org/ 10.3399/bjgp12X616337.  
47
- 48 36. Steptoe A, Day S, Doherty S, et al. Behavioural counselling in general practice for the  
49 promotion of healthy behaviour among adults at increased risk of coronary heart  
50 disease: randomised trial  
51 Commentary: Treatment allocation by the method of  
52 minimisation. *BMJ* 1999;319(7215):943-48.  
53
- 54 37. Eriksson MK, Franks PW, Eliasson M. A 3-year randomized trial of lifestyle intervention  
55 for cardiovascular risk reduction in the primary care setting: the Swedish Björknäs  
56 study. *PLoS one* 2009;4(4):e5195. doi.org/10.1371/journal.pone.0005195.  
57  
58  
59  
60

- 1  
2  
3 38. Ma J, Berra K, Haskell WL, et al. Case management to reduce risk of cardiovascular  
4 disease in a county health care system. *Archives of internal medicine*  
5 2009;169(21):1988-95. doi.org//10.1001\_archinternmed.2009.381.  
6
- 7 39. Tiessen AH, Smit AJ, Broer J, et al. Randomized controlled trial on cardiovascular risk  
8 management by practice nurses supported by self-monitoring in primary care. *BMC*  
9 *family practice* 2012;13(1):1. doi.org//10.1186/1471-2296-13-90.  
10
- 11  
12 40. Drevenhorn E, Bengtson A, Nilsson PM, et al. Consultation training of nurses for  
13 cardiovascular prevention—a randomized study of 2 years duration. *Blood pressure*  
14 2012;21(5):293-99.  
15
- 16 41. Wennehorst K, Mildenstein K, Saliger B, et al. A comprehensive lifestyle intervention to  
17 prevent type 2 diabetes and cardiovascular diseases: The german chip trial.  
18 *Prevention Science* 2016.  
19
- 20 42. Gomez-Huelgas R, Jansen-Chaparro S, Baca-Osorio A, et al. Effects of a long-term  
21 lifestyle intervention program with Mediterranean diet and exercise for the  
22 management of patients with metabolic syndrome in a primary care setting.  
23 *European journal of internal medicine* 2015;26(5):317-23.  
24
- 25 43. Duncan S, Goodyear-Smith F, McPhee J, et al. Family-centered brief intervention for  
26 reducing obesity and cardiovascular disease risk: A randomized controlled trial.  
27 *Obesity* 2016;24(11):2311-18.  
28
- 29 44. Salisbury C, O’Cathain A, Thomas C, et al. Telehealth for patients at high risk of  
30 cardiovascular disease: pragmatic randomised controlled trial. *BMJ* 2016;353:i2647.  
31
- 32 45. Baron JA, Gleason R, Crowe B, et al. Preliminary trial of the effect of general practice  
33 based nutritional advice. *Br J Gen Pract* 1990;40(333):137-41.  
34
- 35 46. Kranjčević K, Marković BB, Lalić DI, et al. Is a targeted and planned GP intervention  
36 effective in cardiovascular disease prevention? A randomized controlled trial. *Medical*  
37 *science monitor: international medical journal of experimental and clinical research*  
38 2014;20:1180. doi.org/10.12659/MSM.890242.  
39
- 40 47. Harris MF, Fanaian M, Jayasinghe UW, et al. A cluster randomised controlled trial of  
41 vascular risk factor management in general practice. *Med J Aust* 2012;197(7):387-  
42 93. doi.org/10.5694/mja12.10313.  
43
- 44 48. Korhonen M, Kastarinen M, Uusitupa M, et al. The effect of intensified diet counseling on  
45 the diet of hypertensive subjects in primary health care: a 2-year open randomized  
46 controlled trial of lifestyle intervention against hypertension in eastern Finland.  
47 *Preventive medicine* 2003;36(1):8-16. doi.org/10.1006/pmed.2002.1120.  
48
- 49 49. Nilsson PM, Lindholm LH, Scherstén BF. Life style changes improve insulin resistance in  
50 hyperinsulinaemic subjects: a one-year intervention study of hypertensives and  
51 normotensives in Dalby. *Journal of hypertension* 1992;10(9):1071-78.  
52
- 53 50. Avram C, Iurciuc M, Craciun L, et al. Dietary and physical activity counseling in high-risk  
54 asymptomatic patients with metabolic syndrome—A primary care intervention. *Journal*  
55 *of Food, Agriculture & Environment* 2011;9(3&4):16-19.  
56  
57  
58  
59  
60

- 1  
2  
3 51. Lindholm LH, Ekblom T, Dash C, et al. The impact of health care advice given in primary  
4 care on cardiovascular risk. *BMJ* 1995;310(6987):1105-09.  
5  
6 52. Kannel WB, McGee D, Gordon T. A general cardiovascular risk profile: the Framingham  
7 Study. *The American journal of cardiology* 1976;38(1):46-51.  
8  
9 53. Wood D, Kinmonth A, Davies G, et al. Randomised controlled trial evaluating  
10 cardiovascular screening and intervention in general practice: principal results of  
11 British family heart study. *BMJ* 1994;308(6924):313-20.  
12 doi.org/10.1136/bmj.308.6924.313  
13  
14 54. Tunstall-Pedoe H. The Dundee coronary risk-disk for management of change in risk  
15 factors. *BMJ* 1991;303(6805):744-47.  
16  
17 55. Collins GS, Altman DG. Predicting the 10 year risk of cardiovascular disease in the  
18 United Kingdom: independent and external validation of an updated version of  
19 QRISK2. *BMJ* 2012;344:e4181.  
20  
21 56. Conroy R, Pyörälä K, Fitzgerald Ae, et al. Estimation of ten-year risk of fatal  
22 cardiovascular disease in Europe: the SCORE project. *European heart journal*  
23 2003;24(11):987-1003. [http://dx.doi.org/10.1016/S0195-668X\(03\)00114-3](http://dx.doi.org/10.1016/S0195-668X(03)00114-3).  
24  
25  
26 57. Prochaska JO, Norcross JC. Stages of change. *Psychotherapy: Theory, research,*  
27 *practice, training* 2001;38(4):443.  
28  
29 58. Bandura A. *Social foundations of thought and action: A social cognitive theory*: Prentice-  
30 Hall, Inc, 1986.  
31  
32 59. Vetter ML, Wadden TA, Chittams J, et al. Effect of lifestyle intervention on  
33 cardiometabolic risk factors: results of the POWER-UP trial. *International Journal of*  
34 *Obesity* 2013;37:S19-S24. doi.org/10.1038/ijo.2013.92.  
35  
36 60. Booth HP, Prevost TA, Wright AJ, et al. Effectiveness of behavioural weight loss  
37 interventions delivered in a primary care setting: a systematic review and meta-  
38 analysis. *Family practice* 2014;31(6):643-53. doi.org/10.1093/fampra/cmu064.  
39  
40 61. Trialists CT. Efficacy and safety of cholesterol-lowering treatment: prospective meta-  
41 analysis of data from 90 056 participants in 14 randomised trials of statins. *The*  
42 *Lancet* 2005;366(9493):1267-78. doi.org/10.1016/S0140-6736(05)67394-1.  
43  
44 62. Taylor F, Huffman MD, Macedo AF, et al. Statins for the primary prevention of  
45 cardiovascular disease. *The Cochrane Library* 2013.  
46 doi.org/10.1002/14651858.CD004816.pub4.  
47  
48 63. Oldridge NB, Guyatt GH, Fischer ME, et al. Cardiac rehabilitation after myocardial  
49 infarction: combined experience of randomized clinical trials. *JAMA* 1988;260(7):945-  
50 50. doi.org/10.1001/jama.1988.03410070073031.  
51  
52 64. Taylor RS, Brown A, Ebrahim S, et al. Exercise-based rehabilitation for patients with  
53 coronary heart disease: systematic review and meta-analysis of randomized  
54 controlled trials. *The American journal of medicine* 2004;116(10):682-92.  
55 doi.org/10.1016/j.amjmed.2004.01.009.  
56  
57  
58  
59  
60

- 1  
2  
3 65. Mullen PD, Mains DA, Velez R. A meta-analysis of controlled trials of cardiac patient  
4 education. *Patient education and counseling* 1992;19(2):143-62.  
5 .doi.org/10.1016/0738-3991(92)90194-N.  
6
- 7 66. Hoffmann TC, Glasziou PP, Boutron I, et al. Better reporting of interventions: template  
8 for intervention description and replication (TIDieR) checklist and guide. *BMJ*  
9 2014;348:g1687. doi.org/10.1136/bmj.g1687.  
10
- 11 67. Michie S, Jochelson K, Markham WA, et al. Low income groups and behaviour change  
12 interventions: a review of intervention content, effectiveness and theoretical  
13 frameworks. *Journal of Epidemiology and Community Health* 2009;jech.  
14 2008.078725. doi.org/10.1136/jech.2008.078725.  
15
- 16 68. Jackson D, Bowden J, Baker R. How does the DerSimonian and Laird procedure for  
17 random effects meta-analysis compare with its more efficient but harder to compute  
18 counterparts? *Journal of Statistical Planning and Inference* 2010;140(4):961-70.  
19
- 20 69. Cornell JE, Mulrow CD, Localio R, et al. Random-effects meta-analysis of inconsistent  
21 effects: a time for change. *Annals of internal medicine* 2014;160(4):267-70.  
22
- 23 70. Thorlund K, Wetterslev J, Awad T, et al. Comparison of statistical inferences from the  
24 DerSimonian–Laird and alternative random-effects model meta-analyses—an  
25 empirical assessment of 920 Cochrane primary outcome meta-analyses. *Research*  
26 *synthesis methods* 2011;2(4):238-53.  
27
- 28 71. Bland JM, Altman DG. Multiple significance tests: the Bonferroni method. *BMJ*  
29 1995;310(6973):170. doi.org/10.1136/bmj.310.6973.170.  
30
- 31 72. Feise RJ. Do multiple outcome measures require p-value adjustment? *BMC medical*  
32 *research methodology* 2002;2(1):8.  
33
- 34 73. Rothman KJ, Greenland S, Lash TL. *Modern epidemiology*. Lippincott Williams &  
35 Wilkins, 2008.  
36  
37  
38  
39  
40  
41  
42  
43  
44  
45  
46  
47  
48  
49  
50  
51  
52  
53  
54  
55  
56  
57  
58  
59  
60

1  
2  
3  
4  
5  
6  
7  
8  
9  
10  
11  
12  
13  
14  
15  
16  
17  
18  
19  
20  
21  
22  
23  
24  
25  
26  
27  
28  
29  
30  
31  
32  
33  
34  
35  
36  
37  
38  
39  
40  
41  
42  
43  
44  
45  
46  
47  
48  
49  
50  
51  
52  
53  
54  
55  
56  
57  
58  
59  
60

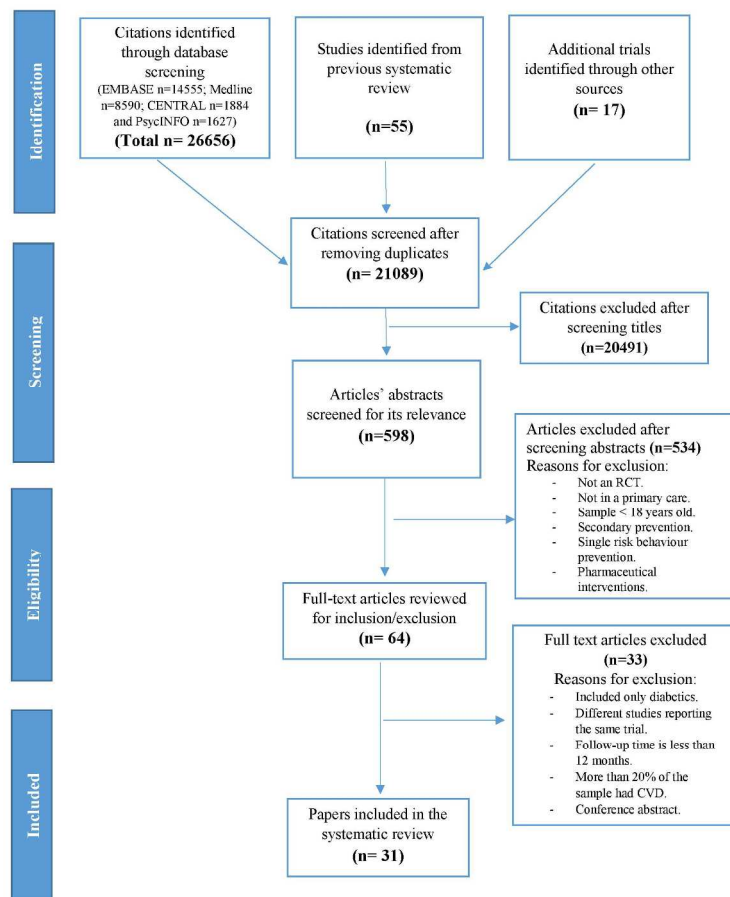

Figure 1: PRISMA flow diagram outlining the systematic review processes.

Figure 1: PRISMA flow diagram outlining the systematic review processes.

210x297mm (300 x 300 DPI)



## Appendix A

### Search strategy

#### CENTRAL search strategy

| ID  | Search Hits                                                       |      |
|-----|-------------------------------------------------------------------|------|
| #1  | MeSH descriptor CARDIOVASCULAR DISEASES this term only            | 480  |
| #2  | MeSH descriptor CORONARY DISEASE explode all trees                | 356  |
| #3  | cardiovascular in All Text                                        | 2052 |
| #4  | (coronary in All Text near/3 disease* in All Text)                | 9    |
| #5  | (heart in All Text near/3 disease* in All Text)                   | 11   |
| #6  | MeSH descriptor HYPERTENSION this term only                       | 643  |
| #7  | hypertension in All Text                                          | 1781 |
| #8  | (atherosclerosis in All Text or arteriosclerosis in All Text)     | 258  |
| #9  | (hyperlipidaemia in All Text or hyperlipidemia in All Text)       | 224  |
| #10 | MeSH descriptor ARTERIOSCLEROSIS explode all trees                | 79   |
| #11 | MeSH descriptor CHOLESTEROL explode trees all trees               | 209  |
| #12 | MeSH descriptor HYPERLIPIDEMIA explode all trees                  | 33   |
| #13 | cholesterol in All Text                                           | 630  |
| #14 | multiple next risk next factor* in All Text                       | 51   |
| #15 | coronary next risk next factor* in All Text                       | 30   |
| #16 | (#1 or #2 or #3 or #4 or #5 or #6 or #7 or #8 or #9 or #10)       | 3105 |
| #17 | (#11 or #12 or #13 or #14 or #15)                                 | 682  |
| #18 | (#16 or #17)                                                      | 3234 |
| #19 | MeSH descriptor HEALTH EDUCATION explode all trees                | 630  |
| #20 | MeSH descriptor HEALTH PROMOTION explode all trees                | 191  |
| #21 | MeSH descriptor HEALTH BEHAVIOR explode all trees                 | 215  |
| #22 | MeSH descriptor PRIMARY PREVENTION this term only                 | 1021 |
| #23 | MeSH descriptor COUNSELLING this term only                        | 237  |
| #24 | counsel* in All Text                                              | 1186 |
| #25 | (health in All Text near/3 educat* in All Text)                   | 31   |
| #26 | (patient in All Text near/3 educat* in All Text)                  | 20   |
| #27 | (education* in All Text near/3 program* in All Text)              | 23   |
| #28 | (health in All Text near/3 promotion* in All Text)                | 2    |
| #29 | (health in All Text near/3 behaviour* in All Text)                | 11   |
| #30 | (health in All Text near/3 behavior* in All Text)                 | 9    |
| #31 | primary next prevention in All Text                               | 379  |
| #32 | (multiple next risk in All Text near/3 intervention* in All Text) | 6    |
| #33 | (multifactor* in All Text near/3 intervention* in All Text)       | 9    |
| #34 | (multifactor* in All Text near/3 prevention in All Text)          | 1    |
| #35 | (risk next factor* in All Text near/3 reduc* in All Text)         | 10   |
| #36 | (risk next factor* in All Text near/3 manag* in All Text)         | 20   |
| #37 | (risk next factor* in All Text near/3 intervent* in All Text)     | 49   |

|    |             |                                                                                      |
|----|-------------|--------------------------------------------------------------------------------------|
| 1  |             |                                                                                      |
| 2  |             |                                                                                      |
| 3  | #38         | (lifestyle in All Text near/3 intervention* in All Text) 34                          |
| 4  | #39         | (lifestyle in All Text near/3 advice in All Text) 6                                  |
| 5  | #40         | (life-style in All Text near/3 intervention* in All Text) 12                         |
| 6  | #41         | (life-style in All Text near/3 advice in All Text) 2                                 |
| 7  | #42         | (life-style in All Text near/3 alter* in All Text) 1                                 |
| 8  | #43         | (lifestyle in All Text near/3 alter* in All Text) 5                                  |
| 9  | #44         | (lifestyle in All Text near/3 educat* in All Text) 15                                |
| 10 | #45         | (life-style in All Text near/3 educat* in All Text) 5                                |
| 11 | #46         | (life-style in All Text near/3 chang* in All Text) 8                                 |
| 12 | #47         | (lifestyle in All Text near/3 chang* in All Text) 18                                 |
| 13 | #48         | (behavior* in All Text near/3 chang* in All Text) 24                                 |
| 14 | #49         | (behaviour* in All Text near/3 chang* in All Text) 37                                |
| 15 | #50         | (health next care in All Text near/3 advice in All Text) 7                           |
| 16 | #51         | (healthcare in All Text near/3 advice in All Text) 8                                 |
| 17 | #52         | nonpharmacologic* in All Text 46                                                     |
| 18 | #53         | non-pharmacologic* in All Text 562                                                   |
| 19 | #54         | (#19 or #20 or #21 or #22 or #23 or #24 or #25 or #26 or #27 or #28 or #29)          |
| 20 |             | 2311                                                                                 |
| 21 | #55         | (#30 or #31 or #32 or #33 or #34 or #35 or #36 or #37 or #38 or #39) 451             |
| 22 | #56         | (#40 or #41 or #42 or #43 or #44 or #45 or #46 or #47 or #48 or #49 or #50 or #51 or |
| 23 | #52 or #53) | 646                                                                                  |
| 24 | #57         | (#54 or #55 or #56) 2915                                                             |
| 25 | #58         | (#18 and #57) 1293                                                                   |
| 26 |             |                                                                                      |
| 27 |             |                                                                                      |
| 28 |             |                                                                                      |
| 29 |             |                                                                                      |
| 30 |             |                                                                                      |
| 31 |             |                                                                                      |
| 32 |             |                                                                                      |
| 33 |             |                                                                                      |
| 34 |             |                                                                                      |
| 35 |             |                                                                                      |

### Embase search strategy

1. cardiovascular disease/
2. exp ischemic heart disease/
3. (Coronary adj3 disease\$.tw.
4. heart disease\$.tw.
5. Hypertension/
6. hypertension.tw.
7. (cardiovascular adj3 (disease\$ or fit of fitness)).tw.
8. exp arteriosclerosis/
9. exp hyperlipidemia/
10. hyperlipid?emia.tw.
11. cholesterol.tw.
12. arteriosclero\$.tw.
13. atherosclero\$.tw.
14. coronary risk factor\$.tw.
15. multiple risk factor\$.tw.
16. cardiovascular risk factor\$.tw.
17. or/1-16
18. exp health education/
19. exp health behavior/

20. primary prevention/
21. exp counseling/
22. (multifactor\$ adj5 (intervent\$ or prevent\$)).tw.
23. ((life-style or life style or lifestyle or healthcare or health care) adj3 (intervention\$ or educat\$ or advice or alter\$ or change\$)).tw.
24. primary prevention.tw.
25. (risk factor\$ adj3 (reduc\$ or manage\$ or managing or intervent\$ or program\$)).tw.
26. (educat\$ adj3 (program\$ or patient\$)).tw.
27. (non pharmacologic\$ or nonpharmacologic\$).tw.
28. (risk factor\$ adj3 modif\$).tw.
29. ((lifestyle or life-style or life style) adj3 modif\$).tw.
30. exp behavior therapy/
31. (behavi?r\$ adj3 (intervention\$ or program\$ or modif\$ or change\$ or alter\$)).tw.
32. (promot\$ adj3 (health or healthcare or health care)).tw.
33. or/18-32
34. 17 and 33
35. random\$.ti,ab.
36. factorial\$.ti,ab.
37. (crossover\$ or cross over\$ or cross-over\$).ti,ab.
38. placebo\$.ti,ab.
39. (double\$ adj blind\$).ti,ab.
40. (singl\$ adj blind\$).ti,ab.
41. assign\$.ti,ab.
42. allocat\$.ti,ab.
43. volunteer\$.ti,ab.
44. Crossover Procedure/
45. Double Blind Procedure/
46. Randomized Controlled Trial/
47. Single Blind Procedure/
48. or/35-47
49. exp animal/
50. nonhuman/
51. exp animal experiment/
52. or/49-51
53. exp human/
54. 52 not 53
55. 48 not 54
56. 55 and 34
57. limit 56 to yr="2006 -Current"

### Medline search strategy

1. Cardiovascular Diseases/
2. exp coronary disease/
3. Hypertension/

- 1
- 2
- 3
4. exp Arteriosclerosis/
5. exp Hyperlipidemia/
6. (cardiovascular adj3 disease\$.tw.
7. (cardiovascular adj3 (fit or fitness)).tw.
8. (Coronary adj3 disease\$.tw.
9. heart disease\$.tw.
10. hypertension.tw.
11. hyperlipid?emia.tw.
12. cholesterol.tw.
13. atherosclerosis.tw.
14. arteriosclerosis.tw.
15. coronary risk factor\$.tw.
16. multiple risk factor\$.tw.
17. cardiovascular risk factor\$.tw.
18. or/1-17
19. health promotion/
20. exp health education/
21. exp health behavior/
22. exp counseling/
23. Primary Prevention/
24. (multifactor\$ adj5 (intervent\$ or prevent\$)).tw.
25. ((lifestyle or life-style) adj3 (intervention\$ or educat\$ or advice\$ or alter\$ or change\$)).tw.
26. ((lifestye or life-style or behavior?r\$) adj3 (intervention\$ or educat\$ or advice\$ or alter\$ or change\$)).tw.
27. ((healthcare or health care) adj3 advice).tw.
28. primary prevention.tw.
29. (risk factor\$ adj3 (reduc\$ or manage\$ or managing or intervent\$ or program\$)).tw.
30. (educat\$ adj3 (program\$ or patient\$)).tw.
31. ((health or healthcare or health care) adj3 (educat\$ or advice or promot\$)).tw.
32. (nonpharmacologic\$ or non-pharmacologic\$).tw.
33. ((lifestyle or life style or life-style or behavio?r\$ or risk factor\$) adj3 modif\$).tw.
34. or/19-33
35. 18 and 34
36. randomized controlled trial.pt.
37. controlled clinical trial.pt.
38. Randomized controlled trials/
39. random allocation.sh.
40. double blind method.sh.
41. single-blind method.sh.
42. or/36-41
43. clinical trial.pt.
44. exp Clinical trial/
45. (clin\$ adj25 trial\$.ti,ab.

1  
2  
3 46. ((singl\$ or doubl\$ or trebl\$ or tripl\$) adj (blind\$ or mask\$)).ti,ab.

4 47. placebos.sh.

5 48. placebo\$.ti,ab.

6 49. random\$.ti,ab.

7 50. research design.sh.

8 51. or/43-50

9 52. exp animal/ not humans/

10 53. 42 or 51

11 54. 53 not 52

12 55. 54 and 35

13 **PsycINFO search strategy:**

14 1. cardiovascular disease.mp.

15 2. hypertension.mp.

16 3. (Coronary adj3 disease\$.mp.

17 4. heart disease\$.mp.

18 5. (cardiovascular adj3 (disease\$ or fit of fitness)).mp. [mp=title, abstract, heading word,  
19 table of contents, key concepts, original title, tests & measures]

20 6. exp Arteriosclerosis/

21 7. hyperlipid?emia.mp.

22 8. cholesterol.mp.

23 9. arteriosclero\$.mp.

24 10. atherosclero\$.mp.

25 11. coronary risk factor\$.mp.

26 12. multiple risk factor\$.mp.

27 13. cardiovascular risk factor\$.mp.

28 14. or/1-13

29 15. exp health education/

30 16. exp health education/

31 17. exp health promotion/

32 18. exp preventive medicine/

33 19. exp counseling/

34 20. primary prevention.mp.

35 21. (multifactor\$ adj5 (intervent\$ or prevent\$)).mp.

36 22. behavior change.mp.

37 23. exp Obesity/ or exp Food Intake/ or diet intervention.mp. or exp Weight Loss/ or exp  
38 Diets/ or exp Overweight/ or exp Weight Control/ or exp Nutrition/

39 24. exp Nicotine/ or exp Tobacco Smoking/ or exp Smoking Cessation/ or cigarette.mp. or  
40 exp Drug Dependency/

41 25. exp Alcohol Drinking Patterns/ or exp Drinking Behavior/ or exp Alcohol Drinking  
42 Attitudes/ or exp Binge Drinking/ or drinking.mp.

43 26. exp Physical Activity/ or exp Intervention/ or exp Exercise/ or exp Physical Fitness/ or  
44 exp Motor Performance/ or physical training.mp.

45 27. 23 and 24

46 28. 23 and 25

- 1
- 2
- 3 29. 23 and 26
- 4 30. 24 and 25
- 5 31. 24 and 26
- 6 32. 25 and 26
- 7
- 8
- 9 33. ((life-style or life style or lifestyle or healthcare or health care) adj3 (intervention\$ or
- 10 educat\$ or advice or alter\$ or change\$)).mp.
- 11 34. primary prevention.mp.
- 12 35. (risk factor\$ adj3 (reduc\$ or manage\$ or managing or intervent\$ or program\$)).sh.
- 13 36. (educat\$ adj3 (program\$ or patient\$)).mp.
- 14 37. (non pharmacologic\$ or nonpharmacologic\$).mp.
- 15 38. (risk factor\$ adj3 modif\$).mp.
- 16 39. ((lifestyle or life-style or life style) adj3 modif\$).mp.
- 17 40. (behavi?r\$ adj3 (intervention\$ or program\$ or modif\$ or change\$ or alter\$)).mp.
- 18 41. (promot\$ adj3 (health or healthcare or health care)).mp.
- 19 42. 15 or 16 or 17 or 18 or 19 or 20 or 21 or 22 or 27 or 28 or 29 or 30 or 31 or 32 or 33 or 34
- 20 or 35 or 36 or 37 or 38 or 39 or 40 or 41
- 21 43. 14 and 42
- 22 44. random\$.ti,ab.
- 23 45. factorial\$.ti,ab.
- 24 46. (crossover\$ or cross over\$ or cross-over\$).ti,ab.
- 25 47. placebo\$.ti,ab.
- 26 48. (double\$ adj blind\$).ti,ab.
- 27 49. (singl\$ adj blind\$).ti,ab.
- 28 50. assign\$.ti,ab.
- 29 51. allocat\$.ti,ab.
- 30 52. volunteer\$.ti,ab.
- 31 53. ("double-blind" or "random\* assigned" or control).mp.
- 32 54. treatment effectiveness evaluation.mp.
- 33 55. treatment outcome clinical trial\$.mp.
- 34 56. (controlled trial\$ and clinical trial\$).mp. [mp=title, abstract, heading word, table of
- 35 contents, key concepts, original title, tests & measures]
- 36 57. 44 or 45 or 46 or 47 or 48 or 49 or 50 or 51 or 52 or 53 or 54 or 55 or 56
- 37 58. 43 and 57
- 38
- 39
- 40
- 41
- 42
- 43
- 44
- 45
- 46
- 47
- 48
- 49
- 50
- 51
- 52
- 53
- 54
- 55
- 56
- 57
- 58
- 59
- 60

Appendix B

Forest plots of pooled effect of multiple behaviour interventions on intervention outcomes.

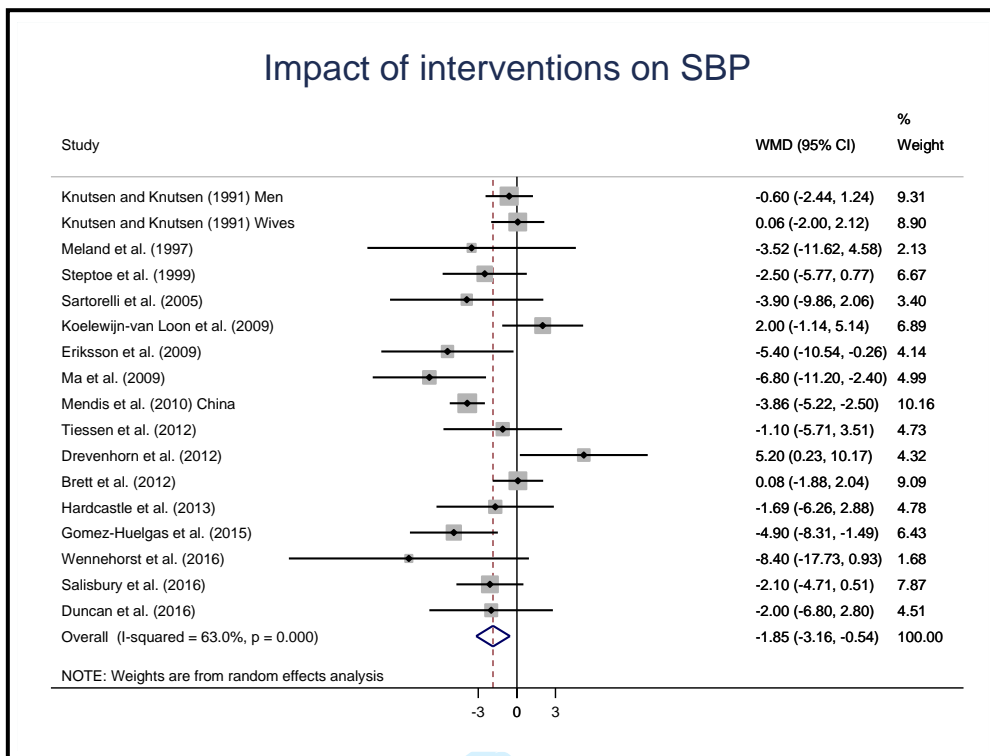

Pooled effect of multiple behaviour interventions on systolic blood pressure (mmHg). Random effects model used. MWD= mean weighted difference. 95% CI = 95% confidence intervals.

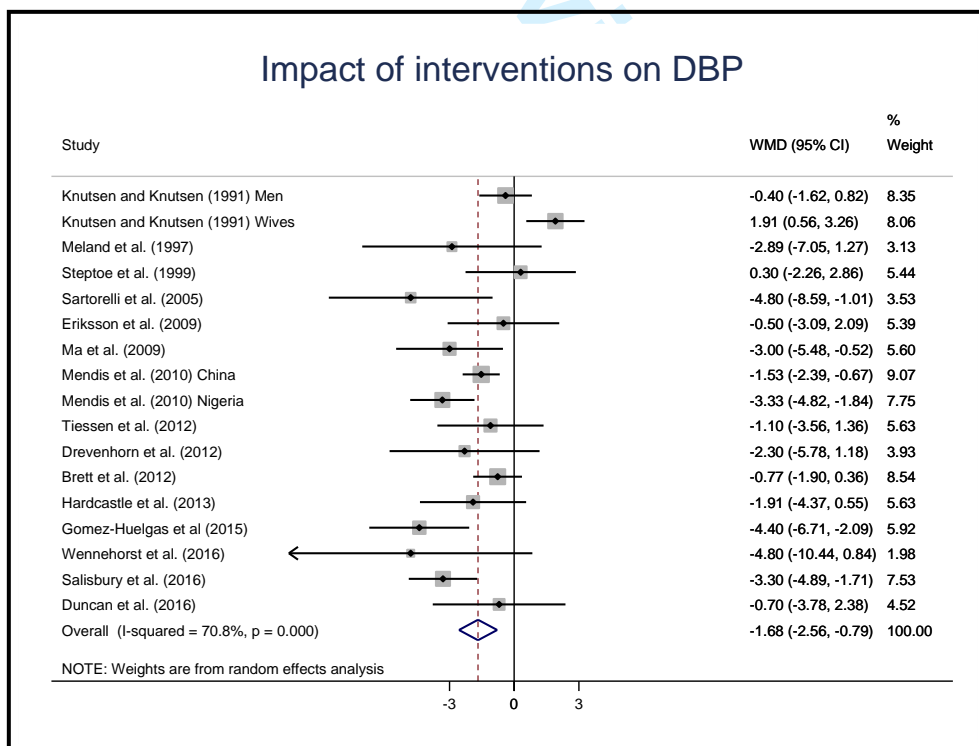

Pooled effect of multiple behaviour interventions on diastolic blood pressure (mmHg). Random effects model used. MWD= mean weighted difference. 95% CI = 95% confidence intervals.

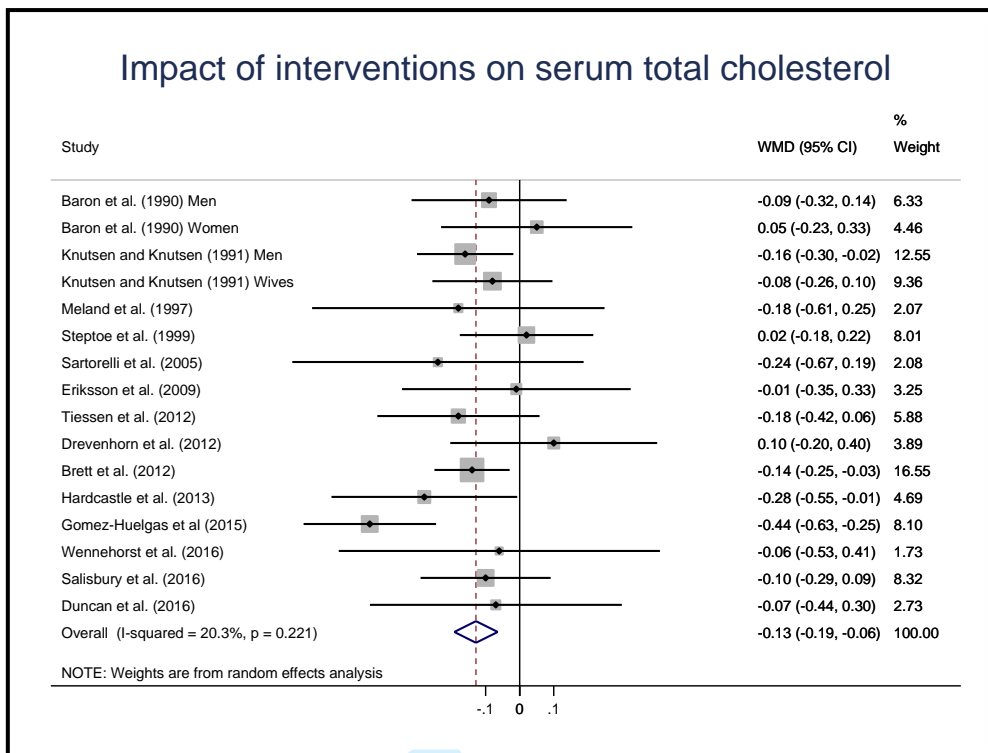

Pooled effect of multiple behaviour interventions on serum total cholesterol (mmol/L). Random effects model used. MWD= mean weighted difference. 95% CI = 95% confidence intervals.

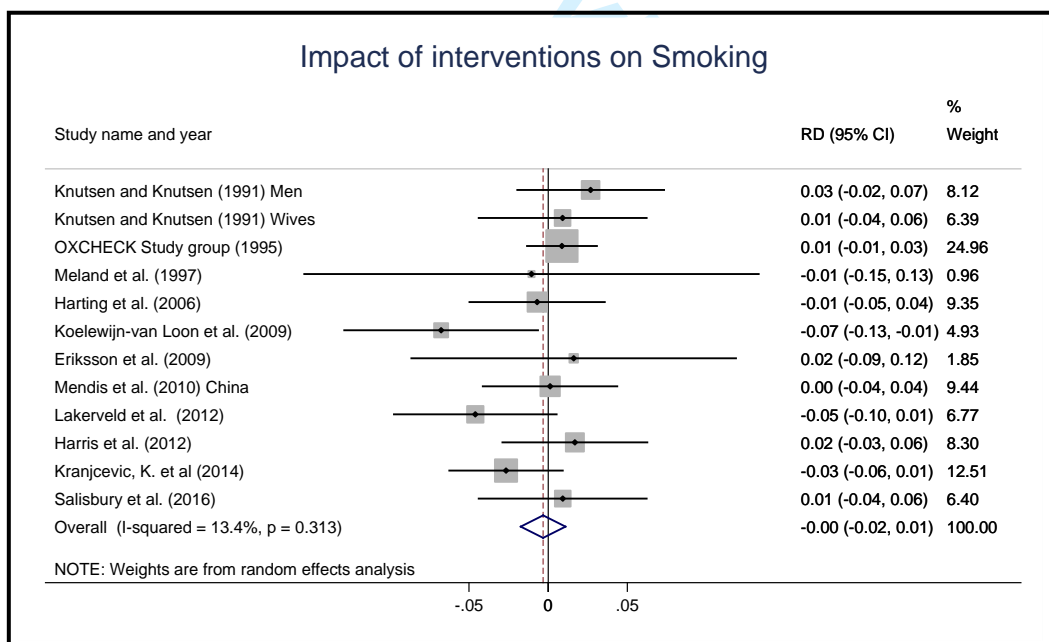

Pooled effect of multiple behaviour interventions on smoking prevalence. Random effects models used. RD= risk difference. 95% CI = 95% confidence intervals.



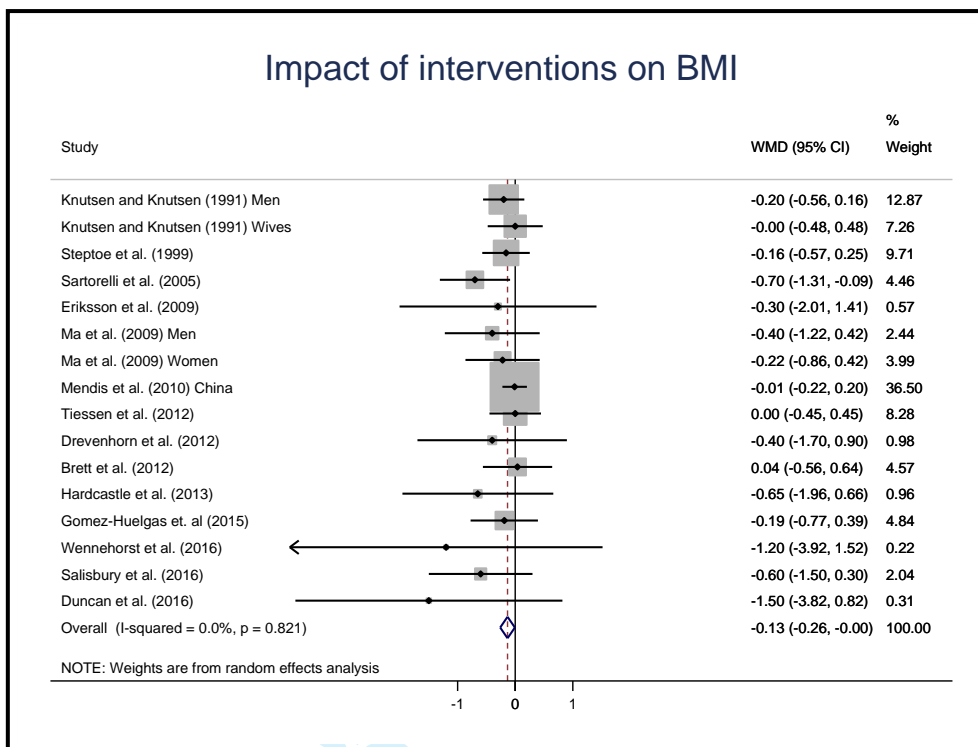

Pooled effect of multiple behaviour interventions on body mass index ( $\text{Kg/m}^2$ ). Random effects model used. MWD= mean weighted difference. 95% CI = 95% confidence intervals.

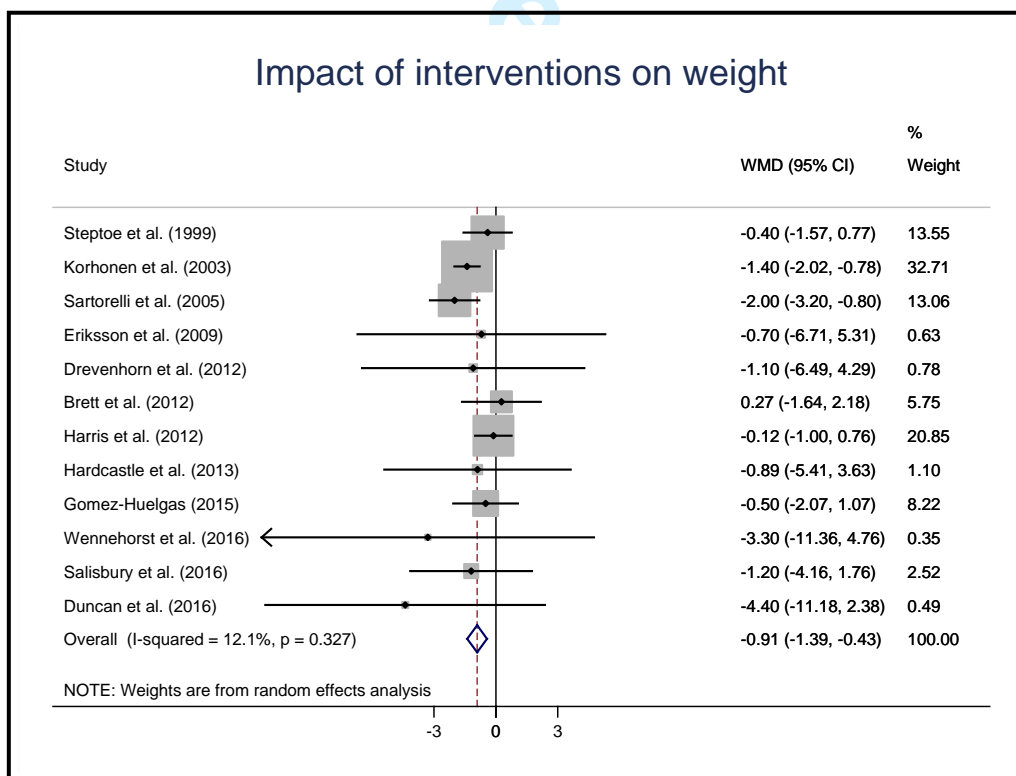

Pooled effect of multiple behaviour interventions on weight (Kg). Random effects model used. MWD= mean weighted difference. 95% CI = 95% confidence intervals.

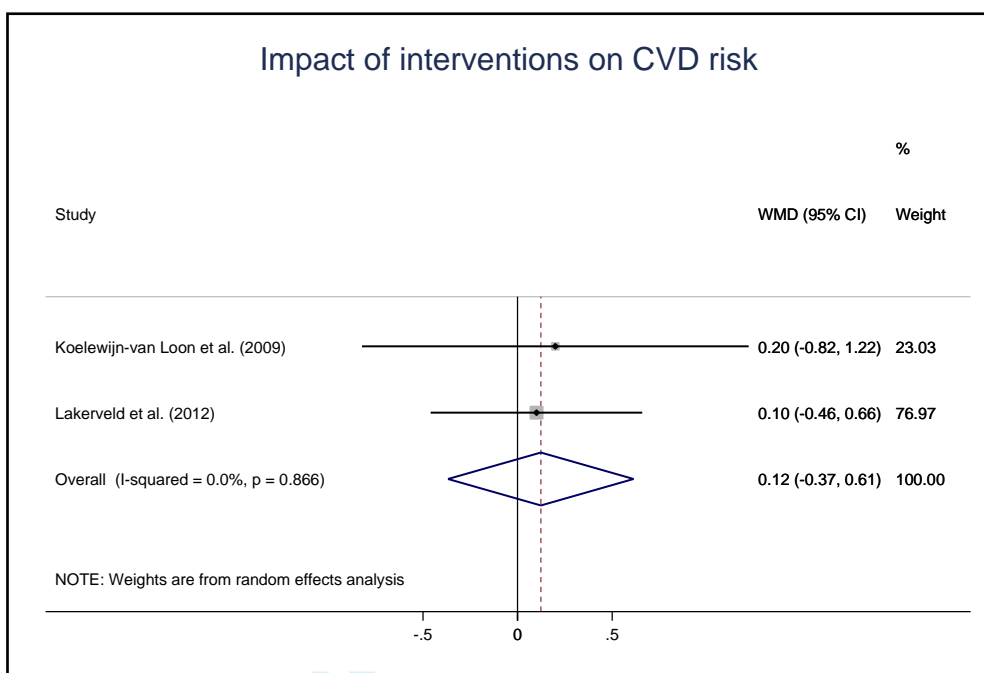

Pooled effect of multiple behaviour interventions on cardiovascular risk (SCORE). Random effect models used. MWD= mean weighted difference. 95% CI = 95% confidence intervals.

Preprint  
review only

Supplementary table 1: Trial characteristics of included studies.

| Study (Year)                            | Country          | Number of Participants | Selection criteria                                                                                                                                                                                                                  | Targeted behaviours                       | Follow-up duration | Intervention reported outcomes                                    |
|-----------------------------------------|------------------|------------------------|-------------------------------------------------------------------------------------------------------------------------------------------------------------------------------------------------------------------------------------|-------------------------------------------|--------------------|-------------------------------------------------------------------|
| Kranjčević, et al. <sup>1</sup>         | Croatia          | 1957                   | Men and women, aged ≥40.                                                                                                                                                                                                            | Diet and PA.                              | 18 months          | CVD-risk, weight, BP, cholesterol, smoking, alcohol and PA.       |
| Vetter, et al. <sup>2</sup>             | United States    | 390                    | Men and women, aged ≥21 years, BMI= 30-50kg/m <sup>2</sup> , elevated waist circumference.                                                                                                                                          | Diet and PA.                              | 2 years            | Weight, BP and cholesterol.                                       |
| Lakerveld, et al. <sup>3</sup>          | Netherlands      | 622                    | Men and women, aged: 30-50 years.                                                                                                                                                                                                   | Diet, PA and smoking.                     | 12 months          | CVD-risk, smoking, diet and PA.                                   |
| Hardcastle, et al. <sup>4</sup>         | United Kingdom   | 334                    | Men and women, aged 18-65 years and have at least one CVD risk factor.                                                                                                                                                              | Diet and PA.                              | 18 months          | Weight, BP, cholesterol, diet and PA.                             |
| Tiessen, et al. <sup>5</sup>            | Netherlands      | 201                    | Men aged: 50-75 years old and women aged: 55-75 years and CVD-risk (SCORE) ≥ 5%.                                                                                                                                                    | PA, diet and smoking.                     | 12 months          | CVD-risk, weight, BP, cholesterol, smoking and PA.                |
| Parra-Medina, et al. <sup>6</sup>       | United States    | 266                    | African-American women, aged ≥35 years, baseline BP <160/95.                                                                                                                                                                        | PA and diet.                              | 12 months          | Diet and PA.                                                      |
| Drevenhorn, et al. <sup>7</sup>         | Sweden           | 153                    | Hypertensive patients, men and women aged <75 years, elevated BP, BMI ≥ 25, serum cholesterol ≥ 6.5 and/or serum triglycerides ≥ 2.3 and not reporting regular PA.                                                                  | Smoking, alcohol, weight, PA and stress   | 2 years            | Weight, BP, cholesterol, alcohol and PA.                          |
| Brett, et al. <sup>8</sup>              | Australia        | 1200                   | Men and women aged 40-80 years, without a history of CVD.                                                                                                                                                                           | Diet, PA and smoking.                     | 12 months          | CVD-risk, weight, BP and cholesterol.                             |
| Harris, et al. <sup>9</sup>             | Australia        | 814                    | Men and women, aged 40-55 years with recorded diagnosis of hypertension and/or hyperlipidaemia or aged 56-64 years.                                                                                                                 | Diet, PA, smoking and alcohol.            | 12 months          | CVD-risk, weight, BP, cholesterol, smoking, alcohol, diet and PA. |
| Mendis, et al. <sup>10</sup>            | China<br>Nigeria | 1209<br>1188           | Men and women aged 30-70 years with SBP in the range (140-179 mmHg).                                                                                                                                                                | Smoking cessation, PA and diet.           | 12 months          | Weight, BP, smoking and diet.                                     |
| Koelwijn-van Loon, et al. <sup>11</sup> | Netherlands      | 615                    | One or more of the following: BP ≥ 140 or on treatment for high BP; total cholesterol ≥ 6.5 or on treatment for high cholesterol; smoker aged ≥ 50 years (men) or ≥ 55 years (women); diabetes; a family history of CVD; and obese. | Smoking status, diet, PA and alcohol use. | 12 months          | CVD-risk, BP, cholesterol, smoking, diet and PA.                  |
| Eriksson, et al. <sup>12</sup>          | Sweden           | 151                    | Men and women aged 18–65 years with hypertension, dyslipidaemia, type 2 diabetes or obesity.                                                                                                                                        | Diet and PA.                              | 3 years            | Weight, BP, cholesterol, smoking and PA.                          |
| Phelan, et al. <sup>13</sup>            | United States    | 224                    | Men and women aged 18–65 years and BMI of 30–45 kg/m <sup>2</sup> .                                                                                                                                                                 | Diet and PA.                              | 12 months          | Weight, BP, cholesterol and diet.                                 |

|                                          |                |                      |                                                                                                                           |                                                                          |           |                                                                   |
|------------------------------------------|----------------|----------------------|---------------------------------------------------------------------------------------------------------------------------|--------------------------------------------------------------------------|-----------|-------------------------------------------------------------------|
| <b>Harting, et al.</b> <sup>14</sup>     | Netherlands    | 1300                 | Men and women who have a greater than 20% risk (Framingham) of incurring a CVD event within 10 years.                     | Diet, PA and smoking.                                                    | 18 months | Smoking, diet and PA.                                             |
| <b>Korhonen, et al.</b> <sup>15</sup>    | Finland        | 715                  | Men and women aged 25–74 years, with systolic BP 140–179 and/or diastolic BP 90–109 and/or on treatment for hypertension. | Diet and alcohol (also PA and smoking).                                  | 24 months | Weight, BP, cholesterol, alcohol, diet and PA.                    |
| <b>Baron, et al.</b> <sup>16</sup>       | United Kingdom | 368                  | Men and women aged 25 – 60 years.                                                                                         | Diet mainly, but changes in PA, alcohol and smoking were also mentioned. | 12 months | Cholesterol and diet.                                             |
| <b>Knutsen and Knutsen</b> <sup>17</sup> | Norway         | 1373 men, 1143 wives | Men aged 20 – 54 years and women aged 20-49 years, with no known CHD at baseline.                                         | Diet changes, PA and smoking cessation.                                  | 6 years   | CVD-risk, weight, BP, cholesterol, smoking and PA.                |
| <b>Nilsson, et al.</b> <sup>18</sup>     | Sweden         | 86                   | Men and women, born during the period 1925 – 1952, treated hypertensives.                                                 | Diet, smoking, PA and alcohol.                                           | 12 months | Weight, BP, cholesterol, smoking and diet.                        |
| <b>Wood, et al.</b> <sup>19</sup>        | United Kingdom | 7460 men, 5012 women | Men aged 40-59 and their families.                                                                                        | Smoking, weight, diet, alcohol, and PA.                                  | 12 months | CVD-risk, weight, BP, cholesterol and smoking.                    |
| <b>OXCHECK Study Group</b> <sup>20</sup> | United Kingdom | 5559                 | Men and women aged 35-64.                                                                                                 | Diet, smoking and PA.                                                    | 3 years   | CVD-risk, weight, BP, cholesterol, alcohol, diet, PA and smoking. |
| <b>Lindholm, et al.</b> <sup>21</sup>    | Sweden         | 681                  | Men and women aged 30-59 years, had a moderate hyperlipidaemia, and at least two CVD risk factors.                        | Diet, smoking and PA.                                                    | 18 months | CVD-risk, weight, BP, cholesterol, PA and smoking.                |
| <b>Meland, et al.</b> <sup>22</sup>      | Norway         | 127                  | Men aged 30 to 59 years.                                                                                                  | Diet, smoking and PA.                                                    | 12 months | CVD-risk, BP, cholesterol, PA and smoking.                        |
| <b>Avram, et al.</b> <sup>23</sup>       | Romania        | 253                  | Men and women under 80 years, without history of CVD but defined as high risk individuals.                                | Diet and PA.                                                             | 18 months | Weight, alcohol, diet and PA.                                     |
| <b>Steptoe, et al.</b> <sup>24</sup>     | United Kingdom | 883                  | Men and women aged 18 – 69, total cholesterol of 6.5-9; smoker, BMI of 25-35 and lack of regular PA.                      | Smoking, diet and PA.                                                    | 12 months | Weight, BP, cholesterol, diet and PA.                             |
| <b>Sartorelli, et al.</b> <sup>25</sup>  | Brazil         | 104                  | Men and women aged 30-65 years, body mass index of 24-35 kg/m <sup>2</sup> , and non-diabetic.                            | Diet and PA.                                                             | 12 months | Weight, BP, cholesterol, diet and PA.                             |
| <b>Ma, et al.</b> <sup>26</sup>          | United States  | 419                  | Men and women aged 35 to 85 years, had moderately to severely elevated levels of major modifiable CVD risk factors.       | PA, diet and stress reduction.                                           | 15 months | CVD-risk, weight, BP and cholesterol.                             |
| <b>Tibblin and Åberg</b> <sup>27</sup>   | Sweden         | 400                  | Men and women aged 30 - 69 years, on hypertensive drugs                                                                   | Diet, PA and stress management.                                          | 12 months | Weight, BP and cholesterol.                                       |

1  
2  
3  
4  
5  
6  
7  
8  
9  
10  
11  
12  
13  
14  
15  
16  
17  
18  
19  
20  
21  
22  
23  
24  
25  
26  
27  
28  
29  
30  
31  
32  
33  
34  
35  
36  
37  
38  
39  
40  
41  
42  
43  
44  
45  
46  
47

|                                                |                |     |                                                                                                                                                                                                                                                                                                       |                                           |           |                                                          |
|------------------------------------------------|----------------|-----|-------------------------------------------------------------------------------------------------------------------------------------------------------------------------------------------------------------------------------------------------------------------------------------------------------|-------------------------------------------|-----------|----------------------------------------------------------|
| <b>Gomez-Huelgas et al (2015)<sup>28</sup></b> | Spain          | 601 | Men and women aged 18-80 years, with metabolic syndrome.                                                                                                                                                                                                                                              | Diet and PA.                              | 3 years   | Weight, BP, cholesterol, diet and PA.                    |
| <b>Wennehorst et al.<sup>29</sup></b>          | Germany        | 83  | Men and women aged 18-80 years who had either prediabetes, type 2 diabetes, or were at risk of developing diabetes and/or cardiovascular diseases.                                                                                                                                                    | Diet and PA.                              | 12 months | Weight, BP, cholesterol.                                 |
| <b>Salisbury et al.<sup>30</sup></b>           | United Kingdom | 641 | Men and women aged between 40 and 74 years, had a high risk of a cardiovascular event in the next 10 years, and had one or more of the following modifiable risk factors (systolic blood pressure $\geq 140$ mm Hg, body mass index $\geq 30$ , being a current smoker, or any combination of these). | Smoking status, diet, PA and alcohol use. | 12 months | CVD-risk, weight, BP, cholesterol, diet, PA and smoking. |
| <b>Duncan et al.<sup>31</sup></b>              | New Zealand    | 320 | Adults aged 35 to 65 years, a 5-year CVD risk of at least 7%, and/or a BMI of at least 33 kg/m <sup>2</sup> for participants younger than 50 years                                                                                                                                                    | Diet and PA.                              | 12 months | CVD-risk, weight, BP, cholesterol, diet and PA.          |

Note: BMI: body mass index, PA: physical activity, BP: blood pressure, CVD: cardiovascular diseases

## References:

1. Kranjčević K, Marković BB, Lalić DI, et al. Is a targeted and planned GP intervention effective in cardiovascular disease prevention? A randomized controlled trial. *Medical science monitor: international medical journal of experimental and clinical research* 2014;**20**:1180.
2. Vetter ML, Wadden TA, Chittams J, et al. Effect of lifestyle intervention on cardiometabolic risk factors: results of the POWER-UP trial. *International Journal of Obesity* 2013;**37**:S19-S24.
3. Lakerveld J, Bot SD, Chinapaw MJ, et al. Motivational interviewing and problem solving treatment to reduce type 2 diabetes and cardiovascular disease risk in real life: a randomized controlled trial. *Int J Behav Nutr Phys Act* 2013;**10**(47):10.1186.
4. Hardcastle SJ, Taylor AH, Bailey MP, et al. Effectiveness of a motivational interviewing intervention on weight loss, physical activity and cardiovascular disease risk factors: a randomised controlled trial with a 12-month post-intervention follow-up. *Int J Behav Nutr Phys Act* 2013;**10**(40):1-16.
5. Tiessen AH, Smit AJ, Broer J, et al. Randomized controlled trial on cardiovascular risk management by practice nurses supported by self-monitoring in primary care. *BMC family practice* 2012;**13**(1):1.
6. Parra-Medina D, Wilcox S, Salinas J, et al. Results of the Heart Healthy and Ethnically Relevant Lifestyle trial: a cardiovascular risk reduction intervention for African American women attending community health centers. *American journal of public health* 2011;**101**(10):1914-21.
7. Drevenhorn E, Bengtson A, Nilsson PM, et al. Consultation training of nurses for cardiovascular prevention—a randomized study of 2 years duration. *Blood pressure* 2012;**21**(5):293-99.
8. Brett T, Arnold-Reed D, Phan C, et al. The Fremantle Primary Prevention Study: a multicentre randomised trial of absolute cardiovascular risk reduction. *Br J Gen Pract* 2012;**62**(594):e22-e28.
9. Harris MF, Fanaian M, Jayasinghe UW, et al. A cluster randomised controlled trial of vascular risk factor management in general practice. *Med J Aust* 2012;**197**(7):387-93.
10. Mendis S, Johnston SC, Fan W, et al. Cardiovascular risk management and its impact on hypertension control in primary care in low-resource settings: a cluster-randomized trial. *Bulletin of the World Health Organization* 2010;**88**(6):412-19.
11. Koelewijn-van Loon MS, van der Weijden T, van Steenkiste B, et al. Involving patients in cardiovascular risk management with nurse-led clinics: a cluster randomized controlled trial. *Canadian Medical Association Journal* 2009;**181**(12):E267-E74.
12. Eriksson MK, Franks PW, Eliasson M. A 3-year randomized trial of lifestyle intervention for cardiovascular risk reduction in the primary care setting: the Swedish Björknäs study. *PloS one* 2009;**4**(4):e5195.
13. Phelan S, Wadden T, Berkowitz R, et al. Impact of weight loss on the metabolic syndrome. *International journal of obesity* 2007;**31**(9):1442-48.
14. Harting J, van Assema P, van Limpt P, et al. Cardiovascular prevention in the Hartsлаг Limburg project: effects of a high-risk approach on behavioral risk factors in a general practice population. *Preventive medicine* 2006;**43**(5):372-78.
15. Korhonen M, Kastarinen M, Uusitupa M, et al. The effect of intensified diet counseling on the diet of hypertensive subjects in primary health care: a 2-year open randomized controlled trial of lifestyle intervention against hypertension in eastern Finland. *Preventive medicine* 2003;**36**(1):8-16.

16. Baron JA, Gleason R, Crowe B, et al. Preliminary trial of the effect of general practice based nutritional advice. *Br J Gen Pract* 1990;**40**(333):137-41.
17. Knutsen SF, Knutsen R. The Tromsø Survey: the Family Intervention study—the effect of intervention on some coronary risk factors and dietary habits, a 6-year follow-up. *Preventive medicine* 1991;**20**(2):197-212.
18. Nilsson PM, Lindholm LH, Scherstén BF. Life style changes improve insulin resistance in hyperinsulinaemic subjects: a one-year intervention study of hypertensives and normotensives in Dalby. *Journal of hypertension* 1992;**10**(9):1071-78.
19. Wood D, Kinmonth A, Davies G, et al. Randomised controlled trial evaluating cardiovascular screening and intervention in general practice: principal results of British family heart study. *Bmj* 1994;**308**(6924):313-20.
20. OXCHECK. Effectiveness of health checks conducted by nurses in primary care: final results of the OXCHECK study. *BMJ: British Medical Journal* 1995:1099-104.
21. Lindholm LH, Ekblom T, Dash C, et al. The impact of health care advice given in primary care on cardiovascular risk. *BMJ* 1995;**310**(6987):1105-09.
22. Meland E, Lærum E, Ulvik RJ. Effectiveness of two preventive interventions for coronary heart disease in primary care. *Scandinavian journal of primary health care* 1997;**15**(1):57-63.
23. Avram C, Iurciuc M, Craciun L, et al. Dietary and physical activity counseling in high-risk asymptomatic patients with metabolic syndrome—A primary care intervention. *Journal of Food, Agriculture & Environment* 2011;**9**(3&4):16-19.
24. Steptoe A, Day S, Doherty S, et al. Behavioural counselling in general practice for the promotion of healthy behaviour among adults at increased risk of coronary heart disease: randomised trialCommentary: Treatment allocation by the method of minimisation. *Bmj* 1999;**319**(7215):943-48.
25. Sartorelli DS, Sciarra EC, Franco LJ, et al. Beneficial effects of short-term nutritional counselling at the primary health-care level among Brazilian adults. *Public health nutrition* 2005;**8**(07):820-25.
26. Ma J, Berra K, Haskell WL, et al. Case management to reduce risk of cardiovascular disease in a county health care system. *Archives of internal medicine* 2009;**169**(21):1988-95.
27. Tibblin G, Åberg H. NON-PHARMACOLOGICAL TREATMENT OF HYPERTENSION IN TWO STEPS-1 YEAR REPORT FROM EIGHT HEALTH CENTRES. *Acta Medica Scandinavica* 1986;**220**(S714):105-12.
28. Gomez-Huelgas R, Jansen-Chaparro S, Baca-Osorio AJ, et al. Effects of a long-term lifestyle intervention program with Mediterranean diet and exercise for the management of patients with metabolic syndrome in a primary care setting. *European Journal of Internal Medicine* 2015;**26**(5):317-23.
29. Wennehorst K, Mildenstein K, Saliger B, et al. A comprehensive lifestyle intervention to prevent type 2 diabetes and cardiovascular diseases: The german chip trial. *Prevention Science* 2016:No Pagination Specified.
30. Salisbury C, O'Cathain A, Thomas C, et al. Telehealth for patients at high risk of cardiovascular disease: Pragmatic randomised controlled trial. *BMJ (Online)* 2016;**353** (no pagination)(i2647).
31. Duncan S, Goodyear-Smith F, McPhee J, et al. Family-centered brief intervention for reducing obesity and cardiovascular disease risk: A randomized controlled trial. *Obesity* 2016;**24**(11):2311-18.

**Supplementary table 2:** Intervention components and behaviour change techniques employed.

| Study (Year)                             | Study groups   | Who delivered it                     | BCTs <sup>1</sup>                                | Mode of delivery                                           | No. of sessions | Duration of sessions (in mins)                                     |
|------------------------------------------|----------------|--------------------------------------|--------------------------------------------------|------------------------------------------------------------|-----------------|--------------------------------------------------------------------|
| Kranjčević, et al. <sup>1</sup>          | Intervention   | GPs                                  | 1.3, 2.1, 9.1                                    | Face to face and written materials                         | 5               | Unclear                                                            |
|                                          | Control        |                                      | Unclear                                          | Unclear                                                    | Unclear         | Unclear                                                            |
| Vetter, et al. <sup>2</sup>              | Intervention 1 | PCP and lifestyle coach.             | 1.1, 1.5, 2.3, 8.7, 9.1                          | Face to face and written materials                         | 32              | Visits: 5-7 mins, counselling: 10-15 mins.                         |
|                                          | Intervention 2 |                                      | 1.1, 1.5, 2.3, 8.7, 9.1, 11.1                    | Face to face and written materials                         | 32              | Visits: 5-7 mins, counselling: 10-15 mins.                         |
|                                          | Control        |                                      | 1.7                                              | Face to face                                               | 8               | Visits: 5-7 mins.                                                  |
| Lakerveld, et al. <sup>3</sup>           | Intervention   | Nurse                                | 1.2, 1.6                                         | Face to face and phone sessions.                           | 9               | Face to face sessions: 30 mins.                                    |
|                                          | Control        |                                      | 4.1, 5.1                                         | Written materials.                                         | Unclear         | Unclear                                                            |
| Hardcastle, et al. <sup>4</sup>          | Intervention   | PA specialist and dietician          | 1.1, 1.5, 9.2                                    | Face to face.                                              | 5               | 20-30 mins.                                                        |
|                                          | Control        |                                      | 5.1                                              | Written materials.                                         | Unclear         | Unclear                                                            |
| Tiessen, et al. <sup>5</sup>             | Intervention   | Practice nurses.                     | 2.2, 2.3, 2.4, 5.1                               | Face to face.                                              | 7               | First session: 20 min, other sessions based on patient preference. |
|                                          | Control        |                                      | 5.1                                              | Face to face and written materials.                        | One             | Unclear.                                                           |
| Parra-Medina, et al. <sup>6</sup>        | Intervention   | PCP, health educators and nurses     | 1.1, 1.2.                                        | Face to face and telephone sessions and written materials. | Up to 15        | First session: 60 mins. Following sessions: 20 mins.               |
|                                          | Control        |                                      | 1.1                                              | Face to face and written materials.                        | One             | 5-10 mins.                                                         |
| Drevenhorn, et al. <sup>7</sup>          | Intervention   | Nurses                               | 1.1, 1.5, 5.3, 9.2, 10.4, 11.2                   | Face to face                                               | Unclear         | Unclear                                                            |
|                                          | Control        |                                      | Unclear                                          | Unclear                                                    | Unclear         | Unclear                                                            |
| Brett, et al. <sup>8</sup>               | Intervention   | GPs                                  | 1.1, 1.3, 2.7                                    | Face to face                                               | 5               | Unclear                                                            |
|                                          | Control        |                                      | 1.1, 1.3, 2.7                                    | Face to face                                               | 2               | Unclear                                                            |
| Harris, et al. <sup>9</sup>              | Intervention   | Health practitioner, dietitian or PT | 1.1, 1.2, 2.3, 4.1, 6.1, 9.1                     | Face to face                                               | 6               | 90 mins/ session.                                                  |
|                                          | Control        |                                      | Unclear                                          | Unclear                                                    | Unclear         | Unclear                                                            |
| Mendis, et al. <sup>10</sup>             | Intervention   | Health-care workers                  | 2.6, 4.1                                         | Face to face and written materials                         | 4               | Unclear                                                            |
|                                          | Control        |                                      | Unclear                                          | Unclear                                                    | Unclear         | Unclear                                                            |
| Koelewijn-van Loon, et al. <sup>11</sup> | Intervention   | Nurses                               | 1.1, 1.2, 1.4, 1.5, 5.1, 9.2                     | Face to face and telephone sessions                        | 3               | Face to face: 10-20 mins, telephone: 10 mins.                      |
|                                          | Control        |                                      | 5.1                                              | Face to face                                               | One             | Unclear                                                            |
| Eriksson, et al. <sup>12</sup>           | Intervention   | Dietician, PT and assistants.        | 1.1, 1.2, 1.3, 1.4, 4.1, 5.1, 8.1, 8.7, 9.1, 9.2 | Face to face                                               | 56              | Unclear.                                                           |
|                                          | Control        |                                      | 9.1                                              | Face to face and written materials.                        | One             | Unclear                                                            |



1  
2  
3  
4  
5  
6  
7  
8  
9  
10  
11  
12  
13  
14  
15  
16  
17  
18  
19  
20  
21  
22  
23  
24  
25  
26  
27  
28  
29  
30  
31  
32  
33  
34  
35  
36  
37  
38  
39  
40  
41  
42  
43  
44  
45  
46  
47  
48  
49

|                                          |                |                                   |                                    |                                                         |         |                                                              |
|------------------------------------------|----------------|-----------------------------------|------------------------------------|---------------------------------------------------------|---------|--------------------------------------------------------------|
| <b>Phelan, et al.</b> <sup>13</sup>      | Intervention 1 | PCP                               | 2.3, 11.1.                         | Face to face and written materials.                     | 8       | 5-10 mins.                                                   |
|                                          | Intervention 2 | Psychologist                      | 1.5, 2.3, 9.1                      | Group sessions.                                         | 29      | 90 mins                                                      |
|                                          | Intervention 3 | Psychologist, PCP                 | 1.5, 2.3, 9.1, 11.1                | Face to face, group sessions and written material.      | 37      | Face to face: 5-10 mins, group sessions: 90 mins.            |
|                                          | Intervention 4 | PCP                               | 1.5, 2.3, 9.1, 11.1                | Face to face and written materials.                     | 8       | 5-10 mins.                                                   |
| <b>Harting, et al.</b> <sup>14</sup>     | Intervention   | Practice assistant and dietician. | 1.1, 1.4, 9.1, 11.1                | Face to face, telephone sessions and written materials. | Unclear | Unclear                                                      |
|                                          | Control        |                                   | Unclear                            | Unclear                                                 | Unclear | Unclear                                                      |
| <b>Korhonen, et al.</b> <sup>15</sup>    | Intervention   | Healthcare centre personnel.      | 1.1, 1.3, 1.4, 2.3, 2.5, 4.1, 9.1  | Face to face.                                           | 7       | Unclear                                                      |
|                                          | Control        |                                   | Unclear                            | Unclear                                                 | Unclear | Unclear                                                      |
| <b>Baron, et al.</b> <sup>16</sup>       | Intervention   | Nurse                             | 5.1, 9.1                           | Face to face, group sessions and written material.      | Unclear | 30 mins.                                                     |
|                                          | Control        |                                   | Unclear                            | Unclear                                                 | Unclear | Unclear                                                      |
| <b>Knutsen and Knutsen</b> <sup>17</sup> | Intervention   | Physicians and dieticians         | 1.1, 4.1, 5.1, 6.1, 9.1            | Face to face and telephone sessions.                    | 8       | Unclear                                                      |
|                                          | Control        |                                   | Unclear                            | Unclear                                                 | Unclear | Unclear                                                      |
| <b>Nilsson, et al.</b> <sup>18</sup>     | Intervention   | Nurse, dietician or PT.           | 1.1, 2.2, 3.1, 4.1, 6.1, 9.1, 12.5 | Face to face, group sessions and videotapes.            | Unclear | Unclear                                                      |
|                                          | Control        |                                   | 2.2, 5.1                           | Face to face                                            | One     | Unclear                                                      |
| <b>Wood, et al.</b> <sup>19</sup>        | Intervention   | Nurses                            | 1.1, 2.7, 5.1, 6.2, 9.1            | Face to face and written materials                      | Unclear | First session: 90 mins.                                      |
|                                          | Control        |                                   | 9.1                                | Face to face                                            | One     | 45 mins                                                      |
| <b>OXCHECK Study Group</b> <sup>20</sup> | Intervention   | Nurses                            | 1.3, 2.7, 9.1,                     | Face to face                                            | Unclear | Initial session: 45-60 mins, following sessions: 10-20 mins. |
|                                          | Control        |                                   | Unclear                            | None                                                    | None    | None                                                         |
| <b>Lindholm, et al.</b> <sup>21</sup>    | Intervention   | Doctors and nurses                | 2.3, 4.1, 5.1, 6.2, 9.1            | Face to face, group sessions and written materials      | 11      | Five group sessions: 90 mins, one group session: all day.    |
|                                          | Control        |                                   | 9.1                                | Face to face and written materials                      | 5       | Unclear                                                      |
| <b>Meland, et al.</b> <sup>22</sup>      | Intervention   | GPs                               | 1.8, 2.3, 8.7, 9.1, 11.2           | Face to face and written materials                      | 4       | Unclear                                                      |
|                                          | Control        |                                   | 9.1                                | Face to face and written materials                      | 4       | Unclear                                                      |
| <b>Avram, et al.</b> <sup>23</sup>       | Intervention   | GPs                               | 1.1, 9.1                           | Face to face and telephone sessions                     | 21      | Face to face sessions: 30 mins.                              |
|                                          | Control        |                                   | Unclear                            | Written materials                                       | None    | None                                                         |
| <b>Stephoe, et al.</b> <sup>24</sup>     | Intervention   | Nurses                            | 1.1, 1.4, 9.1, 11.1                | Face to face and telephone sessions                     | 2-3     | Face to face sessions: 20 mins.                              |
|                                          | Control        |                                   | Unclear                            | Unclear                                                 | Unclear | Unclear                                                      |
| <b>Sartorelli, et al.</b> <sup>25</sup>  | Intervention   | Nutritionist                      | 1.1, 1.4, 9.1                      | Face to face and group sessions and written materials.  | 4       | Unclear                                                      |
|                                          | Control        |                                   | Unclear                            | Group session and written materials                     | 1       | Unclear                                                      |

|                                           |              |                            |                                    |                                                                       |         |                                                      |
|-------------------------------------------|--------------|----------------------------|------------------------------------|-----------------------------------------------------------------------|---------|------------------------------------------------------|
| <b>Ma, et al.</b> <sup>26</sup>           | Intervention | Nurses and dietitians      | 1.1, 1.2, 1.7, 9.1, 11.1, 11.2     | Face to face                                                          | 8-10    | 30-60 mins                                           |
|                                           | Control      |                            | Unclear                            | Unclear                                                               | Unclear | Unclear                                              |
| <b>Tibblin and Åberg</b> <sup>27</sup>    | Intervention | Nurses and physicians      | 2.5, 6.1, 9.1                      | Face to face, group sessions and videotapes and audiotapes.           | 15      | Unclear                                              |
|                                           | Control      |                            | 2.5, 9.1                           | Face to face                                                          | 15      | Unclear                                              |
| <b>Gomez-Huelgas et al.</b> <sup>28</sup> | Intervention | Nurses and physicians      | 1.3, 1.4, 2.5, 4.1, 9.1            | Face to face, group sessions and written materials.                   | 27      | Health assessment: 15 mins, nursing visits: 30 mins. |
|                                           | Control      |                            | 2.5, 9.1                           | Face to face and written materials                                    | 24      | 10 mins.                                             |
| <b>Wennehorst et al.</b> <sup>29</sup>    | Intervention | Physician and nutritionist | 1.4, 3.1, 4.1, 9.1, 11.2.          | Face to face, group sessions and written materials.                   | 16      | 2.5 hrs/ session.                                    |
|                                           | Control      |                            | Unclear                            | Unclear                                                               | Unclear | Unclear                                              |
| <b>Salisbury et al.</b> <sup>30</sup>     | Intervention | Health advisors            | 1.1, 1.6, 2.4, 5.1, 9.1, 11.1.     | Computerised behavioural management programme and telephone sessions. | 12      | Telephone sessions: an average of 18 mins/session.   |
|                                           | Control      |                            | Unclear                            | Unclear                                                               | Unclear | Unclear                                              |
| <b>Duncan et al.</b> <sup>31</sup>        | Intervention | Trained health promoter    | 1.1, 1.4, 1.5, 2.3, 2.6, 3.1, 8.7. | Face to face group sessions and written materials.                    | 5       | 60mins/ session.                                     |
|                                           | Control      |                            | 2.6                                | Face to face                                                          | unclear | Unclear                                              |

<sup>1</sup> as coded in Michie, Richardson et al.<sup>32</sup> taxonomy of behaviour change technique

Note: 1.1 Goal setting (behaviour); 1.2 Problem solving; 1.3 Goal setting (outcome); 1.4 Action planning; 1.5 Review behaviour goals(s); 1.6 Discrepancy between current behaviour and goal; 1.7 Review outcome goal(s); 1.8 Behavioural contract; 2.1 Monitoring of behaviour by others without feedback; 2.2 Feedback on behaviour; 2.3 self-monitoring of behaviour; 2.4 Self-monitoring of outcome(s) of behaviour; 2.5 Monitoring of outcomes of behaviour without feedback; 2.6 Biofeedback; 2.7 Feedback on outcome(s) of behaviour; 3.1 Social support (unspecified); 4.1 Instructions on how to perform a behaviour; 5.1 Information about health consequences; 5.3 Information about social and environmental consequences; 6.1 Demonstration of the behaviour; 6.2 Social comparison; 8.1 Behavioural practice/rehearsal; 8.7 Graded tasks; 9.1 Credible source; 9.2 Pros and cons; 10.4 Social reward; 11.1 Pharmacological support; 11.2 Reduce negative emotions; 12.5 Adding objects to the environment; PT Physiotherapist, PA Physical activity

## References:

1. Kranjčević K, Marković BB, Lalić DI, et al. Is a targeted and planned GP intervention effective in cardiovascular disease prevention? A randomized controlled trial. *Medical science monitor: international medical journal of experimental and clinical research* 2014;**20**:1180.
2. Vetter ML, Wadden TA, Chittams J, et al. Effect of lifestyle intervention on cardiometabolic risk factors: results of the POWER-UP trial. *International Journal of Obesity* 2013;**37**:S19-S24.
3. Lakerveld J, Bot SD, Chinapaw MJ, et al. Motivational interviewing and problem solving treatment to reduce type 2 diabetes and cardiovascular disease risk in real life: a randomized controlled trial. *Int J Behav Nutr Phys Act* 2013;**10**(47):10.1186.
4. Hardcastle SJ, Taylor AH, Bailey MP, et al. Effectiveness of a motivational interviewing intervention on weight loss, physical activity and cardiovascular disease risk factors: a randomised controlled trial with a 12-month post-intervention follow-up. *Int J Behav Nutr Phys Act* 2013;**10**(40):1-16.
5. Tiessen AH, Smit AJ, Broer J, et al. Randomized controlled trial on cardiovascular risk management by practice nurses supported by self-monitoring in primary care. *BMC family practice* 2012;**13**(1):1.
6. Parra-Medina D, Wilcox S, Salinas J, et al. Results of the Heart Healthy and Ethnically Relevant Lifestyle trial: a cardiovascular risk reduction intervention for African American women attending community health centers. *American journal of public health* 2011;**101**(10):1914-21.
7. Drevenhorn E, Bengtson A, Nilsson PM, et al. Consultation training of nurses for cardiovascular prevention—a randomized study of 2 years duration. *Blood pressure* 2012;**21**(5):293-99.
8. Brett T, Arnold-Reed D, Phan C, et al. The Fremantle Primary Prevention Study: a multicentre randomised trial of absolute cardiovascular risk reduction. *Br J Gen Pract* 2012;**62**(594):e22-e28.
9. Harris MF, Fanaian M, Jayasinghe UW, et al. A cluster randomised controlled trial of vascular risk factor management in general practice. *Med J Aust* 2012;**197**(7):387-93.
10. Mendis S, Johnston SC, Fan W, et al. Cardiovascular risk management and its impact on hypertension control in primary care in low-resource settings: a cluster-randomized trial. *Bulletin of the World Health Organization* 2010;**88**(6):412-19.
11. Koelewijn-van Loon MS, van der Weijden T, van Steenkiste B, et al. Involving patients in cardiovascular risk management with nurse-led clinics: a cluster randomized controlled trial. *Canadian Medical Association Journal* 2009;**181**(12):E267-E74.
12. Eriksson MK, Franks PW, Eliasson M. A 3-year randomized trial of lifestyle intervention for cardiovascular risk reduction in the primary care setting: the Swedish Björknäs study. *PloS one* 2009;**4**(4):e5195.
13. Phelan S, Wadden T, Berkowitz R, et al. Impact of weight loss on the metabolic syndrome. *International journal of obesity* 2007;**31**(9):1442-48.
14. Harting J, van Assema P, van Limpt P, et al. Cardiovascular prevention in the Hartsлаг Limburg project: effects of a high-risk approach on behavioral risk factors in a general practice population. *Preventive medicine* 2006;**43**(5):372-78.
15. Korhonen M, Kastarinen M, Uusitupa M, et al. The effect of intensified diet counseling on the diet of hypertensive subjects in primary health care: a 2-year open randomized controlled trial of lifestyle intervention against hypertension in eastern Finland. *Preventive medicine* 2003;**36**(1):8-16.
16. Baron JA, Gleason R, Crowe B, et al. Preliminary trial of the effect of general practice based nutritional advice. *Br J Gen Pract* 1990;**40**(333):137-41.

17. Knutsen SF, Knutsen R. The Tromsø Survey: the Family Intervention study—the effect of intervention on some coronary risk factors and dietary habits, a 6-year follow-up. *Preventive medicine* 1991;**20**(2):197-212.
18. Nilsson PM, Lindholm LH, Scherstén BF. Life style changes improve insulin resistance in hyperinsulinaemic subjects: a one-year intervention study of hypertensives and normotensives in Dalby. *Journal of hypertension* 1992;**10**(9):1071-78.
19. Wood D, Kinmonth A, Davies G, et al. Randomised controlled trial evaluating cardiovascular screening and intervention in general practice: principal results of British family heart study. *Bmj* 1994;**308**(6924):313-20.
20. OXCHECK. Effectiveness of health checks conducted by nurses in primary care: final results of the OXCHECK study. *BMJ: British Medical Journal* 1995:1099-104.
21. Lindholm LH, Ekblom T, Dash C, et al. The impact of health care advice given in primary care on cardiovascular risk. *BMJ* 1995;**310**(6987):1105-09.
22. Meland E, Lærum E, Ulvik RJ. Effectiveness of two preventive interventions for coronary heart disease in primary care. *Scandinavian journal of primary health care* 1997;**15**(1):57-63.
23. Avram C, Iurciuc M, Craciun L, et al. Dietary and physical activity counseling in high-risk asymptomatic patients with metabolic syndrome—A primary care intervention. *Journal of Food, Agriculture & Environment* 2011;**9**(3&4):16-19.
24. Steptoe A, Day S, Doherty S, et al. Behavioural counselling in general practice for the promotion of healthy behaviour among adults at increased risk of coronary heart disease: randomised trialCommentary: Treatment allocation by the method of minimisation. *Bmj* 1999;**319**(7215):943-48.
25. Sartorelli DS, Sciarra EC, Franco LJ, et al. Beneficial effects of short-term nutritional counselling at the primary health-care level among Brazilian adults. *Public health nutrition* 2005;**8**(07):820-25.
26. Ma J, Berra K, Haskell WL, et al. Case management to reduce risk of cardiovascular disease in a county health care system. *Archives of internal medicine* 2009;**169**(21):1988-95.
27. Tibblin G, Åberg H. NON-PHARMACOLOGICAL TREATMENT OF HYPERTENSION IN TWO STEPS-1 YEAR REPORT FROM EIGHT HEALTH CENTRES. *Acta Medica Scandinavica* 1986;**220**(S714):105-12.
28. Gomez-Huelgas R, Jansen-Chaparro S, Baca-Osorio AJ, et al. Effects of a long-term lifestyle intervention program with Mediterranean diet and exercise for the management of patients with metabolic syndrome in a primary care setting. *European Journal of Internal Medicine* 2015;**26**(5):317-23.
29. Wennehorst K, Mildenstein K, Saliger B, et al. A comprehensive lifestyle intervention to prevent type 2 diabetes and cardiovascular diseases: The german chip trial. *Prevention Science* 2016:No Pagination Specified.
30. Salisbury C, O'Cathain A, Thomas C, et al. Telehealth for patients at high risk of cardiovascular disease: Pragmatic randomised controlled trial. *BMJ* (Online) 2016;**353** (no pagination)(i2647).
31. Duncan S, Goodyear-Smith F, McPhee J, et al. Family-centered brief intervention for reducing obesity and cardiovascular disease risk: A randomized controlled trial. *Obesity* 2016;**24**(11):2311-18.
32. Michie S, Richardson M, Johnston M, et al. The behavior change technique taxonomy (v1) of 93 hierarchically clustered techniques: building an international consensus for the reporting of behavior change interventions. *Annals of behavioral medicine* 2013;**46**(1):81-95.

Supplementary table 3: Risk of bias assessment.

| Study<br>(Year)                     | Risk of bias                                                   |                                        |                                                                                     |                                               |                                         |                                     |
|-------------------------------------|----------------------------------------------------------------|----------------------------------------|-------------------------------------------------------------------------------------|-----------------------------------------------|-----------------------------------------|-------------------------------------|
|                                     | Sequence generation<br>(randomisation<br>methods) <sup>a</sup> | Allocation<br>concealment <sup>b</sup> | Blinding of participants<br>and personnel to study<br>group allocation <sup>c</sup> | Blinding of outcome<br>assessors <sup>d</sup> | Incomplete<br>outcome data <sup>e</sup> | Selective<br>reporting <sup>f</sup> |
| Kranjčević, K. et al (2014)         | Unclear                                                        | Unclear                                | Unclear                                                                             | Unclear                                       | High                                    | Low                                 |
| Vetter et al. (2013)                | Low                                                            | Low                                    | High                                                                                | Low                                           | High                                    | Low                                 |
| Lakerveld et al. (2012)             | Low                                                            | Low                                    | High                                                                                | High                                          | High                                    | Low                                 |
| Hardcastle et al. (2013)            | Low                                                            | Low                                    | Low                                                                                 | Low                                           | High                                    | Low                                 |
| Tiessen et al. (2012)               | Low                                                            | Low                                    | High                                                                                | High                                          | Unclear                                 | Low                                 |
| Parra-Medina et al. (2011)          | Unclear                                                        | Unclear                                | Low                                                                                 | Low                                           | High                                    | High                                |
| Drevenhorn et al. (2012)            | Unclear                                                        | Unclear                                | Unclear                                                                             | Unclear                                       | High                                    | Low                                 |
| Brett et al. (2012)                 | Low                                                            | High                                   | High                                                                                | High                                          | Low                                     | High                                |
| Harris et al. (2012)                | Low                                                            | Low                                    | High                                                                                | Low                                           | Low                                     | Low                                 |
| Mendis et al. (2010)                | Unclear                                                        | Unclear                                | High                                                                                | High                                          | Low                                     | Unclear                             |
| Koelewijn-van Loon et al.<br>(2009) | Low                                                            | Low                                    | High                                                                                | High                                          | High                                    | Low                                 |
| Eriksson et al. (2009)              | Low                                                            | Low                                    | High                                                                                | High                                          | Unclear                                 | Low                                 |
| Phelan et al. (2007)                | Unclear                                                        | Unclear                                | Unclear                                                                             | Unclear                                       | Unclear                                 | Unclear                             |
| Harting et al. (2006)               | Unclear                                                        | Unclear                                | Unclear                                                                             | Unclear                                       | Unclear                                 | Unclear                             |
| Korhonen et al. (2003)              | High                                                           | High                                   | High                                                                                | Unclear                                       | High                                    | Low                                 |
| Baron et al. (1990)                 | Unclear                                                        | Unclear                                | Unclear                                                                             | Unclear                                       | Unclear                                 | Unclear                             |
| Knutsen and Knutsen<br>(1991)       | Low                                                            | Low                                    | Unclear                                                                             | Low                                           | Low                                     | Low                                 |
| Nilsson et al. (1992)               | Unclear                                                        | Unclear                                | Unclear                                                                             | Low                                           | Low                                     | Low                                 |
| Wood et al. (1994)                  | Unclear                                                        | Unclear                                | Unclear                                                                             | Unclear                                       | Unclear                                 | Low                                 |
| OXCHECK Study group<br>(1995)       | Unclear                                                        | Unclear                                | High                                                                                | Low                                           | Unclear                                 | Low                                 |
| Lindholm et al. (1995)              | Unclear                                                        | Unclear                                | High                                                                                | Unclear                                       | Low                                     | Low                                 |
| Meland et al. (1997)                | Unclear                                                        | Unclear                                | Unclear                                                                             | Unclear                                       | Unclear                                 | Unclear                             |
| Avram et al. (2011)                 | Unclear                                                        | Unclear                                | Low                                                                                 | Low                                           | Low                                     | Unclear                             |

|                             |         |         |         |         |         |         |
|-----------------------------|---------|---------|---------|---------|---------|---------|
| Step toe et al. (1999)      | Low     | Low     | High    | High    | High    | Low     |
| Sartorelli et al. (2005)    | Low     | Low     | Low     | High    | High    | Unclear |
| Ma et al. (2009)            | Low     | Low     | Low     | Low     | Unclear | Low     |
| Åberg and Tibblin (1989)    | Low     | Low     | Unclear | Unclear | Low     | Unclear |
| Gomez-Huelgas et al. (2015) | Unclear | Unclear | High    | High    | High    | Unclear |
| Wennehorst et al. (2016)    | Low     | Low     | Unclear | Unclear | High    | Unclear |
| Salisbury et al. (2016)     | Low     | Low     | High    | Low     | Low     | Low     |
| Duncan et al. (2016)        | Low     | Low     | High    | Low     | High    | Low     |

<sup>a</sup> Assessment of whether or not methods used to generate the allocation sequence should produce comparable groups.

<sup>b</sup> Assessment of whether or not the method used to conceal allocation sequence is sufficient or not.

<sup>c</sup> Assessment of the methods used to blind study participants and personnel from knowing intervention allocation.

<sup>d</sup> Assessment of the methods used to blind study outcome assessors from knowing intervention allocation, and whether or not this method of blinding is sufficient.

<sup>e</sup> Assessment of whether incomplete outcome data were adequately dealt with. Studies missing outcome data for >20% of participants who underwent randomization were considered at high risk of bias, while studies missing <10% of participants who underwent randomization were considered at low risk of bias.

<sup>f</sup> Assessment of whether all outcome measures described in the introduction and methods section of the paper (and published protocols) were reported.

Supplementary table 4: Theory use evaluation using Theory Coding Scheme.

| Study                       | Theory used                                                | Item 1 | Item 2 | Item 3 | Item 4 | Item 5      | Item 6 | Item 7 | Item 8 | Item 9 | Item 10 | Item 11 | Item 12 | Item 13 | Item 14      | Item 15     | Item 16 | Item 17 | Item 18     | Item 19 |
|-----------------------------|------------------------------------------------------------|--------|--------|--------|--------|-------------|--------|--------|--------|--------|---------|---------|---------|---------|--------------|-------------|---------|---------|-------------|---------|
| Kranjčević, K. et al (2014) | Theory use is not reported                                 | N/A    | N/A    | N/A    | N/A    | N/A         | N/A    | N/A    | N/A    | N/A    | N/A     | N/A     | N/A     | N/A     | N/A          | N/A         | N/A     | N/A     | N/A         | N/A     |
| Vetter et al. (2013)        | Social cognitive and behaviour al self-managem ent theory  | Yes    | Yes    | No     | No     | Yes         | No     | No     | Yes    | Yes    | No      | Yes     | No      | N/A     | A, B,C and D | No          | No      | No      | No          | No      |
| Lakerveld et al. (2012)     | Theory of planned behaviour and theory of self-regulation. | Yes    | Yes    | No     | No     | Yes         | No     | Yes    | No     | Yes    | No      | Yes     | B       | A       | A and B      | Yes         | No      | Yes     | No          | No      |
| Hardcastle et al. (2013)    | Theory use is not reported                                 | N/A    | N/A    | N/A    | N/A    | N/A         | N/A    | N/A    | N/A    | N/A    | N/A     | N/A     | N/A     | N/A     | N/A          | N/A         | N/A     | N/A     | N/A         | N/A     |
| Tiessen et al. (2012)       | Stages of change                                           | Yes    | No     | Yes    | Yes    | Do not know | No     | No     | No     | No     | No      | No      | No      | N/A     | A, B,C and D | Do not know | No      | No      | Do not know | No      |
| Parra-Medina et al. (2011)  | Trans-theoretical model and social cognitive theory        | Yes    | Yes    | No     | No     | Yes         | Yes    | Yes    | No     | Yes    | No      | Yes     | No      | No      | A            | Do not know | No      | No      | Do not know | No      |
| Drevenhorn et al. (2012)    | Stages of changes model                                    | Yes    | Yes    | Yes    | No     | Yes         | Yes    | Yes    | No     | Yes    | Yes     | No      | No      | N/A     | A            | Do not know | No      | No      | Do not know | No      |
| Brett et al. (2012)         | Theory use is not reported                                 | N/A    | N/A    | N/A    | N/A    | N/A         | N/A    | N/A    | N/A    | N/A    | N/A     | N/A     | N/A     | N/A     | N/A          | N/A         | N/A     | N/A     | N/A         | N/A     |

1  
2  
3  
4  
5  
6  
7  
8  
9  
10  
11  
12  
13  
14  
15  
16  
17  
18  
19  
20  
21  
22  
23  
24  
25  
26  
27  
28  
29  
30  
31  
32  
33  
34  
35  
36  
37  
38  
39  
40  
41  
42  
43  
44  
45  
46  
47

|                                 |                            |     |     |     |     |     |     |     |     |     |     |     |     |     |         |     |     |     |     |     |
|---------------------------------|----------------------------|-----|-----|-----|-----|-----|-----|-----|-----|-----|-----|-----|-----|-----|---------|-----|-----|-----|-----|-----|
| Harris et al. (2012)            | Stages of changes model    | Yes | Yes | Yes | No  | No  | Yes | No  | No  | No  | No  | No  | No  | N/A | A and B | No  | No  | No  | No  | No  |
| Mendis et al. (2010)            | Theory use is not reported | N/A | N/A | N/A | N/A | N/A | N/A | N/A | N/A | N/A | N/A | N/A | N/A | N/A | N/A     | N/A | N/A | N/A | N/A | N/A |
| Koelwijn-van Loon et al. (2009) | Theory use is not reported | N/A | N/A | N/A | N/A | N/A | N/A | N/A | N/A | N/A | N/A | N/A | N/A | N/A | N/A     | N/A | N/A | N/A | N/A | N/A |
| Eriksson et al. (2009)          | Stages of change model     | Yes | Yes | Yes | No  | No  | No  | No  | No  | No  | No  | No  | No  | N/A | No      | No  | No  | No  | No  | No  |
| Phelan et al. (2007)            | Theory use is not reported | N/A | N/A | N/A | N/A | N/A | N/A | N/A | N/A | N/A | N/A | N/A | N/A | N/A | N/A     | N/A | N/A | N/A | N/A | N/A |
| Harting et al. (2006)           | Theory use is not reported | N/A | N/A | N/A | N/A | N/A | N/A | N/A | N/A | N/A | N/A | N/A | N/A | N/A | N/A     | N/A | N/A | N/A | N/A | N/A |
| Korhonen et al. (2003)          | Theory use is not reported | N/A | N/A | N/A | N/A | N/A | N/A | N/A | N/A | N/A | N/A | N/A | N/A | N/A | N/A     | N/A | N/A | N/A | N/A | N/A |
| Baron et al. (1990)             | Theory use is not reported | N/A | N/A | N/A | N/A | N/A | N/A | N/A | N/A | N/A | N/A | N/A | N/A | N/A | N/A     | N/A | N/A | N/A | N/A | N/A |
| Knutsen and Knutsen (1991)      | Theory use is not reported | N/A | N/A | N/A | N/A | N/A | N/A | N/A | N/A | N/A | N/A | N/A | N/A | N/A | N/A     | N/A | N/A | N/A | N/A | N/A |
| Nilsson et al. (1992)           | Theory use is not reported | N/A | N/A | N/A | N/A | N/A | N/A | N/A | N/A | N/A | N/A | N/A | N/A | N/A | N/A     | N/A | N/A | N/A | N/A | N/A |
| Wood et al. (1994)              | Theory use is not reported | N/A | N/A | N/A | N/A | N/A | N/A | N/A | N/A | N/A | N/A | N/A | N/A | N/A | N/A     | N/A | N/A | N/A | N/A | N/A |
| OXCHECK Study group (1995)      | Theory use is not reported | N/A | N/A | N/A | N/A | N/A | N/A | N/A | N/A | N/A | N/A | N/A | N/A | N/A | N/A     | N/A | N/A | N/A | N/A | N/A |



|    |                             |                                                     |     |     |     |     |     |     |     |     |     |     |     |     |         |     |     |     |     |     |     |
|----|-----------------------------|-----------------------------------------------------|-----|-----|-----|-----|-----|-----|-----|-----|-----|-----|-----|-----|---------|-----|-----|-----|-----|-----|-----|
| 1  |                             |                                                     |     |     |     |     |     |     |     |     |     |     |     |     |         |     |     |     |     |     |     |
| 2  |                             |                                                     |     |     |     |     |     |     |     |     |     |     |     |     |         |     |     |     |     |     |     |
| 3  | Lindholm et al. (1995)      | Theory use is not reported                          | N/A | N/A | N/A | N/A | N/A | N/A | N/A | N/A | N/A | N/A | N/A | N/A | N/A     | N/A | N/A | N/A | N/A | N/A | N/A |
| 4  |                             |                                                     |     |     |     |     |     |     |     |     |     |     |     |     |         |     |     |     |     |     |     |
| 5  | Meland et al. (1997)        | Theory use is not reported                          | N/A | N/A | N/A | N/A | N/A | N/A | N/A | N/A | N/A | N/A | N/A | N/A | N/A     | N/A | N/A | N/A | N/A | N/A | N/A |
| 6  |                             |                                                     |     |     |     |     |     |     |     |     |     |     |     |     |         |     |     |     |     |     |     |
| 7  | Avram et al. (2011)         | Theory use is not reported                          | N/A | N/A | N/A | N/A | N/A | N/A | N/A | N/A | N/A | N/A | N/A | N/A | N/A     | N/A | N/A | N/A | N/A | N/A | N/A |
| 8  |                             |                                                     |     |     |     |     |     |     |     |     |     |     |     |     |         |     |     |     |     |     |     |
| 9  | Steptoe et al. (1999)       | Stages of change model                              | Yes | Yes | Yes | No  | No  | No  | No  | No  | No  | No  | No  | Yes | C and F | N/A | N/A | N/A | N/A | N/A | N/A |
| 10 |                             |                                                     |     |     |     |     |     |     |     |     |     |     |     |     |         |     |     |     |     |     |     |
| 11 | Sartorelli et al. (2005)    | Theory use is not reported                          | N/A | N/A | N/A | N/A | N/A | N/A | N/A | N/A | N/A | N/A | N/A | N/A | N/A     | N/A | N/A | N/A | N/A | N/A | N/A |
| 12 |                             |                                                     |     |     |     |     |     |     |     |     |     |     |     |     |         |     |     |     |     |     |     |
| 13 | Ma et al. (2009)            | Social cognitive theory and trans-theoretical model | Yes | No  | No  | No  | No  | No  | No  | No  | No  | No  | No  | No  | N/A     | N/A | N/A | N/A | No  | No  | No  |
| 14 |                             |                                                     |     |     |     |     |     |     |     |     |     |     |     |     |         |     |     |     |     |     |     |
| 15 | Åberg and Tibblin (1989)    | Theory use is not reported                          | N/A | N/A | N/A | N/A | N/A | N/A | N/A | N/A | N/A | N/A | N/A | N/A | N/A     | N/A | N/A | N/A | N/A | N/A | N/A |
| 16 |                             |                                                     |     |     |     |     |     |     |     |     |     |     |     |     |         |     |     |     |     |     |     |
| 17 | Gomez-Huelgas et al. (2015) | Theory use is not reported                          | N/A | N/A | N/A | N/A | N/A | N/A | N/A | N/A | N/A | N/A | N/A | N/A | N/A     | N/A | N/A | N/A | N/A | N/A | N/A |
| 18 |                             |                                                     |     |     |     |     |     |     |     |     |     |     |     |     |         |     |     |     |     |     |     |
| 19 | Wennehorts et al. (2016)    | Theory use is not reported                          | N/A | N/A | N/A | N/A | N/A | N/A | N/A | N/A | N/A | N/A | N/A | N/A | N/A     | N/A | N/A | N/A | N/A | N/A | N/A |
| 20 |                             |                                                     |     |     |     |     |     |     |     |     |     |     |     |     |         |     |     |     |     |     |     |
| 21 | Salisbury et al. (2016)     | Theory use is not reported                          | N/A | N/A | N/A | N/A | N/A | N/A | N/A | N/A | N/A | N/A | N/A | N/A | N/A     | N/A | N/A | N/A | N/A | N/A | N/A |
| 22 |                             |                                                     |     |     |     |     |     |     |     |     |     |     |     |     |         |     |     |     |     |     |     |
| 23 | Duncan et al. (2016)        | Theory use is not reported                          | N/A | N/A | N/A | N/A | N/A | N/A | N/A | N/A | N/A | N/A | N/A | N/A | N/A     | N/A | N/A | N/A | N/A | N/A | N/A |
| 24 |                             |                                                     |     |     |     |     |     |     |     |     |     |     |     |     |         |     |     |     |     |     |     |
| 25 |                             |                                                     |     |     |     |     |     |     |     |     |     |     |     |     |         |     |     |     |     |     |     |
| 26 |                             |                                                     |     |     |     |     |     |     |     |     |     |     |     |     |         |     |     |     |     |     |     |
| 27 |                             |                                                     |     |     |     |     |     |     |     |     |     |     |     |     |         |     |     |     |     |     |     |
| 28 |                             |                                                     |     |     |     |     |     |     |     |     |     |     |     |     |         |     |     |     |     |     |     |
| 29 |                             |                                                     |     |     |     |     |     |     |     |     |     |     |     |     |         |     |     |     |     |     |     |
| 30 |                             |                                                     |     |     |     |     |     |     |     |     |     |     |     |     |         |     |     |     |     |     |     |
| 31 |                             |                                                     |     |     |     |     |     |     |     |     |     |     |     |     |         |     |     |     |     |     |     |
| 32 |                             |                                                     |     |     |     |     |     |     |     |     |     |     |     |     |         |     |     |     |     |     |     |
| 33 |                             |                                                     |     |     |     |     |     |     |     |     |     |     |     |     |         |     |     |     |     |     |     |
| 34 |                             |                                                     |     |     |     |     |     |     |     |     |     |     |     |     |         |     |     |     |     |     |     |
| 35 |                             |                                                     |     |     |     |     |     |     |     |     |     |     |     |     |         |     |     |     |     |     |     |
| 36 |                             |                                                     |     |     |     |     |     |     |     |     |     |     |     |     |         |     |     |     |     |     |     |
| 37 |                             |                                                     |     |     |     |     |     |     |     |     |     |     |     |     |         |     |     |     |     |     |     |
| 38 |                             |                                                     |     |     |     |     |     |     |     |     |     |     |     |     |         |     |     |     |     |     |     |
| 39 |                             |                                                     |     |     |     |     |     |     |     |     |     |     |     |     |         |     |     |     |     |     |     |
| 40 |                             |                                                     |     |     |     |     |     |     |     |     |     |     |     |     |         |     |     |     |     |     |     |
| 41 |                             |                                                     |     |     |     |     |     |     |     |     |     |     |     |     |         |     |     |     |     |     |     |
| 42 |                             |                                                     |     |     |     |     |     |     |     |     |     |     |     |     |         |     |     |     |     |     |     |
| 43 |                             |                                                     |     |     |     |     |     |     |     |     |     |     |     |     |         |     |     |     |     |     |     |
| 44 |                             |                                                     |     |     |     |     |     |     |     |     |     |     |     |     |         |     |     |     |     |     |     |
| 45 |                             |                                                     |     |     |     |     |     |     |     |     |     |     |     |     |         |     |     |     |     |     |     |
| 46 |                             |                                                     |     |     |     |     |     |     |     |     |     |     |     |     |         |     |     |     |     |     |     |
| 47 |                             |                                                     |     |     |     |     |     |     |     |     |     |     |     |     |         |     |     |     |     |     |     |

- 1
- 2
- 3
- 4 Item 1) Theory/ model of behaviour mentioned
- 5
- 6 Item 2) Targeted construct mentioned
- 7
- 8 Item 3) Intervention based on single theory
- 9
- 10 Item 4) Theory used to select recipients
- 11
- 12 Item 5) Theory used to select intervention techniques
- 13
- 14 Item 6) Theory used to tailor intervention techniques to recipients
- 15
- 16 Item 7) All intervention techniques are explicitly linked to theory construct
- 17
- 18 Item 8) At least one of the intervention techniques are explicitly linked to theory construct
- 19
- 20 Item 9) Group of techniques are linked to a group of constructs
- 21
- 22 Item 10) All theory relevant constructs are explicitly linked to at least one intervention technique.
- 23
- 24 Item 11) At least one of the theory relevant constructs are explicitly linked to at least one intervention technique.
- 25
- 26 Item 12) theory-relevant constructs are measured
- 27
- 28 Item 13) Quality of measures
- 29
- 30 Item 14) Randomization of participants' condition
- 31
- 32 Item 15) Changes in measured theory-relevant constructs
- 33
- 34 Item 16) Mediation analysis of constructs
- 35
- 36 Item 17) Results discussed in relation to theory
- 37
- 38 Item 18) Appropriate support for theory
- 39
- 40 Item 19) Results used to refine theory
- 41
- 42
- 43
- 44
- 45
- 46
- 47

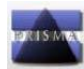

## PRISMA 2009 Checklist

| Section/topic                      | #  | Checklist item                                                                                                                                                                                                                                                                                              | Reported on page # |
|------------------------------------|----|-------------------------------------------------------------------------------------------------------------------------------------------------------------------------------------------------------------------------------------------------------------------------------------------------------------|--------------------|
| <b>TITLE</b>                       |    |                                                                                                                                                                                                                                                                                                             |                    |
| Title                              | 1  | Identify the report as a systematic review, meta-analysis, or both.                                                                                                                                                                                                                                         | 1                  |
| <b>ABSTRACT</b>                    |    |                                                                                                                                                                                                                                                                                                             |                    |
| Structured summary                 | 2  | Provide a structured summary including, as applicable: background; objectives; data sources; study eligibility criteria, participants, and interventions; study appraisal and synthesis methods; results; limitations; conclusions and implications of key findings; systematic review registration number. | 2                  |
| <b>INTRODUCTION</b>                |    |                                                                                                                                                                                                                                                                                                             |                    |
| Rationale                          | 3  | Describe the rationale for the review in the context of what is already known.                                                                                                                                                                                                                              | 5 & 6              |
| Objectives                         | 4  | Provide an explicit statement of questions being addressed with reference to participants, interventions, comparisons, outcomes, and study design (PICOS).                                                                                                                                                  | 7                  |
| <b>METHODS</b>                     |    |                                                                                                                                                                                                                                                                                                             |                    |
| Protocol and registration          | 5  | Indicate if a review protocol exists, if and where it can be accessed (e.g., Web address), and, if available, provide registration information including registration number.                                                                                                                               | N/A                |
| Eligibility criteria               | 6  | Specify study characteristics (e.g., PICOS, length of follow-up) and report characteristics (e.g., years considered, language, publication status) used as criteria for eligibility, giving rationale.                                                                                                      | 8 & 9              |
| Information sources                | 7  | Describe all information sources (e.g., databases with dates of coverage, contact with study authors to identify additional studies) in the search and date last searched.                                                                                                                                  | 9                  |
| Search                             | 8  | Present full electronic search strategy for at least one database, including any limits used, such that it could be repeated.                                                                                                                                                                               | Appendix A         |
| Study selection                    | 9  | State the process for selecting studies (i.e., screening, eligibility, included in systematic review, and, if applicable, included in the meta-analysis).                                                                                                                                                   | 9 & 10             |
| Data collection process            | 10 | Describe method of data extraction from reports (e.g., piloted forms, independently, in duplicate) and any processes for obtaining and confirming data from investigators.                                                                                                                                  | 10                 |
| Data items                         | 11 | List and define all variables for which data were sought (e.g., PICOS, funding sources) and any assumptions and simplifications made.                                                                                                                                                                       | 10 & 11            |
| Risk of bias in individual studies | 12 | Describe methods used for assessing risk of bias of individual studies (including specification of whether this was done at the study or outcome level), and how this information is to be used in any data synthesis.                                                                                      | 10                 |

|                               |    |                                                                                                                                                                                                          |                           |
|-------------------------------|----|----------------------------------------------------------------------------------------------------------------------------------------------------------------------------------------------------------|---------------------------|
| Summary measures              | 13 | State the principal summary measures (e.g., risk ratio, difference in means).                                                                                                                            | 11 & 12                   |
| Synthesis of results          | 14 | Describe the methods of handling data and combining results of studies, if done, including measures of consistency (e.g., $I^2$ ) for each meta-analysis.                                                | 11 & 12                   |
| Risk of bias across studies   | 15 | Specify any assessment of risk of bias that may affect the cumulative evidence (e.g., publication bias, selective reporting within studies).                                                             | 11 & 12                   |
| Additional analyses           | 16 | Describe methods of additional analyses (e.g., sensitivity or subgroup analyses, meta-regression), if done, indicating which were pre-specified.                                                         | 11 & 12                   |
| <b>RESULTS</b>                |    |                                                                                                                                                                                                          |                           |
| Study selection               | 17 | Give numbers of studies screened, assessed for eligibility, and included in the review, with reasons for exclusions at each stage, ideally with a flow diagram.                                          | 13 and figure 1           |
| Study characteristics         | 18 | For each study, present characteristics for which data were extracted (e.g., study size, PICOS, follow-up period) and provide the citations.                                                             | Supplementary table 1 & 2 |
| Risk of bias within studies   | 19 | Present data on risk of bias of each study and, if available, any outcome level assessment (see item 12).                                                                                                | Supplementary table 3     |
| Results of individual studies | 20 | For all outcomes considered (benefits or harms), present, for each study: (a) simple summary data for each intervention group (b) effect estimates and confidence intervals, ideally with a forest plot. | Appendix B                |
| Synthesis of results          | 21 | Present results of each meta-analysis done, including confidence intervals and measures of consistency.                                                                                                  | 20                        |
| Risk of bias across studies   | 22 | Present results of any assessment of risk of bias across studies (see Item 15).                                                                                                                          | 21 - 26                   |
| Additional analysis           | 23 | Give results of additional analyses, if done (e.g., sensitivity or subgroup analyses, meta-regression [see Item 16]).                                                                                    | 21 - 26                   |
| <b>DISCUSSION</b>             |    |                                                                                                                                                                                                          |                           |
| Summary of evidence           | 24 | Summarize the main findings including the strength of evidence for each main outcome; consider their relevance to key groups (e.g., healthcare providers, users, and policy makers).                     | 29                        |
| Limitations                   | 25 | Discuss limitations at study and outcome level (e.g., risk of bias), and at review-level (e.g., incomplete retrieval of identified research, reporting bias).                                            | 32                        |
| Conclusions                   | 26 | Provide a general interpretation of the results in the context of other evidence, and implications for future research.                                                                                  | 33                        |
| <b>FUNDING</b>                |    |                                                                                                                                                                                                          |                           |
| Funding                       | 27 | Describe sources of funding for the systematic review and other support (e.g., supply of data); role of funders for the systematic review.                                                               | 33                        |

1  
2  
3  
4  
5  
6  
7  
8  
9  
10  
11  
12  
13  
14  
15  
16  
17  
18  
19  
20  
21  
22  
23  
24  
25  
26  
27  
28  
29  
30  
31  
32  
33  
34  
35  
36  
37  
38  
39  
40  
41  
42  
43  
44  
45  
46  
47

*From:* Moher D, Liberati A, Tetzlaff J, Altman DG, The PRISMA Group (2009). Preferred Reporting Items for Systematic Reviews and Meta-Analyses: The PRISMA Statement. PLoS Med 6(7): e1000097. doi:10.1371/journal.pmed100009

For peer review only

1  
2  
3  
4  
5  
6  
7  
8  
9  
10  
11  
12  
13  
14  
15  
16  
17  
18  
19  
20  
21  
22  
23  
24  
25  
26  
27  
28  
29  
30  
31  
32  
33  
34  
35  
36  
37  
38  
39  
40  
41  
42  
43  
44  
45  
46  
47

For peer review only
