# Supplementary material for: Multiple health behaviour change interventions for primary prevention of cardiovascular disease in primary care: systematic review and meta-analysis
Source: PubMed Central journal article supplement (PMC5734412; doi:10.1136/bmjopen-2016-015375), 2017-06-15
Supplement: bmjopen-2016-015375supp001.pdf [file bmjopen-2016-015375supp001.pdf]

**Supplementary table 1: Trial characteristics of included studies.**

| Study (Year)                                   | Country          | Number of Participants | Selection criteria                                                                                                                                                                                                                  | Targeted behaviours                       | Follow-up duration | Intervention reported outcomes                                    |
|------------------------------------------------|------------------|------------------------|-------------------------------------------------------------------------------------------------------------------------------------------------------------------------------------------------------------------------------------|-------------------------------------------|--------------------|-------------------------------------------------------------------|
| <b>Kranjčević, et al.</b> <sup>1</sup>         | Croatia          | 1957                   | Men and women, aged ≥40.                                                                                                                                                                                                            | Diet and PA.                              | 18 months          | CVD-risk, weight, BP, cholesterol, smoking, alcohol and PA.       |
| <b>Vetter, et al.</b> <sup>2</sup>             | United States    | 390                    | Men and women, aged ≥21 years, BMI= 30-50kg/m <sup>2</sup> , elevated waist circumference.                                                                                                                                          | Diet and PA.                              | 2 years            | Weight, BP and cholesterol.                                       |
| <b>Lakerveld, et al.</b> <sup>3</sup>          | Netherlands      | 622                    | Men and women, aged: 30-50 years.                                                                                                                                                                                                   | Diet, PA and smoking.                     | 12 months          | CVD-risk, smoking, diet and PA.                                   |
| <b>Hardcastle, et al.</b> <sup>4</sup>         | United Kingdom   | 334                    | Men and women, aged 18-65 years and have at least one CVD risk factor.                                                                                                                                                              | Diet and PA.                              | 18 months          | Weight, BP, cholesterol, diet and PA.                             |
| <b>Tiessen, et al.</b> <sup>5</sup>            | Netherlands      | 201                    | Men aged: 50-75 years old and women aged: 55-75 years and CVD-risk (SCORE) ≥ 5%.                                                                                                                                                    | PA, diet and smoking.                     | 12 months          | CVD-risk, weight, BP, cholesterol, smoking and PA.                |
| <b>Parra-Medina, et al.</b> <sup>6</sup>       | United States    | 266                    | African-American women, aged ≥35 years, baseline BP <160/95.                                                                                                                                                                        | PA and diet.                              | 12 months          | Diet and PA.                                                      |
| <b>Drevenhorn, et al.</b> <sup>7</sup>         | Sweden           | 153                    | Hypertensive patients, men and women aged <75 years, elevated BP, BMI ≥ 25, serum cholesterol ≥ 6.5 and/or serum triglycerides ≥ 2.3 and not reporting regular PA.                                                                  | Smoking, alcohol, weight, PA and stress   | 2 years            | Weight, BP, cholesterol, alcohol and PA.                          |
| <b>Brett, et al.</b> <sup>8</sup>              | Australia        | 1200                   | Men and women aged 40-80 years, without a history of CVD.                                                                                                                                                                           | Diet, PA and smoking.                     | 12 months          | CVD-risk, weight, BP and cholesterol.                             |
| <b>Harris, et al.</b> <sup>9</sup>             | Australia        | 814                    | Men and women, aged 40-55 years with recorded diagnosis of hypertension and/or hyperlipidaemia or aged 56-64 years.                                                                                                                 | Diet, PA, smoking and alcohol.            | 12 months          | CVD-risk, weight, BP, cholesterol, smoking, alcohol, diet and PA. |
| <b>Mendis, et al.</b> <sup>10</sup>            | China<br>Nigeria | 1209<br>1188           | Men and women aged 30-70 years with SBP in the range (140-179 mmHg).                                                                                                                                                                | Smoking cessation, PA and diet.           | 12 months          | Weight, BP, smoking and diet.                                     |
| <b>Koelwijn-van Loon, et al.</b> <sup>11</sup> | Netherlands      | 615                    | One or more of the following: BP ≥ 140 or on treatment for high BP; total cholesterol ≥ 6.5 or on treatment for high cholesterol; smoker aged ≥ 50 years (men) or ≥ 55 years (women); diabetes; a family history of CVD; and obese. | Smoking status, diet, PA and alcohol use. | 12 months          | CVD-risk, BP, cholesterol, smoking, diet and PA.                  |
| <b>Eriksson, et al.</b> <sup>12</sup>          | Sweden           | 151                    | Men and women aged 18–65 years with hypertension, dyslipidaemia, type 2 diabetes or obesity.                                                                                                                                        | Diet and PA.                              | 3 years            | Weight, BP, cholesterol, smoking and PA.                          |
| <b>Phelan, et al.</b> <sup>13</sup>            | United States    | 224                    | Men and women aged 18–65 years and BMI of 30–45 kg/m <sup>2</sup> .                                                                                                                                                                 | Diet and PA.                              | 12 months          | Weight, BP, cholesterol and diet.                                 |

|                                          |                |                      |                                                                                                                           |                                                                          |           |                                                                   |
|------------------------------------------|----------------|----------------------|---------------------------------------------------------------------------------------------------------------------------|--------------------------------------------------------------------------|-----------|-------------------------------------------------------------------|
| <b>Harting, et al.</b> <sup>14</sup>     | Netherlands    | 1300                 | Men and women who have a greater than 20% risk (Framingham) of incurring a CVD event within 10 years.                     | Diet, PA and smoking.                                                    | 18 months | Smoking, diet and PA.                                             |
| <b>Korhonen, et al.</b> <sup>15</sup>    | Finland        | 715                  | Men and women aged 25–74 years, with systolic BP 140–179 and/or diastolic BP 90–109 and/or on treatment for hypertension. | Diet and alcohol (also PA and smoking).                                  | 24 months | Weight, BP, cholesterol, alcohol, diet and PA.                    |
| <b>Baron, et al.</b> <sup>16</sup>       | United Kingdom | 368                  | Men and women aged 25 – 60 years.                                                                                         | Diet mainly, but changes in PA, alcohol and smoking were also mentioned. | 12 months | Cholesterol and diet.                                             |
| <b>Knutsen and Knutsen</b> <sup>17</sup> | Norway         | 1373 men, 1143 wives | Men aged 20 – 54 years and women aged 20-49 years, with no known CHD at baseline.                                         | Diet changes, PA and smoking cessation.                                  | 6 years   | CVD-risk, weight, BP, cholesterol, smoking and PA.                |
| <b>Nilsson, et al.</b> <sup>18</sup>     | Sweden         | 86                   | Men and women, born during the period 1925 – 1952, treated hypertensives.                                                 | Diet, smoking, PA and alcohol.                                           | 12 months | Weight, BP, cholesterol, smoking and diet.                        |
| <b>Wood, et al.</b> <sup>19</sup>        | United Kingdom | 7460 men, 5012 women | Men aged 40-59 and their families.                                                                                        | Smoking, weight, diet, alcohol, and PA.                                  | 12 months | CVD-risk, weight, BP, cholesterol and smoking.                    |
| <b>OXCHECK Study Group</b> <sup>20</sup> | United Kingdom | 5559                 | Men and women aged 35-64.                                                                                                 | Diet, smoking and PA.                                                    | 3 years   | CVD-risk, weight, BP, cholesterol, alcohol, diet, PA and smoking. |
| <b>Lindholm, et al.</b> <sup>21</sup>    | Sweden         | 681                  | Men and women aged 30-59 years, had a moderate hyperlipidaemia, and at least two CVD risk factors.                        | Diet, smoking and PA.                                                    | 18 months | CVD-risk, weight, BP, cholesterol, PA and smoking.                |
| <b>Meland, et al.</b> <sup>22</sup>      | Norway         | 127                  | Men aged 30 to 59 years.                                                                                                  | Diet, smoking and PA.                                                    | 12 months | CVD-risk, BP, cholesterol, PA and smoking.                        |
| <b>Avram, et al.</b> <sup>23</sup>       | Romania        | 253                  | Men and women under 80 years, without history of CVD but defined as high risk individuals.                                | Diet and PA.                                                             | 18 months | Weight, alcohol, diet and PA.                                     |
| <b>Steptoe, et al.</b> <sup>24</sup>     | United Kingdom | 883                  | Men and women aged 18 – 69, total cholesterol of 6.5-9; smoker, BMI of 25-35 and lack of regular PA.                      | Smoking, diet and PA.                                                    | 12 months | Weight, BP, cholesterol, diet and PA.                             |
| <b>Sartorelli, et al.</b> <sup>25</sup>  | Brazil         | 104                  | Men and women aged 30-65 years, body mass index of 24-35 kg/m <sup>2</sup> , and non-diabetic.                            | Diet and PA.                                                             | 12 months | Weight, BP, cholesterol, diet and PA.                             |
| <b>Ma, et al.</b> <sup>26</sup>          | United States  | 419                  | Men and women aged 35 to 85 years, had moderately to severely elevated levels of major modifiable CVD risk factors.       | PA, diet and stress reduction.                                           | 15 months | CVD-risk, weight, BP and cholesterol.                             |
| <b>Tibblin and Åberg</b> <sup>27</sup>   | Sweden         | 400                  | Men and women aged 30 - 69 years, on hypertensive drugs                                                                   | Diet, PA and stress management.                                          | 12 months | Weight, BP and cholesterol.                                       |

|                                                |                |     |                                                                                                                                                                                                                                                                                                      |                                           |           |                                                          |
|------------------------------------------------|----------------|-----|------------------------------------------------------------------------------------------------------------------------------------------------------------------------------------------------------------------------------------------------------------------------------------------------------|-------------------------------------------|-----------|----------------------------------------------------------|
| <b>Gomez-Huelgas et al (2015)<sup>28</sup></b> | Spain          | 601 | Men and women aged 18-80 years, with metabolic syndrome.                                                                                                                                                                                                                                             | Diet and PA.                              | 3 years   | Weight, BP, cholesterol, diet and PA.                    |
| <b>Wennehorst et al.<sup>29</sup></b>          | Germany        | 83  | Men and women aged 18-80 years who had either prediabetes, type 2 diabetes, or were at risk of developing diabetes and/or cardiovascular diseases.                                                                                                                                                   | Diet and PA.                              | 12 months | Weight, BP, cholesterol.                                 |
| <b>Salisbury et al.<sup>30</sup></b>           | United Kingdom | 641 | Men and women aged between 40 and 74 years, had a high risk of a cardiovascular event in the next 10 years, and had one or more of the following modifiable risk factors (systolic blood pressure $\geq$ 140 mm Hg, body mass index $\geq$ 30, being a current smoker, or any combination of these). | Smoking status, diet, PA and alcohol use. | 12 months | CVD-risk, weight, BP, cholesterol, diet, PA and smoking. |
| <b>Duncan et al.<sup>31</sup></b>              | New Zealand    | 320 | Adults aged 35 to 65 years, a 5-year CVD risk of at least 7%, and/or a BMI of at least 33 kg/m <sup>2</sup> for participants younger than 50 years                                                                                                                                                   | Diet and PA.                              | 12 months | CVD-risk, weight, BP, cholesterol, diet and PA.          |

Note: BMI: body mass index, PA: physical activity, BP: blood pressure, CVD: cardiovascular diseases

## References:

1. Kranjčević K, Marković BB, Lalić DI, et al. Is a targeted and planned GP intervention effective in cardiovascular disease prevention? A randomized controlled trial. *Medical science monitor: international medical journal of experimental and clinical research* 2014;**20**:1180.
2. Vetter ML, Wadden TA, Chittams J, et al. Effect of lifestyle intervention on cardiometabolic risk factors: results of the POWER-UP trial. *International Journal of Obesity* 2013;**37**:S19-S24.
3. Lakerveld J, Bot SD, Chinapaw MJ, et al. Motivational interviewing and problem solving treatment to reduce type 2 diabetes and cardiovascular disease risk in real life: a randomized controlled trial. *Int J Behav Nutr Phys Act* 2013;**10**(47):10.1186.
4. Hardcastle SJ, Taylor AH, Bailey MP, et al. Effectiveness of a motivational interviewing intervention on weight loss, physical activity and cardiovascular disease risk factors: a randomised controlled trial with a 12-month post-intervention follow-up. *Int J Behav Nutr Phys Act* 2013;**10**(40):1-16.
5. Tiessen AH, Smit AJ, Broer J, et al. Randomized controlled trial on cardiovascular risk management by practice nurses supported by self-monitoring in primary care. *BMC family practice* 2012;**13**(1):1.
6. Parra-Medina D, Wilcox S, Salinas J, et al. Results of the Heart Healthy and Ethnically Relevant Lifestyle trial: a cardiovascular risk reduction intervention for African American women attending community health centers. *American journal of public health* 2011;**101**(10):1914-21.
7. Drevenhorn E, Bengtson A, Nilsson PM, et al. Consultation training of nurses for cardiovascular prevention—a randomized study of 2 years duration. *Blood pressure* 2012;**21**(5):293-99.
8. Brett T, Arnold-Reed D, Phan C, et al. The Fremantle Primary Prevention Study: a multicentre randomised trial of absolute cardiovascular risk reduction. *Br J Gen Pract* 2012;**62**(594):e22-e28.
9. Harris MF, Fanaian M, Jayasinghe UW, et al. A cluster randomised controlled trial of vascular risk factor management in general practice. *Med J Aust* 2012;**197**(7):387-93.
10. Mendis S, Johnston SC, Fan W, et al. Cardiovascular risk management and its impact on hypertension control in primary care in low-resource settings: a cluster-randomized trial. *Bulletin of the World Health Organization* 2010;**88**(6):412-19.
11. Koelewijn-van Loon MS, van der Weijden T, van Steenkiste B, et al. Involving patients in cardiovascular risk management with nurse-led clinics: a cluster randomized controlled trial. *Canadian Medical Association Journal* 2009;**181**(12):E267-E74.
12. Eriksson MK, Franks PW, Eliasson M. A 3-year randomized trial of lifestyle intervention for cardiovascular risk reduction in the primary care setting: the Swedish Björknäs study. *PloS one* 2009;**4**(4):e5195.
13. Phelan S, Wadden T, Berkowitz R, et al. Impact of weight loss on the metabolic syndrome. *International journal of obesity* 2007;**31**(9):1442-48.
14. Harting J, van Assema P, van Limpt P, et al. Cardiovascular prevention in the Hartsлаг Limburg project: effects of a high-risk approach on behavioral risk factors in a general practice population. *Preventive medicine* 2006;**43**(5):372-78.
15. Korhonen M, Kastarinen M, Uusitupa M, et al. The effect of intensified diet counseling on the diet of hypertensive subjects in primary health care: a 2-year open randomized controlled trial of lifestyle intervention against hypertension in eastern Finland. *Preventive medicine* 2003;**36**(1):8-16.

16. Baron JA, Gleason R, Crowe B, et al. Preliminary trial of the effect of general practice based nutritional advice. *Br J Gen Pract* 1990;**40**(333):137-41.
17. Knutsen SF, Knutsen R. The Tromsø Survey: the Family Intervention study—the effect of intervention on some coronary risk factors and dietary habits, a 6-year follow-up. *Preventive medicine* 1991;**20**(2):197-212.
18. Nilsson PM, Lindholm LH, Scherstén BF. Life style changes improve insulin resistance in hyperinsulinaemic subjects: a one-year intervention study of hypertensives and normotensives in Dalby. *Journal of hypertension* 1992;**10**(9):1071-78.
19. Wood D, Kinmonth A, Davies G, et al. Randomised controlled trial evaluating cardiovascular screening and intervention in general practice: principal results of British family heart study. *Bmj* 1994;**308**(6924):313-20.
20. OXCHECK. Effectiveness of health checks conducted by nurses in primary care: final results of the OXCHECK study. *BMJ: British Medical Journal* 1995:1099-104.
21. Lindholm LH, Ekblom T, Dash C, et al. The impact of health care advice given in primary care on cardiovascular risk. *BMJ* 1995;**310**(6987):1105-09.
22. Meland E, Lærum E, Ulvik RJ. Effectiveness of two preventive interventions for coronary heart disease in primary care. *Scandinavian journal of primary health care* 1997;**15**(1):57-63.
23. Avram C, Iurciuc M, Craciun L, et al. Dietary and physical activity counseling in high-risk asymptomatic patients with metabolic syndrome—A primary care intervention. *Journal of Food, Agriculture & Environment* 2011;**9**(3&4):16-19.
24. Steptoe A, Day S, Doherty S, et al. Behavioural counselling in general practice for the promotion of healthy behaviour among adults at increased risk of coronary heart disease: randomised trialCommentary: Treatment allocation by the method of minimisation. *Bmj* 1999;**319**(7215):943-48.
25. Sartorelli DS, Sciarra EC, Franco LJ, et al. Beneficial effects of short-term nutritional counselling at the primary health-care level among Brazilian adults. *Public health nutrition* 2005;**8**(07):820-25.
26. Ma J, Berra K, Haskell WL, et al. Case management to reduce risk of cardiovascular disease in a county health care system. *Archives of internal medicine* 2009;**169**(21):1988-95.
27. Tibblin G, Åberg H. NON-PHARMACOLOGICAL TREATMENT OF HYPERTENSION IN TWO STEPS-1 YEAR REPORT FROM EIGHT HEALTH CENTRES. *Acta Medica Scandinavica* 1986;**220**(S714):105-12.
28. Gomez-Huelgas R, Jansen-Chaparro S, Baca-Osorio AJ, et al. Effects of a long-term lifestyle intervention program with Mediterranean diet and exercise for the management of patients with metabolic syndrome in a primary care setting. *European Journal of Internal Medicine* 2015;**26**(5):317-23.
29. Wennehorst K, Mildenstein K, Saliger B, et al. A comprehensive lifestyle intervention to prevent type 2 diabetes and cardiovascular diseases: The german chip trial. *Prevention Science* 2016:No Pagination Specified.
30. Salisbury C, O'Cathain A, Thomas C, et al. Telehealth for patients at high risk of cardiovascular disease: Pragmatic randomised controlled trial. *BMJ (Online)* 2016;**353** (no pagination)(i2647).
31. Duncan S, Goodyear-Smith F, McPhee J, et al. Family-centered brief intervention for reducing obesity and cardiovascular disease risk: A randomized controlled trial. *Obesity* 2016;**24**(11):2311-18.
