# Supplementary material for: Multiple health behaviour change interventions for primary prevention of cardiovascular disease in primary care: systematic review and meta-analysis
Source: PubMed Central journal article supplement (PMC5734412; doi:10.1136/bmjopen-2016-015375), 2017-06-15
Supplement: bmjopen-2016-015375supp002.pdf [file bmjopen-2016-015375supp002.pdf]

**Supplementary table 2:** Intervention components and behaviour change techniques employed.

| Study (Year)                                    | Study groups   | Who delivered it                     | BCTs <sup>1</sup>                                | Mode of delivery                                           | No. of sessions | Duration of sessions (in mins)                                     |
|-------------------------------------------------|----------------|--------------------------------------|--------------------------------------------------|------------------------------------------------------------|-----------------|--------------------------------------------------------------------|
| <b>Kranjčević, et al.</b> <sup>1</sup>          | Intervention   | GPs                                  | 1.3, 2.1, 9.1                                    | Face to face and written materials                         | 5               | Unclear                                                            |
|                                                 | Control        |                                      | Unclear                                          | Unclear                                                    | Unclear         | Unclear                                                            |
| <b>Vetter, et al.</b> <sup>2</sup>              | Intervention 1 | PCP and lifestyle coach.             | 1.1, 1.5, 2.3, 8.7, 9.1                          | Face to face and written materials                         | 32              | Visits: 5-7 mins, counselling: 10-15 mins.                         |
|                                                 | Intervention 2 |                                      | 1.1, 1.5, 2.3, 8.7, 9.1, 11.1                    | Face to face and written materials                         | 32              | Visits: 5-7 mins, counselling: 10-15 mins.                         |
|                                                 | Control        |                                      | 1.7                                              | Face to face                                               | 8               | Visits: 5-7 mins.                                                  |
| <b>Lakerveld, et al.</b> <sup>3</sup>           | Intervention   | Nurse                                | 1.2, 1.6                                         | Face to face and phone sessions.                           | 9               | Face to face sessions: 30 mins.                                    |
|                                                 | Control        |                                      | 4.1, 5.1                                         | Written materials.                                         | Unclear         | Unclear                                                            |
| <b>Hardcastle, et al.</b> <sup>4</sup>          | Intervention   | PA specialist and dietician          | 1.1, 1.5, 9.2                                    | Face to face.                                              | 5               | 20-30 mins.                                                        |
|                                                 | Control        |                                      | 5.1                                              | Written materials.                                         | Unclear         | Unclear                                                            |
| <b>Tiessen, et al.</b> <sup>5</sup>             | Intervention   | Practice nurses.                     | 2.2, 2.3, 2.4, 5.1                               | Face to face.                                              | 7               | First session: 20 min, other sessions based on patient preference. |
|                                                 | Control        |                                      | 5.1                                              | Face to face and written materials.                        | One             | Unclear.                                                           |
| <b>Parra-Medina, et al.</b> <sup>6</sup>        | Intervention   | PCP, health educators and nurses     | 1.1, 1.2.                                        | Face to face and telephone sessions and written materials. | Up to 15        | First session: 60 mins. Following sessions: 20 mins.               |
|                                                 | Control        |                                      | 1.1                                              | Face to face and written materials.                        | One             | 5-10 mins.                                                         |
| <b>Drevenhorn, et al.</b> <sup>7</sup>          | Intervention   | Nurses                               | 1.1, 1.5, 5.3, 9.2, 10.4, 11.2                   | Face to face                                               | Unclear         | Unclear                                                            |
|                                                 | Control        |                                      | Unclear                                          | Unclear                                                    | Unclear         | Unclear                                                            |
| <b>Brett, et al.</b> <sup>8</sup>               | Intervention   | GPs                                  | 1.1, 1.3, 2.7                                    | Face to face                                               | 5               | Unclear                                                            |
|                                                 | Control        |                                      | 1.1, 1.3, 2.7                                    | Face to face                                               | 2               | Unclear                                                            |
| <b>Harris, et al.</b> <sup>9</sup>              | Intervention   | Health practitioner, dietitian or PT | 1.1, 1.2, 2.3, 4.1, 6.1, 9.1                     | Face to face                                               | 6               | 90 mins/ session.                                                  |
|                                                 | Control        |                                      | Unclear                                          | Unclear                                                    | Unclear         | Unclear                                                            |
| <b>Mendis, et al.</b> <sup>10</sup>             | Intervention   | Health-care workers                  | 2.6, 4.1                                         | Face to face and written materials                         | 4               | Unclear                                                            |
|                                                 | Control        |                                      | Unclear                                          | Unclear                                                    | Unclear         | Unclear                                                            |
| <b>Koelewijn-van Loon, et al.</b> <sup>11</sup> | Intervention   | Nurses                               | 1.1, 1.2, 1.4, 1.5, 5.1, 9.2                     | Face to face and telephone sessions                        | 3               | Face to face: 10-20 mins, telephone: 10 mins.                      |
|                                                 | Control        |                                      | 5.1                                              | Face to face                                               | One             | Unclear                                                            |
| <b>Eriksson, et al.</b> <sup>12</sup>           | Intervention   | Dietician, PT and assistants.        | 1.1, 1.2, 1.3, 1.4, 4.1, 5.1, 8.1, 8.7, 9.1, 9.2 | Face to face                                               | 56              | Unclear.                                                           |
|                                                 | Control        |                                      | 9.1                                              | Face to face and written materials.                        | One             | Unclear                                                            |

|                                          |                |                                   |                                    |                                                         |         |                                                             |
|------------------------------------------|----------------|-----------------------------------|------------------------------------|---------------------------------------------------------|---------|-------------------------------------------------------------|
| <b>Phelan, et al.</b> <sup>13</sup>      | Intervention 1 | PCP                               | 2.3, 11.1.                         | Face to face and written materials.                     | 8       | 5-10 mins.                                                  |
|                                          | Intervention 2 | Psychologist                      | 1.5, 2.3, 9.1                      | Group sessions.                                         | 29      | 90 mins                                                     |
|                                          | Intervention 3 | Psychologist, PCP                 | 1.5, 2.3, 9.1, 11.1                | Face to face, group sessions and written material.      | 37      | Face to face: 5-10 mins, group sessions: 90 mins.           |
|                                          | Intervention 4 | PCP                               | 1.5, 2.3, 9.1, 11.1                | Face to face and written materials.                     | 8       | 5-10 mins.                                                  |
| <b>Harting, et al.</b> <sup>14</sup>     | Intervention   | Practice assistant and dietician. | 1.1, 1.4, 9.1, 11.1                | Face to face, telephone sessions and written materials. | Unclear | Unclear                                                     |
|                                          | Control        |                                   | Unclear                            | Unclear                                                 | Unclear | Unclear                                                     |
| <b>Korhonen, et al.</b> <sup>15</sup>    | Intervention   | Healthcare centre personnel.      | 1.1, 1.3, 1.4, 2.3, 2.5,4.1, 9.1   | Face to face.                                           | 7       | Unclear                                                     |
|                                          | Control        |                                   | Unclear                            | Unclear                                                 | Unclear | Unclear                                                     |
| <b>Baron, et al.</b> <sup>16</sup>       | Intervention   | Nurse                             | 5.1, 9.1                           | Face to face, group sessions and written material.      | Unclear | 30 mins.                                                    |
|                                          | Control        |                                   | Unclear                            | Unclear                                                 | Unclear | Unclear                                                     |
| <b>Knutsen and Knutsen</b> <sup>17</sup> | Intervention   | Physicians and dieticians         | 1.1, 4.1, 5.1, 6.1, 9.1            | Face to face and telephone sessions.                    | 8       | Unclear                                                     |
|                                          | Control        |                                   | Unclear                            | Unclear                                                 | Unclear | Unclear                                                     |
| <b>Nilsson, et al.</b> <sup>18</sup>     | Intervention   | Nurse, dietician or PT.           | 1.1, 2.2, 3.1, 4.1, 6.1, 9.1, 12.5 | Face to face, group sessions and videotapes.            | Unclear | Unclear                                                     |
|                                          | Control        |                                   | 2.2, 5.1                           | Face to face                                            | One     | Unclear                                                     |
| <b>Wood, et al.</b> <sup>19</sup>        | Intervention   | Nurses                            | 1.1, 2.7, 5.1, 6.2, 9.1            | Face to face and written materials                      | Unclear | First session: 90 mins.                                     |
|                                          | Control        |                                   | 9.1                                | Face to face                                            | One     | 45 mins                                                     |
| <b>OXCHECK Study Group</b> <sup>20</sup> | Intervention   | Nurses                            | 1.3, 2.7, 9.1,                     | Face to face                                            | Unclear | Initial session: 45-60 mins, following sessions:10-20 mins. |
|                                          | Control        |                                   | Unclear                            | None                                                    | None    | None                                                        |
| <b>Lindholm, et al.</b> <sup>21</sup>    | Intervention   | Doctors and nurses                | 2.3, 4.1, 5.1, 6.2, 9.1            | Face to face, group sessions and written materials      | 11      | Five group sessions: 90 mins, one group session: all day.   |
|                                          | Control        |                                   | 9.1                                | Face to face and written materials                      | 5       | Unclear                                                     |
| <b>Meland, et al.</b> <sup>22</sup>      | Intervention   | GPs                               | 1.8, 2.3, 8.7, 9.1, 11.2           | Face to face and written materials                      | 4       | Unclear                                                     |
|                                          | Control        |                                   | 9.1                                | Face to face and written materials                      | 4       | Unclear                                                     |
| <b>Avram, et al.</b> <sup>23</sup>       | Intervention   | GPs                               | 1.1, 9.1                           | Face to face and telephone sessions                     | 21      | Face to face sessions:30 mins.                              |
|                                          | Control        |                                   | Unclear                            | Written materials                                       | None    | None                                                        |
| <b>Steptoe, et al.</b> <sup>24</sup>     | Intervention   | Nurses                            | 1.1, 1.4, 9.1, 11.1                | Face to face and telephone sessions                     | 2-3     | Face to face sessions:20 mins.                              |
|                                          | Control        |                                   | Unclear                            | Unclear                                                 | Unclear | Unclear                                                     |
| <b>Sartorelli, et al.</b> <sup>25</sup>  | Intervention   | Nutritionist                      | 1.1, 1.4, 9.1                      | Face to face and group sessions and written materials.  | 4       | Unclear                                                     |
|                                          | Control        |                                   | Unclear                            | Group session and written materials                     | 1       | Unclear                                                     |

|                                           |              |                            |                                    |                                                                       |         |                                                      |
|-------------------------------------------|--------------|----------------------------|------------------------------------|-----------------------------------------------------------------------|---------|------------------------------------------------------|
| <b>Ma, et al.</b> <sup>26</sup>           | Intervention | Nurses and dietitians      | 1.1, 1.2, 1.7, 9.1, 11.1, 11.2     | Face to face                                                          | 8-10    | 30-60 mins                                           |
|                                           | Control      |                            | Unclear                            | Unclear                                                               | Unclear | Unclear                                              |
| <b>Tibblin and Åberg</b> <sup>27</sup>    | Intervention | Nurses and physicians      | 2.5, 6.1, 9.1                      | Face to face, group sessions and videotapes and audiotapes.           | 15      | Unclear                                              |
|                                           | Control      |                            | 2.5, 9.1                           | Face to face                                                          | 15      | Unclear                                              |
| <b>Gomez-Huelgas et al.</b> <sup>28</sup> | Intervention | Nurses and physicians      | 1.3, 1.4, 2.5, 4.1, 9.1            | Face to face, group sessions and written materials.                   | 27      | Health assessment: 15 mins, nursing visits: 30 mins. |
|                                           | Control      |                            | 2.5, 9.1                           | Face to face and written materials                                    | 24      | 10 mins.                                             |
| <b>Wennehorst et al.</b> <sup>29</sup>    | Intervention | Physician and nutritionist | 1.4, 3.1, 4.1, 9.1, 11.2.          | Face to face, group sessions and written materials.                   | 16      | 2.5 hrs/ session.                                    |
|                                           | Control      |                            | Unclear                            | Unclear                                                               | Unclear | Unclear                                              |
| <b>Salisbury et al.</b> <sup>30</sup>     | Intervention | Health advisors            | 1.1, 1.6, 2.4, 5.1, 9.1, 11.1.     | Computerised behavioural management programme and telephone sessions. | 12      | Telephone sessions: an average of 18 mins/session.   |
|                                           | Control      |                            | Unclear                            | Unclear                                                               | Unclear | Unclear                                              |
| <b>Duncan et al.</b> <sup>31</sup>        | Intervention | Trained health promoter    | 1.1, 1.4, 1.5, 2.3, 2.6, 3.1, 8.7. | Face to face group sessions and written materials.                    | 5       | 60mins/ session.                                     |
|                                           | Control      |                            | 2.6                                | Face to face                                                          | unclear | Unclear                                              |

<sup>1</sup> as coded in Michie, Richardson et al.<sup>32</sup> taxonomy of behaviour change technique

Note: 1.1 Goal setting (behaviour); 1.2 Problem solving; 1.3 Goal setting (outcome); 1.4 Action planning; 1.5 Review behaviour goals(s); 1.6 Discrepancy between current behaviour and goal; 1.7 Review outcome goal(s); 1.8 Behavioural contract; 2.1 Monitoring of behaviour by others without feedback; 2.2 Feedback on behaviour; 2.3 self-monitoring of behaviour; 2.4 Self-monitoring of outcome(s) of behaviour; 2.5 Monitoring of outcomes of behaviour without feedback; 2.6 Biofeedback; 2.7 Feedback on outcome(s) of behaviour; 3.1 Social support (unspecified); 4.1 Instructions on how to perform a behaviour; 5.1 Information about health consequences; 5.3 Information about social and environmental consequences; 6.1 Demonstration of the behaviour; 6.2 Social comparison; 8.1 Behavioural practice/rehearsal; 8.7 Graded tasks; 9.1 Credible source; 9.2 Pros and cons; 10.4 Social reward; 11.1 Pharmacological support; 11.2 Reduce negative emotions; 12.5 Adding objects to the environment; PT Physiotherapist, PA Physical activity

## References:

1. Kranjčević K, Marković BB, Lalić DI, et al. Is a targeted and planned GP intervention effective in cardiovascular disease prevention? A randomized controlled trial. *Medical science monitor: international medical journal of experimental and clinical research* 2014;**20**:1180.
2. Vetter ML, Wadden TA, Chittams J, et al. Effect of lifestyle intervention on cardiometabolic risk factors: results of the POWER-UP trial. *International Journal of Obesity* 2013;**37**:S19-S24.
3. Lakerveld J, Bot SD, Chinapaw MJ, et al. Motivational interviewing and problem solving treatment to reduce type 2 diabetes and cardiovascular disease risk in real life: a randomized controlled trial. *Int J Behav Nutr Phys Act* 2013;**10**(47):10.1186.
4. Hardcastle SJ, Taylor AH, Bailey MP, et al. Effectiveness of a motivational interviewing intervention on weight loss, physical activity and cardiovascular disease risk factors: a randomised controlled trial with a 12-month post-intervention follow-up. *Int J Behav Nutr Phys Act* 2013;**10**(40):1-16.
5. Tiessen AH, Smit AJ, Broer J, et al. Randomized controlled trial on cardiovascular risk management by practice nurses supported by self-monitoring in primary care. *BMC family practice* 2012;**13**(1):1.
6. Parra-Medina D, Wilcox S, Salinas J, et al. Results of the Heart Healthy and Ethnically Relevant Lifestyle trial: a cardiovascular risk reduction intervention for African American women attending community health centers. *American journal of public health* 2011;**101**(10):1914-21.
7. Drevenhorn E, Bengtson A, Nilsson PM, et al. Consultation training of nurses for cardiovascular prevention—a randomized study of 2 years duration. *Blood pressure* 2012;**21**(5):293-99.
8. Brett T, Arnold-Reed D, Phan C, et al. The Fremantle Primary Prevention Study: a multicentre randomised trial of absolute cardiovascular risk reduction. *Br J Gen Pract* 2012;**62**(594):e22-e28.
9. Harris MF, Fanaian M, Jayasinghe UW, et al. A cluster randomised controlled trial of vascular risk factor management in general practice. *Med J Aust* 2012;**197**(7):387-93.
10. Mendis S, Johnston SC, Fan W, et al. Cardiovascular risk management and its impact on hypertension control in primary care in low-resource settings: a cluster-randomized trial. *Bulletin of the World Health Organization* 2010;**88**(6):412-19.
11. Koelewijn-van Loon MS, van der Weijden T, van Steenkiste B, et al. Involving patients in cardiovascular risk management with nurse-led clinics: a cluster randomized controlled trial. *Canadian Medical Association Journal* 2009;**181**(12):E267-E74.
12. Eriksson MK, Franks PW, Eliasson M. A 3-year randomized trial of lifestyle intervention for cardiovascular risk reduction in the primary care setting: the Swedish Björknäs study. *PloS one* 2009;**4**(4):e5195.
13. Phelan S, Wadden T, Berkowitz R, et al. Impact of weight loss on the metabolic syndrome. *International journal of obesity* 2007;**31**(9):1442-48.
14. Harting J, van Assema P, van Limpt P, et al. Cardiovascular prevention in the Harts slag Limburg project: effects of a high-risk approach on behavioral risk factors in a general practice population. *Preventive medicine* 2006;**43**(5):372-78.
15. Korhonen M, Kastarinen M, Uusitupa M, et al. The effect of intensified diet counseling on the diet of hypertensive subjects in primary health care: a 2-year open randomized controlled trial of lifestyle intervention against hypertension in eastern Finland. *Preventive medicine* 2003;**36**(1):8-16.
16. Baron JA, Gleason R, Crowe B, et al. Preliminary trial of the effect of general practice based nutritional advice. *Br J Gen Pract* 1990;**40**(333):137-41.

17. Knutsen SF, Knutsen R. The Tromsø Survey: the Family Intervention study—the effect of intervention on some coronary risk factors and dietary habits, a 6-year follow-up. *Preventive medicine* 1991;**20**(2):197-212.
18. Nilsson PM, Lindholm LH, Scherstén BF. Life style changes improve insulin resistance in hyperinsulinaemic subjects: a one-year intervention study of hypertensives and normotensives in Dalby. *Journal of hypertension* 1992;**10**(9):1071-78.
19. Wood D, Kinmonth A, Davies G, et al. Randomised controlled trial evaluating cardiovascular screening and intervention in general practice: principal results of British family heart study. *Bmj* 1994;**308**(6924):313-20.
20. OXCHECK. Effectiveness of health checks conducted by nurses in primary care: final results of the OXCHECK study. *BMJ: British Medical Journal* 1995:1099-104.
21. Lindholm LH, Ekblom T, Dash C, et al. The impact of health care advice given in primary care on cardiovascular risk. *BMJ* 1995;**310**(6987):1105-09.
22. Meland E, Lærum E, Ulvik RJ. Effectiveness of two preventive interventions for coronary heart disease in primary care. *Scandinavian journal of primary health care* 1997;**15**(1):57-63.
23. Avram C, Iurciuc M, Craciun L, et al. Dietary and physical activity counseling in high-risk asymptomatic patients with metabolic syndrome—A primary care intervention. *Journal of Food, Agriculture & Environment* 2011;**9**(3&4):16-19.
24. Steptoe A, Day S, Doherty S, et al. Behavioural counselling in general practice for the promotion of healthy behaviour among adults at increased risk of coronary heart disease: randomised trialCommentary: Treatment allocation by the method of minimisation. *Bmj* 1999;**319**(7215):943-48.
25. Sartorelli DS, Sciarra EC, Franco LJ, et al. Beneficial effects of short-term nutritional counselling at the primary health-care level among Brazilian adults. *Public health nutrition* 2005;**8**(07):820-25.
26. Ma J, Berra K, Haskell WL, et al. Case management to reduce risk of cardiovascular disease in a county health care system. *Archives of internal medicine* 2009;**169**(21):1988-95.
27. Tibblin G, Åberg H. NON-PHARMACOLOGICAL TREATMENT OF HYPERTENSION IN TWO STEPS-1 YEAR REPORT FROM EIGHT HEALTH CENTRES. *Acta Medica Scandinavica* 1986;**220**(S714):105-12.
28. Gomez-Huelgas R, Jansen-Chaparro S, Baca-Orsio AJ, et al. Effects of a long-term lifestyle intervention program with Mediterranean diet and exercise for the management of patients with metabolic syndrome in a primary care setting. *European Journal of Internal Medicine* 2015;**26**(5):317-23.
29. Wennehorst K, Mildenstein K, Saliger B, et al. A comprehensive lifestyle intervention to prevent type 2 diabetes and cardiovascular diseases: The german chip trial. *Prevention Science* 2016:No Pagination Specified.
30. Salisbury C, O'Cathain A, Thomas C, et al. Telehealth for patients at high risk of cardiovascular disease: Pragmatic randomised controlled trial. *BMJ (Online)* 2016;**353** (no pagination)(i2647).
31. Duncan S, Goodyear-Smith F, McPhee J, et al. Family-centered brief intervention for reducing obesity and cardiovascular disease risk: A randomized controlled trial. *Obesity* 2016;**24**(11):2311-18.
32. Michie S, Richardson M, Johnston M, et al. The behavior change technique taxonomy (v1) of 93 hierarchically clustered techniques: building an international consensus for the reporting of behavior change interventions. *Annals of behavioral medicine* 2013;**46**(1):81-95.
