# Supplementary material for: Multiple health behaviour change interventions for primary prevention of cardiovascular disease in primary care: systematic review and meta-analysis
Source: PubMed Central journal article supplement (PMC5734412; doi:10.1136/bmjopen-2016-015375), 2017-06-15
Supplement: bmjopen-2016-015375supp003.pdf [file bmjopen-2016-015375supp003.pdf]

**Supplementary table 3: Risk of bias assessment.**

| Study<br>(Year)                     | Risk of bias                                                   |                                        |                                                                                     |                                               |                                         |                                     |
|-------------------------------------|----------------------------------------------------------------|----------------------------------------|-------------------------------------------------------------------------------------|-----------------------------------------------|-----------------------------------------|-------------------------------------|
|                                     | Sequence generation<br>(randomisation<br>methods) <sup>a</sup> | Allocation<br>concealment <sup>b</sup> | Blinding of participants<br>and personnel to study<br>group allocation <sup>c</sup> | Blinding of outcome<br>assessors <sup>d</sup> | Incomplete<br>outcome data <sup>e</sup> | Selective<br>reporting <sup>f</sup> |
| Kranjčević, K. et al (2014)         | Unclear                                                        | Unclear                                | Unclear                                                                             | Unclear                                       | High                                    | Low                                 |
| Vetter et al. (2013)                | Low                                                            | Low                                    | High                                                                                | Low                                           | High                                    | Low                                 |
| Lakerveld et al. (2012)             | Low                                                            | Low                                    | High                                                                                | High                                          | High                                    | Low                                 |
| Hardcastle et al. (2013)            | Low                                                            | Low                                    | Low                                                                                 | Low                                           | High                                    | Low                                 |
| Tiessen et al. (2012)               | Low                                                            | Low                                    | High                                                                                | High                                          | Unclear                                 | Low                                 |
| Parra-Medina et al. (2011)          | Unclear                                                        | Unclear                                | Low                                                                                 | Low                                           | High                                    | High                                |
| Drevenhorn et al. (2012)            | Unclear                                                        | Unclear                                | Unclear                                                                             | Unclear                                       | High                                    | Low                                 |
| Brett et al. (2012)                 | Low                                                            | High                                   | High                                                                                | High                                          | Low                                     | High                                |
| Harris et al. (2012)                | Low                                                            | Low                                    | High                                                                                | Low                                           | Low                                     | Low                                 |
| Mendis et al. (2010)                | Unclear                                                        | Unclear                                | High                                                                                | High                                          | Low                                     | Unclear                             |
| Koelewijn-van Loon et al.<br>(2009) | Low                                                            | Low                                    | High                                                                                | High                                          | High                                    | Low                                 |
| Eriksson et al. (2009)              | Low                                                            | Low                                    | High                                                                                | High                                          | Unclear                                 | Low                                 |
| Phelan et al. (2007)                | Unclear                                                        | Unclear                                | Unclear                                                                             | Unclear                                       | Unclear                                 | Unclear                             |
| Harting et al. (2006)               | Unclear                                                        | Unclear                                | Unclear                                                                             | Unclear                                       | Unclear                                 | Unclear                             |
| Korhonen et al. (2003)              | High                                                           | High                                   | High                                                                                | Unclear                                       | High                                    | Low                                 |
| Baron et al. (1990)                 | Unclear                                                        | Unclear                                | Unclear                                                                             | Unclear                                       | Unclear                                 | Unclear                             |
| Knutsen and Knutsen<br>(1991)       | Low                                                            | Low                                    | Unclear                                                                             | Low                                           | Low                                     | Low                                 |
| Nilsson et al. (1992)               | Unclear                                                        | Unclear                                | Unclear                                                                             | Low                                           | Low                                     | Low                                 |
| Wood et al. (1994)                  | Unclear                                                        | Unclear                                | Unclear                                                                             | Unclear                                       | Unclear                                 | Low                                 |
| OXCHECK Study group<br>(1995)       | Unclear                                                        | Unclear                                | High                                                                                | Low                                           | Unclear                                 | Low                                 |
| Lindholm et al. (1995)              | Unclear                                                        | Unclear                                | High                                                                                | Unclear                                       | Low                                     | Low                                 |
| Meland et al. (1997)                | Unclear                                                        | Unclear                                | Unclear                                                                             | Unclear                                       | Unclear                                 | Unclear                             |
| Avram et al. (2011)                 | Unclear                                                        | Unclear                                | Low                                                                                 | Low                                           | Low                                     | Unclear                             |

|                             |         |         |         |         |         |         |
|-----------------------------|---------|---------|---------|---------|---------|---------|
| Stephoe et al. (1999)       | Low     | Low     | High    | High    | High    | Low     |
| Sartorelli et al. (2005)    | Low     | Low     | Low     | High    | High    | Unclear |
| Ma et al. (2009)            | Low     | Low     | Low     | Low     | Unclear | Low     |
| Åberg and Tibblin (1989)    | Low     | Low     | Unclear | Unclear | Low     | Unclear |
| Gomez-Huelgas et al. (2015) | Unclear | Unclear | High    | High    | High    | Unclear |
| Wennehorst et al. (2016)    | Low     | Low     | Unclear | Unclear | High    | Unclear |
| Salisbury et al. (2016)     | Low     | Low     | High    | Low     | Low     | Low     |
| Duncan et al. (2016)        | Low     | Low     | High    | Low     | High    | Low     |

<sup>a</sup> Assessment of whether or not methods used to generate the allocation sequence should produce comparable groups.

<sup>b</sup> Assessment of whether or not the method used to conceal allocation sequence is sufficient or not.

<sup>c</sup> Assessment of the methods used to blind study participants and personnel from knowing intervention allocation.

<sup>d</sup> Assessment of the methods used to blind study outcome assessors from knowing intervention allocation, and whether or not this method of blinding is sufficient.

<sup>e</sup> Assessment of whether incomplete outcome data were adequately dealt with. Studies missing outcome data for >20% of participants who underwent randomization were considered at high risk of bias, while studies missing <10% of participants who underwent randomization were considered at low risk of bias.

<sup>f</sup> Assessment of whether all outcome measures described in the introduction and methods section of the paper (and published protocols) were reported.
