# Supplementary material for: Multiple health behaviour change interventions for primary prevention of cardiovascular disease in primary care: systematic review and meta-analysis
Source: PubMed Central journal article supplement (PMC5734412; doi:10.1136/bmjopen-2016-015375), 2017-06-15
Supplement: bmjopen-2016-015375supp004.pdf [file bmjopen-2016-015375supp004.pdf]

- Item 1) Theory/ model of behaviour mentioned
- Item 2) Targeted construct mentioned
- Item 3) Intervention based on single theory
- Item 4) Theory used to select recipients
- Item 5) Theory used to select intervention techniques
- Item 6) Theory used to tailor intervention techniques to recipients
- Item 7) All intervention techniques are explicitly linked to theory construct
- Item 8) At least one of the intervention techniques are explicitly linked to theory construct
- Item 9) Group of techniques are linked to a group of constructs
- Item 10) All theory relevant constructs are explicitly linked to at least one intervention technique.
- Item 11) At least one of the theory relevant constructs are explicitly linked to at least one intervention technique.
- Item 12) theory-relevant constructs are measured
- Item 13) Quality of measures
- Item 14) Randomization of participants' condition
- Item 15) Changes in measured theory-relevant constructs
- Item 16) Mediation analysis of constructs
- Item 17) Results discussed in relation to theory
- Item 18) Appropriate support for theory
- Item 19) Results used to refine theory
